# Supplementary material for: Implementation of an individual patient prospective database of hospital births in Sri Lanka and its use for improving quality of care
Source: PubMed Central journal article supplement — BMJ Open. 2019 Feb 3;9(2):e023706. doi: 10.1136/bmjopen-2018-023706 (PMC6368149; doi:10.1136/bmjopen-2018-023706), 2019-02-03
Supplement: bmjopen-2018-023706.draft_revisions.pdf [file bmjopen-2018-023706.draft_revisions.pdf]

# BMJ Open

BMJ Open is committed to open peer review. As part of this commitment we make the peer review history of every article we publish publicly available.

When an article is published we post the peer reviewers' comments and the authors' responses online. We also post the versions of the paper that were used during peer review. These are the versions that the peer review comments apply to.

The versions of the paper that follow are the versions that were submitted during the peer review process. They are not the versions of record or the final published versions. They should not be cited or distributed as the published version of this manuscript.

BMJ Open is an open access journal and the full, final, typeset and author-corrected version of record of the manuscript is available on our site with no access controls, subscription charges or pay-per-view fees (<http://bmjopen.bmj.com>).

If you have any questions on BMJ Open's open peer review process please email [info.bmjopen@bmj.com](mailto:info.bmjopen@bmj.com)

# BMJ Open

## Implementation of an individual-patient prospective database of hospital births in Sri Lanka and its use for improving quality of care

|                               |                                                                                                                                                                                                                                                                                                                                                                                                                                                                                                                                                                                                                                                                                                                                                                                                                                                                                                                                                                                                                                                                                                                                                                                                                                                                                                                                                                                                                                                                                                                                                                                                                                                                                                                                                                                                                                                                                                                                                                              |
|-------------------------------|------------------------------------------------------------------------------------------------------------------------------------------------------------------------------------------------------------------------------------------------------------------------------------------------------------------------------------------------------------------------------------------------------------------------------------------------------------------------------------------------------------------------------------------------------------------------------------------------------------------------------------------------------------------------------------------------------------------------------------------------------------------------------------------------------------------------------------------------------------------------------------------------------------------------------------------------------------------------------------------------------------------------------------------------------------------------------------------------------------------------------------------------------------------------------------------------------------------------------------------------------------------------------------------------------------------------------------------------------------------------------------------------------------------------------------------------------------------------------------------------------------------------------------------------------------------------------------------------------------------------------------------------------------------------------------------------------------------------------------------------------------------------------------------------------------------------------------------------------------------------------------------------------------------------------------------------------------------------------|
| Journal:                      | <i>BMJ Open</i>                                                                                                                                                                                                                                                                                                                                                                                                                                                                                                                                                                                                                                                                                                                                                                                                                                                                                                                                                                                                                                                                                                                                                                                                                                                                                                                                                                                                                                                                                                                                                                                                                                                                                                                                                                                                                                                                                                                                                              |
| Manuscript ID                 | bmjopen-2018-023706                                                                                                                                                                                                                                                                                                                                                                                                                                                                                                                                                                                                                                                                                                                                                                                                                                                                                                                                                                                                                                                                                                                                                                                                                                                                                                                                                                                                                                                                                                                                                                                                                                                                                                                                                                                                                                                                                                                                                          |
| Article Type:                 | Research                                                                                                                                                                                                                                                                                                                                                                                                                                                                                                                                                                                                                                                                                                                                                                                                                                                                                                                                                                                                                                                                                                                                                                                                                                                                                                                                                                                                                                                                                                                                                                                                                                                                                                                                                                                                                                                                                                                                                                     |
| Date Submitted by the Author: | 19-Apr-2018                                                                                                                                                                                                                                                                                                                                                                                                                                                                                                                                                                                                                                                                                                                                                                                                                                                                                                                                                                                                                                                                                                                                                                                                                                                                                                                                                                                                                                                                                                                                                                                                                                                                                                                                                                                                                                                                                                                                                                  |
| Complete List of Authors:     | <p>Lazzerini, Marzia; WHO Collaborating Centre Trieste, Institute for Maternal and Child Health IRCCS Burlo Garofolo</p> <p>Senanayake, H.; Faculty of Medicine, Department of Obstetrics &amp; Gynaecology, University of Colombo; University Obstetrics Unit, De Soysa Hospital for Women, Colombo, Sri Lanka</p> <p>Mohamed , Rishard ; Faculty of Medicine, Department of Obstetrics &amp; Gynaecology, University of Colombo; University Obstetrics Unit, De Soysa Hospital for Women, Colombo, Sri Lanka</p> <p>Kaluarachchi, Athula; Faculty of Medicine, Department of Obstetrics &amp; Gynaecology, University of Colombo; University Obstetrics Unit, De Soysa Hospital for Women, Colombo, Sri Lanka</p> <p>Fernando , Roshini; Faculty of Medicine, Department of Obstetrics &amp; Gynaecology, University of Colombo</p> <p>Sakalasuriya , Anshumalie; Faculty of Medicine, Department of Obstetrics &amp; Gynaecology, University of Colombo</p> <p>Ihsan , Fathima Reshma; Faculty of Medicine, Department of Obstetrics &amp; Gynaecology, University of Colombo</p> <p>Saravanabhava , Namasivayam; District Hospital Thellipalai, Thellipalai, Sri Lanka</p> <p>Gamaathige , Nalin; De Soysa Hospital for Women, Colombo, Sri Lanka, Neonatology Unit</p> <p>Jayawardena , Madura ; Department of Obstetrics &amp; Gynaecology, Faculty of Medical Sciences, University of Sri Jayawardenapura</p> <p>Gamage, Ruwan Vidana; Base Hospital, Balangoda</p> <p>Covi, Benedetta; WHO Collaborating Centre Trieste, Institute for Maternal and Child Health IRCCS Burlo Garofolo</p> <p>Wanzira, Humphey; WHO Collaborating Centre Trieste, Institute for Maternal and Child Health IRCCS Burlo Garofolo</p> <p>Businelli, Caterina; WHO Collaborating Centre Trieste, Institute for Maternal and Child Health IRCCS Burlo Garofolo</p> <p>Piccoli, Monica ; WHO Collaborating Centre Trieste, Institute for Maternal and Child Health IRCCS Burlo Garofolo</p> |
| Keywords:                     | Maternal medicine < OBSTETRICS, Quality in health care < HEALTH SERVICES ADMINISTRATION & MANAGEMENT, HEALTH SERVICES ADMINISTRATION & MANAGEMENT                                                                                                                                                                                                                                                                                                                                                                                                                                                                                                                                                                                                                                                                                                                                                                                                                                                                                                                                                                                                                                                                                                                                                                                                                                                                                                                                                                                                                                                                                                                                                                                                                                                                                                                                                                                                                            |
|                               |                                                                                                                                                                                                                                                                                                                                                                                                                                                                                                                                                                                                                                                                                                                                                                                                                                                                                                                                                                                                                                                                                                                                                                                                                                                                                                                                                                                                                                                                                                                                                                                                                                                                                                                                                                                                                                                                                                                                                                              |

1  
2  
3  
4  
5  
6  
7  
8  
9  
10  
11  
12  
13  
14  
15  
16  
17  
18  
19  
20  
21  
22  
23  
24  
25  
26  
27  
28  
29  
30  
31  
32  
33  
34  
35  
36  
37  
38  
39  
40  
41  
42  
43  
44  
45  
46  
47  
48  
49  
50  
51  
52  
53  
54  
55  
56  
57  
58  
59  
60

SCHOLARONE™  
Manuscripts

For peer review only

# Implementation of an individual-patient prospective database of hospital births in Sri Lanka and its use for improving quality of care

**Short title: Individual patient maternal and newborn database to improve quality of care in Sri Lanka**

Marzia Lazzerini,<sup>1</sup> Hematha Senanayake,<sup>2,3</sup> Rishard Mohamed,<sup>2,3</sup> Athula Kaluarachchi,<sup>2,3</sup>,  
Roshini Fernando,<sup>3</sup> Anshumalie Sakalasuriya,<sup>3</sup> Fathima Reshma Ihsan,<sup>3</sup> Namasivayam  
Saravanabhava,<sup>4</sup> Nalin Gamaathige,<sup>5</sup> Madura Jayawardena,<sup>6</sup> Ruwan Vidana Gamage,<sup>7</sup>  
Benedetta Covi,<sup>1</sup> Humphrey Wanzira,<sup>1</sup> Caterina Businelli,<sup>1</sup> Monica Piccoli.<sup>1</sup>

<sup>1</sup> WHO Collaborating Centre for Maternal and Child Health, Institute for Maternal and Child Health IRCCS Burlo Garofolo, Trieste, Italy.

<sup>2</sup> University Obstetrics Unit, De Soysa Hospital for Women, Colombo, Sri Lanka

<sup>3</sup> Faculty of Medicine, Department of Obstetrics & Gynaecology, University of Colombo, Colombo, Sri Lanka.

<sup>4</sup> District Hospital Thellipalai, Thellipalai, Sri Lanka.

<sup>5</sup> Neonatology Unit, De Soysa Hospital for Women, Colombo, Sri Lanka

<sup>6</sup> Department of Obstetrics & Gynaecology, Faculty of Medical Sciences, University of Sri Jayawardenapura, Nugegoda 10250, Sri Lanka

<sup>7</sup> Base Hospital, Balangoda, Sri Lanka

## Authors' e-mail contacts

ML: marzia.lazzerini@burlo.trieste.it

HS: senanayakeh@gmail.com

RM: mrishard@obg.cmb.ac.lk

AK: akaluarachchi@obg.cmb.ac.lk

RF: ragynobs2009@gmail.com

AS: sakalasaruriyasaritha43@gmail.com

FRI: resh.ihsan798@gmail.com

NS: sarabhava@yahoo.com

NG: nalinnicu@gmail.com

MJ: madurammj@yahoo.com

RVG: ruwangamage21@yahoo.com

BC: benedetta.covi@burlo.trieste.it

HW: humphey.wanzira@burlo.trieste.it

CB: caterina.businelli@burlo.trieste.it

MP: monica.piccoli@burlo.trieste.it

1  
2  
3  
4  
5  
6  
7  
8  
9  
10  
11  
12  
13  
14  
15  
16  
17  
18  
19  
20  
21  
22  
23  
24  
25  
26  
27  
28  
29  
30  
31  
32  
33  
34  
35  
36  
37  
38  
39  
40  
41  
42  
43  
44  
45  
46  
47  
48  
49  
50  
51  
52  
53  
54  
55  
56  
57  
58  
59  
60

**Corresponding author**

Marzia Lazzerini DTMH, MSc, PhD  
WHO Collaborating Centre for Maternal and Child Health  
Institute for Maternal and Child Health IRCCS Burlo Garofolo  
Via dell'Istria 65/1, 34137, Trieste, ITALY

For peer review only

## ABSTRACT

**Objectives** This study aimed at piloting a prospective individual patient database on hospital deliveries in Colombo, Sri Lanka, and at exploring feasibility, quality of data collected, and uses of data for improving quality of care (QoC).

**Design** Observational study

**Setting** De Soysa Teaching Hospital for Women, the largest referral hospital for maternity care in Sri Lanka.

**Data collection and analysis** From July 2015 to June 2017 for each delivery 150 variables were collected in a standardised form and entered in a database. Data were analysed every eight months and results were made available to local staff. Outcomes of the study included: technical problems; data completeness; data accuracy; key database findings; use of data .

**Results** 7504 deliveries were recorded. None technical problem was reported. Data completeness exceed that of other existing hospital recording systems. Missing data were less than 1% for maternal variables, and less than 3% for newborn variables. Mistakes in data collection and entry occurred in 0.01% and 0.09% of cases respectively. Key QoC indicators identified in comparison to international standards were: relatively low maternal mortality (0.053%); relatively high maternal near-miss cases (3.4%); high rate of induction of labour (24.6%), caesarean section (30.0%) and episiotomy (56.1%); relatively high rate of preterm babies (9.4%), low-birth-weight babies (16.5%), stillbirth (0.97%), and of total deaths in newborn (1.98%). Recommendations developed focused on the key indicators identified and included the use of checklist to standardise case management, training, clinical audits, and more information for patients. Based on this pilot experience, a list of lessons learned was drawn.

**Conclusions** The study shows that the implemented system of data collection is feasible and can accumulate reliable data. Most importantly, this experience provides an example on how database findings can be used for discussing hospital practices, identifying gaps, and agree recommendations for improving the QoC.

## Article summary: strengths and limitations of this study

- The study reports on the first individual patient database for comprehensive prospective data collection on births in Sri Lanka. Very few individual patient databases exist in general in low and middle-income countries (LMIC).
- The study showed that implementing the database is feasible and can produce a large number of reliable information that can be used for quality improvement purposes, thus providing a model that can be adopted by policy makers in other similar settings.
- Although the study was single-centre, it has the merit of reporting both technical feasibility related to the database implementation, quality of data (ie, data completeness and accuracy), lessons learned, and, actual use of data – the latter three being often neglected issues -.

### Keywords

Quality of care; Health Information system; mothers and newborns.

### Disclosure of interests

None competing interest

### List of abbreviations

LMIC = low and middle-income countries

MM= maternal mortality ratio

QoC= Quality of Care

WHO = World Health Organization

## BACKGROUND

The availability of an actionable health information system is one of the key components of the World Health Organisation (WHO) framework for improving the quality of maternal and newborn health care (1,2) and one of the recommended cross-cutting actions in the WHO Strategy for Ending Preventable Maternal Mortality (EPMM) (3). According to WHO standards (2), “the health information systems should enable using data to ensure timely actions to improve the care of every woman and newborn”. More specifically, a health facility should have mechanisms for data collection, analysis and feedback as part of the activities for monitoring and improving performance around the time of childbirth (2).

However, estimates have highlighted major gaps in data collection even on key indicators: only one third of countries have the capacity to count or register maternal deaths (3,4) and less than two fifths of all countries have a complete civil registration system with accurate attribution of the cause of death (3,5). Quality of data is also a reason of significant concern: according to a WHO review, although most countries are using some core indicators to monitor performance in maternal and newborn care, virtually no low- or lower-middle-income country has a full system of data sharing and transparent quality control in place (6). The availability of accurate data is relatively limited even in high-income countries, where most often hospital administrative datasets lack key information - such as maternal risk factors- needed for evaluating the case mix and for interpreting the observed outcomes (7).

Sri Lanka is a lower middle-income country (8). Since the civil war ended in 2009, the economy has grown on average at 6.2% per year (8), in transition from being predominantly rural-based to one that is urban-oriented around manufacturing and services. Major progresses have been made in maternal healthcare in past decades: according to the last estimates the reported maternal mortality ratio (MMR) is relatively low (33.7/100.000) (9). However, no significant improvement in the MMR have been observed in the last 10 years (8-11). The latest national Maternal Mortality Review have shown that 50% of maternal deaths are from direct causes, with preventable causes, such as post-partum haemorrhage and sepsis, being among the top five causes of death (9). Almost 80% all women died in hospitals (9), where specialized facilities are available, thus suggesting possible gaps in quality of the care provided (9). Inappropriate practices are suggested also by other indicators, such as the rising rate of caesarean section (CS) (12), peaking above 50% in selected facilities (12). The estimated rate of induction of labour in Sri Lanka is currently among the highest in Asia (35.5%) and the rate of inductions without medical indication is reported to be 27.8% (13).



1  
2  
3 Presently in Sri Lanka the health information system collects data only on selected maternal and  
4 newborn indicators, in an aggregate form. The objective of this study was to pilot, in the largest  
5 maternity unit in Sri Lanka, a system for collecting prospectively, for each case of delivery, a wide  
6 number of variables reflecting maternal and newborn characteristics, hospital practices and  
7 outcomes. The study aimed at exploring the feasibility of such system, the quality of data collected,  
8 and the concrete uses of data to improve quality of health care.  
9  
10  
11

## 12 13 **METHODS**

### 14 15 16 **Population and setting**

17 The study was conducted at De Soysa Teaching Hospital for Women in Colombo, the largest  
18 referral hospital for maternity care in Sri Lanka. In June 2015, a database for routinely collecting  
19 individual patient data was implemented in wards 3 and 15, the two wards of the University  
20 Obstetrics Unit in the hospital, where about half of the total deliveries of the hospital take place.  
21 All deliveries occurring in these two wards, with no exclusions, were to be entered in the database.  
22 This paper reports finding of the first 24 months of data collection, from July 2015 to June 2017.  
23  
24  
25  
26  
27

### 28 29 **Data collection tools**

30 For each case of delivery, data were collected in a standardised form (“Yellow Form”) and entered  
31 in a database. The “Yellow Form” was two pages long (**Appendix 1**), and recorded 150 variables  
32 for each case of delivery: demographic and socio-economic data of the woman (8 variables);  
33 characteristics of pregnancy and risk factors (28 variables); process of care during birth (60  
34 variables); maternal health outcomes (31 variables); newborn health at birth and during  
35 hospitalisation, process of care and health outcomes (23 variables). The database was developed  
36 using Epidata (14), a free software that allows for inclusion of internal checks. Data were collected  
37 and entered in the database by dedicated trained data collectors.  
38  
39  
40  
41  
42

### 43 44 **Data quality assurance procedures**

45 The Yellow Form was developed through a participatory approach with local staff. The team  
46 involved included: six senior obstetricians from De Soysa Hospital and other hospitals in Sri Lanka,  
47 eight midwifery-qualified nurses, two registrars in obstetrics and gynaecology, one neonatologist,  
48 one registrar in neonatology, two data collectors. Two external researchers (one obstetrician and  
49 one epidemiologist) participated as facilitators. Instructions on how to fill the form, and specific  
50 case definitions were developed in parallel with the development of form and embedded in it  
51 (**Appendix 1**).  
52  
53  
54  
55  
56  
57  
58  
59  
60

1  
2  
3 Both the form of data collection and the instructions on how to fill it and how to transfer information  
4 in the database were field tested. Procedures of data collection were field tested to evaluate the  
5 following domains: if the sequence of data in the form was appropriate; if case definitions were  
6 clear; if data collectors were able to fill the form and enter data in the database; if time needed to  
7 fill the form and enter data in the database was acceptable to allow routine data collection; if there  
8 were sources of systematic error or bias; if there was any technical problem. Data collectors were  
9 young medical doctors who were trained on the standard operating procedures (SOP) of data  
10 collection and data entry and supervised over time.  
11  
12  
13  
14  
15

16 The database was designed in a way that the interface for data entry was almost identical to the  
17 "Yellow Form". To further minimise data-entry errors, the database contained 137 internal  
18 automatic validation rules, aiming at minimising errors in biological plausibility of data (i.e. normal  
19 ranges), data completeness and internal consistency.  
20  
21  
22  
23

24 For the initial period of data collection for each case of delivery two data collectors independently  
25 filled a Yellow Form and data were cross-checked to evaluate consistency. This procedure was  
26 kept until when errors in data collection were consistently low (ie. below 0.02%; this was achieved  
27 in the time period of about 1 month). Subsequently, data completeness and accuracy in data  
28 collection and data entry was monitored by an external independent data monitor who randomly  
29 reviewed 5% of forms and 5% entered cases. Missing cases or errors in data collection/entry were  
30 to be corrected in real time. Data were also externally monitored for completeness and internal  
31 consistency at about four months intervals.  
32  
33  
34  
35  
36

### 37 **Data analysis and use**

38 Data were analysed at intervals of eight months by a standardized plan for analysis, agree among  
39 partners. This included: a descriptive analysis of all the key variables in the database; an analysis  
40 of CS appropriateness according to Robson Classification (15,16) and other minor secondary  
41 analyses as suggested by the finding of the primary analysis and as requested by partners. Data  
42 were analysed by the external team (WHO Collaborating Centre) and made available as tables and  
43 graphs to the local staff (De Soysa hospital) in the format of a power point presentation.  
44  
45  
46  
47  
48

### 49 **Outcomes**

50 This study aimed at evaluating feasibility of implementing the database, the quality of data  
51 collected, and the use of data. Outcomes of the study are reported in Box 1 and further described  
52 below.  
53  
54  
55  
56  
57  
58  
59  
60

1  
2  
3 Technical problems in data collection were defined as any technical problem occurring with the use  
4 of the database (either with the software or with the computer). These had to be notified by data  
5 collectors in real time to the local coordinator and to the external team.  
6

7 Database completeness was checked by an independent assessor by comparing the number of  
8 cases entered in the database with data in the official hospital registers, and specifically with the  
9 following eight data sources: i) birth register; ii) intensive care unit (ICU) admissions register; iii)  
10 operating theatre (OT) register; iv) neonatal intensive care unit (NICU) admissions register; v)  
11 Special Care Baby Unit (SCBU) admissions register; vi) maternal deaths reviews; vii) perinatal  
12 mortality and morbidity statistics; viii) monthly reports.  
13

14 The number of missing cases for each variable was calculated as the number of missing cases in  
15 the database out of the total expected entries for that variable.  
16

17 Accuracy in data collection was measured by the number of variables correctly recorded in the  
18 yellow form when compared to the original medical files. Accuracy in data enter was measured by  
19 the number of variables correctly recorded in the database compared to the yellow forms. Both  
20 accuracy in data collection and data entry were assessed by an external independent data  
21 collector who randomly checked 5% of forms and 5% of entered cases, respectively.  
22

23 Database findings included a descriptive analysis of the key variables as agreed among partners.  
24 Data on multiple pregnancies were not included in this primary descriptive analysis of newborn  
25 outcomes.  
26

27 Use of data for quality improvement purposes included any action-oriented type of use, such as  
28 use for internal discussion.  
29  
30  
31  
32  
33  
34  
35

### 36 **Box 1. Outcomes of the study**

37 **i) Technical problems:**

- 38 - any type of technical problem in implementing and using the database.  
39  
40

41 **ii) Data completeness:**

- 42 - number of cases entered in the database versus data in the official registers;  
43 - number of missing cases for each variable in the database.  
44  
45  
46  
47

48 **iii) Data accuracy:**

- 49 - number of correct variables in the yellow form versus the original medical files;  
50 - number of correct variables in the database compared to the yellow forms.  
51  
52  
53

54 **iv) Database findings:**

- 55 - descriptive analysis of the key variables as agreed among partners.  
56  
57  
58  
59  
60

v) **Use of data for quality improvement purposes:**

- any action-oriented type of use.

### Ethical considerations

The study was approved by the Ethics Review Committee of the Faculty of Medicine, University of Colombo. Confidentiality was maintained by de-identifying all files before database entry. Human subjects were not directly involved in the study. Informed consent was not requested by the Ethics Review Committee.

## RESULTS

### Technical problems

No technical problems occurred. The data collectors reported that there were no technical difficulties in managing the database.

### Data completeness

**Table 1** reports the number of total cases in the database when compared to other official hospital data sources. Numbers were matching, except for the cases of hysterectomies, for which the database appear to contain one additional case (verified as actually being a real case).

**Table 1. Number of cases in the database compared to hospital registers and other official sources of data**

|                                        | Database | Hospital registers | Source of data for comparison                                      |
|----------------------------------------|----------|--------------------|--------------------------------------------------------------------|
| <b>Maternal indicators</b>             |          |                    |                                                                    |
| Total deliveries                       | 7504     | 7504               | Birth register                                                     |
| Maternal deaths                        | 4        | 4                  | maternal deaths reviews                                            |
| Admission to ICU                       | 239      | 239                | ICU register                                                       |
| PPH                                    | 147      | 147                | Birth register                                                     |
| OT after delivery                      | 11       | 11                 | OT register                                                        |
| Hysterectomy                           | 22       | 21                 | OT register                                                        |
| <b>Newborn indicators <sup>1</sup></b> |          |                    |                                                                    |
| Stillbirth                             | 82       | 82                 | Birth register, monthly reports                                    |
| Admission to NICU                      | 105      | 105                | NICU register                                                      |
| Admission to SCBU                      | 1121     | 1121               | SCBU register                                                      |
| Neonatal deaths after birth            | 81       | 81                 | Birth register + NICU and SCBU registers + perinatal mortality and |

|  |  |  |                      |
|--|--|--|----------------------|
|  |  |  | morbidity statistics |
|--|--|--|----------------------|

Notes: <sup>1</sup> Including also the second twin in multiple pregnancies.

Abbreviation: ICU= Intensive care unit; NICU= Neonatal intensive care unit; OT= operating theatre; PPH= post-partum haemorrhage; SCBU= semi-intensive baby unit

Number of missing variables is reported in **Appendix 2**. Missing data were less than 1% for all maternal variables, and less than 2% in all but two newborn variables.

### Data accuracy

Random checks by an independent data monitor on 5% of Yellow Forms and 5% of entered cases revealed that mistakes in data collection in the forms occurred in 0.01% of cases, while mistakes in data entry in the database occurred in 0.09% of cases.

### Database findings

**Tables 2,3 and 4** report the descriptive analysis of key indicators in the database. Overall, during the two years of the study period, 7504 deliveries were entered (Table 2). In terms of socio-demographic characteristics, most of women belonged to the following categories: 4253 (56.7%) were 25 to 34 years old; 6028 (80.3%) had secondary education; 6253 (83.3%) were housewives; 5231 (69.7%) had a normal nutritional status. Overall, in 4182 (55.7%) of deliveries there was at least one risk factor, the most prevalent being gestational diabetes (13.4%), pre-term or post-term delivery (12.9%), and previous CS (12.7%). Overall 2870 (38.2%) were primigravidae.

**Table 2. Maternal characteristics**

|                              | n<br>(N=7504) | %     |
|------------------------------|---------------|-------|
| <b>Age categories</b>        |               |       |
| < 18 years                   | 236           | 3.14  |
| 19-24 years                  | 1721          | 22.93 |
| 25-34 years                  | 4253          | 56.68 |
| 35-39 years                  | 1036          | 13.81 |
| >40 years                    | 224           | 2.99  |
| Missing                      | 34            | 0.44  |
| <b>Number of pregnancies</b> |               |       |
| 1                            | 2870          | 38.24 |
| 2                            | 2313          | 30.82 |
| ≥3                           | 2285          | 30.47 |
| Missing                      | 34            | 0.45  |
| <b>Education</b>             |               |       |

|                                                   |      |       |
|---------------------------------------------------|------|-------|
| None                                              | 23   | 0.31  |
| Primary                                           | 235  | 3.13  |
| Secondary                                         | 6028 | 80.33 |
| Higher                                            | 1181 | 15.74 |
| Missing                                           | 37   | 0.49  |
| <b>Work</b>                                       |      |       |
| Not reported by the mother                        | 77   | 1.03  |
| Working                                           | 1136 | 15.14 |
| Housewife                                         | 6253 | 83.33 |
| Missing                                           | 38   | 0.51  |
| <b>Marital status</b>                             |      |       |
| Married                                           | 7350 | 97.95 |
| Unmarried                                         | 96   | 1.28  |
| Living together                                   | 20   | 0.27  |
| Missing                                           | 38   | 0.51  |
| <b>Nutritional status</b> <sup>1</sup>            |      |       |
| Underweight                                       | 670  | 8.93  |
| Normal                                            | 5231 | 69.71 |
| Overweight                                        | 1110 | 14.79 |
| Obese                                             | 440  | 5.86  |
| Missing                                           | 53   | 0.71  |
| <b>Women with risk factors (any)</b> <sup>2</sup> |      |       |
| <b>Risk factors</b>                               |      |       |
| <b>Gestational diabetes, total</b>                |      |       |
| On diet                                           | 417  | 5.56  |
| On drug therapy                                   | 585  | 7.80  |
| Gestational age <37 >= 41                         | 966  | 12.87 |
| Previous CS                                       | 956  | 12.74 |
| <b>Hypertensive disorders of pregnancy, any</b>   |      |       |
| Pre-gestational hypertension                      | 168  | 2.24  |
| Gestational hypertension                          | 179  | 2.39  |
| Pre-eclampsia not severe                          | 78   | 1.04  |
| Pre-eclampsia severe                              | 69   | 0.92  |
| Eclampsia                                         | 12   | 0.16  |
| IUGR at ultrasound                                | 504  | 6.72  |
| Obesity                                           | 440  | 5.86  |
| Breech/transverse lie                             | 339  | 4.52  |
| Pre-gestational diabetes                          | 266  | 3.54  |
| Maternal cardiac disease                          | 234  | 3.12  |
| Fetal conditions, other                           | 223  | 3.10  |

|                         |     |      |
|-------------------------|-----|------|
| Maternal hypothyroidism | 219 | 2.92 |
| Maternal age >40        | 224 | 2.9  |
| Oligohydramnios         | 131 | 1.75 |
| APH                     | 112 | 1.49 |
| Polyhydramnios          | 96  | 1.28 |
| Multiple pregnancies    | 84  | 1.12 |
| Severe anaemia          | 40  | 0.53 |
| Chorioamnionitis        | 11  | 0.15 |

Notes: <sup>1</sup> As defined by National Guidelines in Sri Lanka. <sup>2</sup> Any of the risk factor.

Abbreviations: APH= ante-partum haemorrhage; CS= caesarian section; IUGR= intra-uterine growth retardation.

In terms of process indicators and maternal outcomes (**Table 3**), 1849 (24.6%) of women had their labour induced, and 2251 (30.0%) had a CS. When analysed according to the Robson recommendations (15), the CS rate by Robson group appeared to be particularly high in group 1 (nulliparous, single cephalic, at term, in spontaneous labour), 3 (multiparous, single cephalic, at term in spontaneous labour), and 5 (previous CS, single cephalic at term), being respectively 16.4%, 5.2% and 81.1% compared to recommended rates (15) of 10%, less than 3% and less than 60%. Rate of vaginal birth after CS (VBAC) was 17.1%. Episiotomy was performed in 4213 (56.1%) of women. In terms of health outcomes, there were four cases of maternal death (0.053%). Overall 254 (3.38%) of cases were identified as maternal near-miss. Post-partum haemorrhage (any severity) occurred in 147 (1.9%) women, with 39 (0.52%) women having a severe or massive haemorrhage. Overall there were 22 (0.29%) cases of hysterectomy. During the whole study period there were no cases of uterine rupture.

**Table 3. Birth process indicators and maternal outcomes**

|                                 | n<br>(N=7504) | %     |
|---------------------------------|---------------|-------|
| <b><i>Labour onset</i></b>      |               |       |
| Spontaneous                     | 4726          | 62.98 |
| Induction                       | 1849          | 24.64 |
| Pre-labour CS                   | 893           | 11.90 |
| Missing                         | 36            | 0.48  |
| <b><i>Mode of delivery</i></b>  |               |       |
| Vaginal spontaneous             | 4906          | 65.38 |
| Vaginal operative               | 310           | 4.13  |
| Caesarean section               | 2251          | 30.00 |
| Missing                         | 37            | 0.49  |
| <b><i>Caesarean section</i></b> |               |       |
| In spontaneous labour onset     | 927           | 19.61 |

|                                                                    |      |       |
|--------------------------------------------------------------------|------|-------|
| In induction of labour                                             | 441  | 28.85 |
| <b><i>Caesarean section rate by Robson groups <sup>1</sup></i></b> |      |       |
| Group 1                                                            | 246  | 16.42 |
| Group 2a                                                           | 257  | 31.18 |
| Group 2b                                                           | 120  | 100   |
| Group 3                                                            | 105  | 5.17  |
| Group 4 a                                                          | 81   | 11.21 |
| Group 4b                                                           | 49   | 100   |
| Group 5                                                            | 666  | 81.11 |
| Group 6                                                            | 96   | 81.35 |
| Group 7                                                            | 90   | 78.26 |
| Group 8                                                            | 63   | 75.0  |
| Group 9                                                            | 42   | 100   |
| Group 10                                                           | 258  | 43.87 |
| <b><i>Episiotomy</i></b>                                           | 4213 | 56.14 |
| <b><i>Key maternal outcomes</i></b>                                |      |       |
| Maternal deaths                                                    | 4    | 0.05  |
| Admission to ICU                                                   | 239  | 3.18  |
| Near-miss cases <sup>2</sup>                                       | 254  | 3.38  |
| PPH                                                                | 147  | 1.96  |
| OT after delivery                                                  | 11   | 0.15  |
| Hysterectomy                                                       | 22   | 0.29  |
| Uterine Rupture                                                    | 0    | 0     |
| Sepsis                                                             | 29   | 0.39  |
| DVT/PE                                                             | 2    | 0.03  |
| Abruptio placentae                                                 | 21   | 0.38  |
| Amniotic fluid embolisms                                           | 0    | 0     |
| Perineal tears III-IV degree                                       | 17   | 0.23  |

Notes: <sup>1</sup> As for Robson's classification (15); <sup>2</sup> As for WHO classification (37)

Abbreviations: CS= caesarian section; DVT= Deep vein thrombosis; ICU= Intensive care unit; NICU= Neonatal intensive care unit; OT= operating theatre; PE= pulmonary embolism; PPH= post-partum haemorrhage.

The analysis of the newborns' characteristics and outcomes (**Table 4**) pointed out the following key indicators: 708 (9.4%) of infants were born before the 37 week of gestational age; 1243 (16.6%) had a birth weight below 2500 grams, and of these 748 (60.2%) were babies born at term; 73 (0.97%) were stillborn; 173 (2.3%) were ventilated for more than 10 seconds in the delivery room. Overall 917 (12.2%) newborns had at least one complication, of which the most frequent was the respiratory distress syndrome (3.7%). Overall, 101 (1.62) newborns had major malformations.



Overall 148 (1.98%) infants were either born dead or died during the hospitalisation; among the cases of deaths (either stillbirths or after birth), 55.1% had major malformations.

**Table 4. Newborns' characteristics and outcomes**

| <b>NEWBORN</b>                                       | n<br>(N=7504) <sup>1</sup> | %     |
|------------------------------------------------------|----------------------------|-------|
| <b>Sex</b>                                           |                            |       |
| Female                                               | 3644                       | 48.56 |
| Male                                                 | 3792                       | 50.83 |
| Missing                                              | 68                         | 0.91  |
| <b><i>Gestational age (weeks + days)</i></b>         |                            |       |
| < 33 + 6                                             | 223                        | 2.96  |
| 34 to 36+ 6                                          | 485                        | 6.19  |
| 37 to 40+ 6                                          | 6491                       | 86.50 |
| > 41                                                 | 258                        | 3.43  |
| Missing                                              | 47                         | 0.62  |
| <b><i>Weight at birth</i></b>                        |                            |       |
| <1499                                                | 149                        | 1.99  |
| 1500 to 1999                                         | 183                        | 2.44  |
| 2000 to 2499                                         | 911                        | 12.14 |
| 2500 to 3499                                         | 5365                       | 71.50 |
| 3500 to 4000                                         | 724                        | 9.65  |
| >4000                                                | 104                        | 1.39  |
| Missing                                              | 68                         | 0.91  |
| <b>Stillbirth, total</b>                             | 73                         | 0.97  |
| Macerated                                            | 42                         | 0.56  |
| Fresh                                                | 27                         | 0.36  |
| Missing                                              | 4                          |       |
| Ventilated in delivery room for more than 10 seconds | 173                        | 2.34  |
| Asphyxia                                             | 62                         | 0.84  |
| <b>Post-delivery</b>                                 |                            |       |
| With mother                                          | 6164                       | 82.14 |
| SCBU                                                 | 1105                       | 14.73 |
| NICU                                                 | 96                         | 1.28  |
| Referred                                             | 9                          | 0.12  |
| Death                                                | 75                         | 1     |
| Missing                                              | 11                         | 0.07  |
| <b><i>Neonates with any complication</i></b>         | 917                        | 12.22 |
| <b><i>Complications</i></b>                          |                            |       |
| RDS                                                  | 276                        | 3.73  |

|                               |      |       |
|-------------------------------|------|-------|
| Infection, other than sepsis  | 121  | 1.35  |
| Major malformation            | 101  | 1.62  |
| Neurological <sup>2</sup>     | 38   | 0.50  |
| Sepsis                        | 28   | 0.38  |
| Major Birth Trauma            | 16   | 0.21  |
| Severe jaundice with ET       | 15   | 0.20  |
| Others <sup>3</sup>           | 232  | 3.09  |
| Final outcome                 |      |       |
| Discharged                    | 7204 | 96.00 |
| Discharged with disabilities  | 4    | 0.05  |
| Death (including stillbirths) | 148  | 1.98  |
| Referred                      | 54   | 0.72  |
| LAMA                          | 15   | 0.20  |

Notes: <sup>1</sup> Data on multiple pregnancies were not included in this primary analysis. <sup>2</sup> Seizures, ventricular haemorrhage and other neurological complications. <sup>3</sup> Most frequent reported conditions in this class were other respiratory problems (eg, apnoea, meconium aspiration syndrome, pulmonary hypertension), gastrointestinal problems (eg, bleeding), minor jaundice.

Abbreviations: ET= exchange transfusion; LAMA= Left against medical advice; NICU=neonatal intensive care unit; RDS= respiratory distress syndrome; SCBU=semi-intensive care baby unit.

### Use of data

Data entered in the database were analysed at intervals of eight months and made available to the local coordinator. Findings of the database were presented and discussed in two large workshops with staff from De Soysa Hospital and from other large maternity units in Sri Lanka. Participants to these meetings included: senior obstetricians, neonatologists, postgraduate trainees and other middle level medical personnel, nurses, midwives and other staff).

During these meetings, key indicators suggesting possible gaps in quality of care were identified, and recommendations for improvement were discussed and agreed upon (**Table 5**). Indicators identified as requiring actions to improve quality of care were: high rate of induction of labour (24.6%), of CS (30.0%) and episiotomy (56.1%); relatively high maternal near-miss cases (3.4%); relatively high rate of preterm babies (9.4%), low-birth-weight babies (16.5%), stillbirth (0.97%), and of total deaths in newborns (1.98%). Recommendations developed focused on the key indicators identified and included the use of checklists to standardise case management, training, clinical audits, and more information for patients. Smaller meetings were also organised, in order to develop and agree specific tools and procedures to put in practices the recommendations agreed (such as for developing the information pamphlet on VBAC, and the checklists to review obstetric emergencies).

**Table 5. Use of data for improving quality of care**

| Key Indicators identified                                                                                                                                                                                                                                                                                                                                                                                            | Agreed recommendations for quality improvement                                                                                                                                                                                                                                                                                                                                                                                                                                                                                                                                                                                                                                                                                                                                                                                                                                                                                                                                                                                                                                                                                                                                                                                                                                                                                                                                                                                      |
|----------------------------------------------------------------------------------------------------------------------------------------------------------------------------------------------------------------------------------------------------------------------------------------------------------------------------------------------------------------------------------------------------------------------|-------------------------------------------------------------------------------------------------------------------------------------------------------------------------------------------------------------------------------------------------------------------------------------------------------------------------------------------------------------------------------------------------------------------------------------------------------------------------------------------------------------------------------------------------------------------------------------------------------------------------------------------------------------------------------------------------------------------------------------------------------------------------------------------------------------------------------------------------------------------------------------------------------------------------------------------------------------------------------------------------------------------------------------------------------------------------------------------------------------------------------------------------------------------------------------------------------------------------------------------------------------------------------------------------------------------------------------------------------------------------------------------------------------------------------------|
| <p><b>Maternal</b></p> <ul style="list-style-type: none"> <li>- High rate of induction of labour (24.6%)</li> <li>- High rate of CS (30.0%), with high rates in Robson's group 1, 3, 5</li> <li>- Low rate of VBAC (17.1%)</li> <li>- High rate of episiotomy (56.1%)</li> <li>- Relatively high rate of near-miss cases</li> <li>- Low reported rate 3<sup>rd</sup>-4<sup>th</sup> degree perineal tears</li> </ul> | <ul style="list-style-type: none"> <li>• Checklist to be filled by the doctor in charge for each individual case of induction of labour, specifying indications, methods, timing. Data to be reviewed regularly. Consultant to make decision on IOL</li> <li>• Dedicated workshops on CS, discussing local data and international recommendations (15,16,24).</li> <li>• Training workshops to help improve the CTG interpretation skills. Stickers to help CTG interpretation. Improved communication regarding CTG interpretation from midwives to medical officers using "WhatsApp/Viber".</li> <li>• Training workshop to develop a consensus on how to manage foetal distress and poor progress of labour.</li> <li>• Establishment of a nurse-lead VBAC counselling clinic and development of a VBAC leaflet for patients. Education for staff, including community midwives, on methods of counselling.</li> <li>• Implementation of a selective episiotomy policy; training of midwives and medical staff on appropriate indication for episiotomy.</li> <li>• Doctors to identify clearly near-miss cases. Establishment of a system for regular internal review of near-miss cases.</li> <li>• Development of checklists for systematic analysis of obstetric emergencies against international standards of care.</li> <li>• Training of midwives on review and reporting the perineum status after delivery.</li> </ul> |
| <p><b>Newborn</b></p> <ul style="list-style-type: none"> <li>- High rate of preterm (9.4%)</li> <li>- High rate of low birth weight (16.5%)</li> <li>- High rate of stillbirth (0.97%)</li> <li>- High rate of newborns with complications (12.2%)</li> <li>- High rate of total deaths in newborns (1.98%)</li> </ul>                                                                                               | <ul style="list-style-type: none"> <li>• Improve diffusion of national and international guidelines of antenatal care (38).</li> <li>• Improve prenatal ultrasound diagnosis of SGA and of malformation.</li> <li>• Development of checklist for systematic analysis of newborn care against international standards of care.</li> <li>• Training on newborn resuscitation.</li> </ul>                                                                                                                                                                                                                                                                                                                                                                                                                                                                                                                                                                                                                                                                                                                                                                                                                                                                                                                                                                                                                                              |

Abbreviations: CTG: cardiotocography; SGA: small for gestational age; VBAC: vaginal birth after cesarean section.

## Lessons learned

Results of this study were discussed among partners, and a series of lessons learned, and way forward were drawn (**Box 2**). Overall the key lesson was that data collection was feasible, it resulted in a large amount of data with an acceptable quality, and in the development of some recommendations for quality improvement; however, use of data could be further improved. Drawing on this experience, and on other experiences reported in literature (7,17-22), some concrete actions that may further help improving use of data in the future were discussed (**Box 2**). Although a simplified version of the Yellow Form was discussed, it was difficult to identify what variables to drop: despite the data collection form including 150 variables, when findings were discussed clinicians tended to request even more additional information.

### Box 2. Lessons learned and way forward

#### *Key lessons*

1. Data collection was feasible and resulted in a large amount of data with an acceptable quality, and in the development of some recommendations for QI; however, use of data could be further improved.
2. Standard Operating procedures (SOP) and regular data monitoring and evaluation (M&E) was crucial.
3. One data collector was sufficient to collect data in the study setting, but one additional person was needed to ensure regular M&E.
4. Ensuring concrete use of data for QI is not to be taken for granted and it requires building a system of coordination to facilitate data diffusion and discussion.
5. In general, clinicians showed low interest in statistical data compared to clinical subjects. Clinicians without training or without a particular interest in QI methods, were poorly interested in using statistical data for QI purposes, and were more attracted by new technologies. Appropriate involvement of staff (eg training, participation to projects, assignment of specific responsibilities), is needed to develop a local team who will act as drivers in QI.
6. It is difficult to find the optimal golden balance between a “simple” data collection form (ie collecting few variables) and an “informative” data collection form that satisfies clinicians (ie collecting a large number of variables).

#### *Way forward*

1. The “Yellow Form” could be incorporated into the patient file; data collection could be made part of the duties of the hospital staff in charge of each single case. This should facilitate sustainability and may further improve quality of data.
2. All staff involved in data collections should be made aware of the standard case definitions.
3. Regular local M&E should be ensured to avoid drops in data quality.
4. Adding in the database functions of automatic reporting may probably increase local ownership and facilitate use of data.
5. Other forms of diffusing data, rather than workshops, may be explored, such as use of posters or newsletters.

6. With the number of recommendations increasing, the establishment of a technical group for QI within the hospital, with clear roles and responsibilities becomes mandatory to ensure their implementation.
7. To ensure translation into actions of recommendations arising from data discussion, a system for regular follow up should to be put in place. This will probably be more effective if embedded in a national system for quality assurance in maternal and child health.

Abbreviations: M&E= monitoring and evaluation; QI= quality improvement; SOP= standard operating procedures.

## DISCUSSION

This is the first individual patient database established for comprehensive prospective data collection on births in Sri Lanka. From a review of existing literature, we could identify very few databases prospectively collecting a large number of individual patient variables on hospital births. Of these, most data collection systems were established in high income countries, or in upper middle-income countries such as Brazil, Peru and South Africa (17-19), while we were able to identify only two systems for prospective collection of individual maternal and newborn variables across the time of birth in low or lower middle-income countries (20,21), and both collected data from a single facility (20-22). In respect of the average hospital administrative data, even in high income countries, the dataset implemented in this pilot study contains a large number of variables, such as maternal risk factors, that can be used for evaluating the case mix and for adjusting for confounders (7,19).

Most importantly, routine use of data to improve case management and organization of care is still not a common practice, even in countries with well-established data collection systems (7). Despite there being some good examples of how routine data collection systems are used to shape policies in low and middle-income countries (LMIC), for example in the paediatric field (23), these are very limited in number. As such, the main value of this study is that it provides an example of how data can be used for discussing and agreeing on recommendations for improving the quality of care.

This study aimed at reporting the feasibility of implementing an accurate system of data collection and not at presenting extensively the database findings. Additional analyses (such as a detailed analysis of practices and outcomes related to CS according to the Robson Groups (24), and other multivariate and sub-group analyses) will be the object of future publications. Many of the findings of the descriptive analysis reported in this paper - such as the rate of maternal deaths, induction of

1  
2  
3 labour and low birth weight babies - are not overall surprising and rather in line with other country  
4 reports (5,8-13,22,25-29). Results reflect the specificity of the setting: De Soysa Hospital is the  
5 largest referral maternity hospital in Sri Lanka, and case mix, as well as local practices, do not  
6 necessarily represent the average in the country. For example, the rate of induction of labour, CS  
7 and near-miss cases, although being relatively high compared to international standards, actually  
8 are below the national reported average (12,13,25,28). Rate of stillbirth and newborn deaths after  
9 birth may appear high when compared to national statistics (the most recent national report  
10 provides a figure of stillbirth rate of 5.9/1000 (30)), and this may be due both to the case mix (55.7%  
11 of pregnancies at the De Soysa Hospital had at least one risk factor, and about half of cases of  
12 stillbirth had a major malformation), and to the fact that medical termination of pregnancy in Sri Lanka  
13 is allowed only to save the life of the mother, but not for any condition of foetal impairment, not  
14 even major malformations (31). The rate of post-partum haemorrhage, appeared to be lower than  
15 what expected for LMIC according to international literature (32), but it was double checked in the  
16 hospital registers and found to be correct (Table 1). The low prevalence of DVT and PE may be  
17 due to the fact that these events are less frequent in the Asian population compared to others, or to  
18 under-reporting (33,34). It must be acknowledged that for most of the variables collected - such as  
19 risk factors, episiotomy, reasons for induction of labour/operative deliveries, newborn  
20 complications, etc, there is no other system of official data in the whole country. The main merit of  
21 the database was that it provided to hospital staff, for the first time in Sri Lanka, a large number of  
22 objective indicators on local practices and outcomes, thus providing the evidence base for  
23 discussing the appropriateness of the care delivered at the facility level. Although  
24 recommendations developed may not cover all actions needed to improve quality of care, they  
25 were agreed locally, and as such they represent an important step forward in the local culture of  
26 quality improvement and in the local ownership of the whole quality improvement process.

27  
28  
29  
30  
31  
32  
33  
34  
35  
36  
37  
38  
39  
40  
41 In the future, the database may help answering more questions (such as appropriateness of  
42 hospital practices related to CS or to induction of labour); it may inform the development of  
43 additional recommendations to improve quality of care, and it may provide a way of monitoring  
44 trends over time of patient characteristics, hospital practices and health outcomes.

45  
46  
47  
48 Given the paucity of efficient data collection systems in LMIC (6,7), lessons from this study may be  
49 of interest to other researchers and policy makers. However, in generalising the finding of this  
50 study to other settings, key characteristics of this project must be acknowledged. First, in this study  
51 dedicated staff was appointed for data collection and entry. Second, supervision was provided, and  
52 data collection was monitored regularly. Data collection that proved accurate under these  
53 conditions may fail to have good results if these minimum conditions are not guaranteed, especially  
54 if monitoring is not ensured.

1  
2  
3  
4 The experience accumulated so far in this pilot experience at De Soysa Hospital may help scaling  
5 up the data collection system in other maternity units in the country. The Sustainable Development  
6 Goals (SDG) in countries with low baseline maternal mortality, such as Sri Lanka, include  
7 “achieving access to quality essential health-care services” (35). Target-setting is accompanied by  
8 the need for improving measurement approaches and data quality to allow more accurate tracking  
9 of country progress as well as causes of death (36). The implementation of a system for individual  
10 patient data collection on hospital deliveries in other maternities in Sri Lanka will allow comparing  
11 several variables (patient characteristics, process outcomes and health outcomes) among different  
12 geographical regions, settings, and over time, and data generated could be used to improve overall  
13 national practices. The data collection form utilised in this project was designed together with  
14 professionals from different maternity unit in Sri Lanka, therefore, when adapting it to other  
15 facilities, only minor adaptations may be required. However, scaling up will require a good  
16 mechanism for coordination, beside further testing to identify the optimal methods for data  
17 collection in other settings (such as smaller maternity units). Furthermore, it will be crucial to  
18 establish functional mechanisms (such as regular data audits) to ensure that information generated  
19 from the database are actually used in practice to improve quality of health care. As for many other  
20 types of data collection, the main problem may be that data are not actually utilised (7).

21  
22  
23  
24  
25  
26  
27  
28  
29  
30  
31  
32  
33  
34  
35  
36  
37  
38  
39  
40  
41  
42  
43  
44  
45  
46  
47  
48  
49  
50  
51  
52  
53  
54  
55  
56  
57  
58  
59  
60  
61  
62  
63  
64  
65  
66  
67  
68  
69  
70  
71  
72  
73  
74  
75  
76  
77  
78  
79  
80  
81  
82  
83  
84  
85  
86  
87  
88  
89  
90  
91  
92  
93  
94  
95  
96  
97  
98  
99  
100  
101  
102  
103  
104  
105  
106  
107  
108  
109  
110  
111  
112  
113  
114  
115  
116  
117  
118  
119  
120  
121  
122  
123  
124  
125  
126  
127  
128  
129  
130  
131  
132  
133  
134  
135  
136  
137  
138  
139  
140  
141  
142  
143  
144  
145  
146  
147  
148  
149  
150  
151  
152  
153  
154  
155  
156  
157  
158  
159  
160  
161  
162  
163  
164  
165  
166  
167  
168  
169  
170  
171  
172  
173  
174  
175  
176  
177  
178  
179  
180  
181  
182  
183  
184  
185  
186  
187  
188  
189  
190  
191  
192  
193  
194  
195  
196  
197  
198  
199  
200  
201  
202  
203  
204  
205  
206  
207  
208  
209  
210  
211  
212  
213  
214  
215  
216  
217  
218  
219  
220  
221  
222  
223  
224  
225  
226  
227  
228  
229  
230  
231  
232  
233  
234  
235  
236  
237  
238  
239  
240  
241  
242  
243  
244  
245  
246  
247  
248  
249  
250  
251  
252  
253  
254  
255  
256  
257  
258  
259  
260  
261  
262  
263  
264  
265  
266  
267  
268  
269  
270  
271  
272  
273  
274  
275  
276  
277  
278  
279  
280  
281  
282  
283  
284  
285  
286  
287  
288  
289  
290  
291  
292  
293  
294  
295  
296  
297  
298  
299  
300  
301  
302  
303  
304  
305  
306  
307  
308  
309  
310  
311  
312  
313  
314  
315  
316  
317  
318  
319  
320  
321  
322  
323  
324  
325  
326  
327  
328  
329  
330  
331  
332  
333  
334  
335  
336  
337  
338  
339  
340  
341  
342  
343  
344  
345  
346  
347  
348  
349  
350  
351  
352  
353  
354  
355  
356  
357  
358  
359  
360  
361  
362  
363  
364  
365  
366  
367  
368  
369  
370  
371  
372  
373  
374  
375  
376  
377  
378  
379  
380  
381  
382  
383  
384  
385  
386  
387  
388  
389  
390  
391  
392  
393  
394  
395  
396  
397  
398  
399  
400  
401  
402  
403  
404  
405  
406  
407  
408  
409  
410  
411  
412  
413  
414  
415  
416  
417  
418  
419  
420  
421  
422  
423  
424  
425  
426  
427  
428  
429  
430  
431  
432  
433  
434  
435  
436  
437  
438  
439  
440  
441  
442  
443  
444  
445  
446  
447  
448  
449  
450  
451  
452  
453  
454  
455  
456  
457  
458  
459  
460  
461  
462  
463  
464  
465  
466  
467  
468  
469  
470  
471  
472  
473  
474  
475  
476  
477  
478  
479  
480  
481  
482  
483  
484  
485  
486  
487  
488  
489  
490  
491  
492  
493  
494  
495  
496  
497  
498  
499  
500  
501  
502  
503  
504  
505  
506  
507  
508  
509  
510  
511  
512  
513  
514  
515  
516  
517  
518  
519  
520  
521  
522  
523  
524  
525  
526  
527  
528  
529  
530  
531  
532  
533  
534  
535  
536  
537  
538  
539  
540  
541  
542  
543  
544  
545  
546  
547  
548  
549  
550  
551  
552  
553  
554  
555  
556  
557  
558  
559  
560  
561  
562  
563  
564  
565  
566  
567  
568  
569  
570  
571  
572  
573  
574  
575  
576  
577  
578  
579  
580  
581  
582  
583  
584  
585  
586  
587  
588  
589  
590  
591  
592  
593  
594  
595  
596  
597  
598  
599  
600  
601  
602  
603  
604  
605  
606  
607  
608  
609  
610  
611  
612  
613  
614  
615  
616  
617  
618  
619  
620  
621  
622  
623  
624  
625  
626  
627  
628  
629  
630  
631  
632  
633  
634  
635  
636  
637  
638  
639  
640  
641  
642  
643  
644  
645  
646  
647  
648  
649  
650  
651  
652  
653  
654  
655  
656  
657  
658  
659  
660  
661  
662  
663  
664  
665  
666  
667  
668  
669  
670  
671  
672  
673  
674  
675  
676  
677  
678  
679  
680  
681  
682  
683  
684  
685  
686  
687  
688  
689  
690  
691  
692  
693  
694  
695  
696  
697  
698  
699  
700  
701  
702  
703  
704  
705  
706  
707  
708  
709  
710  
711  
712  
713  
714  
715  
716  
717  
718  
719  
720  
721  
722  
723  
724  
725  
726  
727  
728  
729  
730  
731  
732  
733  
734  
735  
736  
737  
738  
739  
740  
741  
742  
743  
744  
745  
746  
747  
748  
749  
750  
751  
752  
753  
754  
755  
756  
757  
758  
759  
760  
761  
762  
763  
764  
765  
766  
767  
768  
769  
770  
771  
772  
773  
774  
775  
776  
777  
778  
779  
780  
781  
782  
783  
784  
785  
786  
787  
788  
789  
790  
791  
792  
793  
794  
795  
796  
797  
798  
799  
800  
801  
802  
803  
804  
805  
806  
807  
808  
809  
810  
811  
812  
813  
814  
815  
816  
817  
818  
819  
820  
821  
822  
823  
824  
825  
826  
827  
828  
829  
830  
831  
832  
833  
834  
835  
836  
837  
838  
839  
840  
841  
842  
843  
844  
845  
846  
847  
848  
849  
850  
851  
852  
853  
854  
855  
856  
857  
858  
859  
860  
861  
862  
863  
864  
865  
866  
867  
868  
869  
870  
871  
872  
873  
874  
875  
876  
877  
878  
879  
880  
881  
882  
883  
884  
885  
886  
887  
888  
889  
890  
891  
892  
893  
894  
895  
896  
897  
898  
899  
900  
901  
902  
903  
904  
905  
906  
907  
908  
909  
910  
911  
912  
913  
914  
915  
916  
917  
918  
919  
920  
921  
922  
923  
924  
925  
926  
927  
928  
929  
930  
931  
932  
933  
934  
935  
936  
937  
938  
939  
940  
941  
942  
943  
944  
945  
946  
947  
948  
949  
950  
951  
952  
953  
954  
955  
956  
957  
958  
959  
960  
961  
962  
963  
964  
965  
966  
967  
968  
969  
970  
971  
972  
973  
974  
975  
976  
977  
978  
979  
980  
981  
982  
983  
984  
985  
986  
987  
988  
989  
990  
991  
992  
993  
994  
995  
996  
997  
998  
999  
1000

Limitations of this study include that, within the project timelines, it did not aim at following up the impact of the recommendations developed. Future longer-term studies will be needed to assess changes in key indicators over time. Although the study was single-centre, it has the merit of reporting both technical feasibility related to the database implementation, quality of data (completeness and accuracy), lessons learned, and, actual use of data – the latter three being often neglected issues-.

## CONCLUSIONS

This pilot study on the implementation of an individual patient database on hospital deliveries in Sri Lanka proved that in this setting a large quantity of data could be collected in an accurate way. The study is an example on how data can be used to discuss hospital practices, identify gaps in quality of care, and agree recommendations for improving the quality of hospital case management. More implementation research is needed to identify the best model for scaling up data collection to other maternities in Sri Lanka and in other low-middle income countries. More research in general should report on the actual use of data.

### **Acknowledgments**

We would like to thank all the hospitals staff who participated in the study. Our special thanks go to H K Dharmasiri, Medical Records Officer, De Soysa Hospital without whose steadfast support this project would not have been possible.

### **Funding**

This study was funded by a grant from the GREAT Network, Canadian Institutes of Health Research, St. Michael's Hospital, Toronto, by the Institute for Maternal and Child Health IRCCS Burlo Garofolo.

### **Author contributions**

ML, HS and MP conceived the study and procured funds

ML, HS, NG, RVG, MJ, NS, and MP developed the data collections tools

RF, AS and FRI collected data

BC, HW and ML analysed the data

All authors interpreted data and contributed to the manuscript

ML wrote the first draft of the paper, all authors contributed to the final version of the paper



## REFERENCES

1. Tunçalp O, Were WM, MacLennan C, Oladapo OT, Gülmezoglu AM, Bahl R, Daelmans B, Mathai M, Say L, Kristensen F, Temmerman M, Bustreo F. Quality of care for pregnant women and newborns-the WHO vision. *BJOG*. 2015 Jul;122(8):1045-9.
2. World Health Organization. Standards for improving quality of maternal and newborn care in health facilities. Geneva: World Health Organization, 2016. Available at [http://www.who.int/maternal\\_child\\_adolescent/documents/improving-maternal-newborn-care-quality/en/](http://www.who.int/maternal_child_adolescent/documents/improving-maternal-newborn-care-quality/en/) (accessed March 13, 2018)
3. World Health Organization Strategies toward ending preventable maternal mortality (EPMM). Geneva: World Health Organization, 2015 Available at [http://who.int/reproductivehealth/topics/maternal\\_perinatal/epmm/en/](http://who.int/reproductivehealth/topics/maternal_perinatal/epmm/en/) (accessed March 13, 2018)
4. Graham WJ, Ahmed S, Stanton C, Abou-Zahr CL, Campbell OMR. Measuring maternal mortality: an overview of opportunities and options for developing countries. *BMC Medicine* 2008;6:12
5. Trends in maternal mortality 1990–2013. Geneva: World Health Organization; 2014 Available at [http://apps.who.int/iris/bitstream/10665/112682/2/9789241507226\\_eng.pdf?ua=1](http://apps.who.int/iris/bitstream/10665/112682/2/9789241507226_eng.pdf?ua=1), (accessed March 13, 2018)
6. Country health information systems: a review of the current situation and trends. Geneva: World Health Organization; 2011
7. Geary RS, Knight HE, Carroll FE, Gurol-Urganci I, Morris E, Cromwell DA, van der Meulen JH. A step-wise approach to developing indicators to compare the performance of maternity units using hospital administrative data. *BJOG*. 2017 Nov 6. doi: 10.1111/1471-0528.15013.
8. The World Bank. Sri Lanka overview. Available at <http://www.worldbank.org/en/country/srilanka/overview> (accessed March 23, 2018)
9. Analyses of Maternal deaths 2015. Family Health Bureau Ministry of Health and Indigenous Medicine, Sri Lanka, Colombo 2014. Available at [http://fhb.health.gov.lk/web/index.php?option=com\\_phocadownload&view=category&id=40:maternal-child-morbidity-mortality-surveillance&Itemid=150&lang=en#](http://fhb.health.gov.lk/web/index.php?option=com_phocadownload&view=category&id=40:maternal-child-morbidity-mortality-surveillance&Itemid=150&lang=en#) (accessed March 25, 2018)

- 1  
2  
3 10. Unicef Sri Lanka Statistics. Available at  
4 [https://www.unicef.org/infobycountry/sri\\_lanka\\_statistics.html#122](https://www.unicef.org/infobycountry/sri_lanka_statistics.html#122) (accessed March  
5 23, 2018)  
6
- 7  
8 11. Kapila Jayaratne. Maternal Death Surveillance and Response (MDSR) – outcomes  
9 of 2014. Available at  
10 [http://fhb.health.gov.lk/web/index.php?option=com\\_phocadownload&view=category](http://fhb.health.gov.lk/web/index.php?option=com_phocadownload&view=category&id=40:maternal-child-morbidity-mortality-surveillance&Itemid=150&lang=en#)  
11 [&id=40:maternal-child-morbidity-mortality-surveillance&Itemid=150&lang=en#](http://fhb.health.gov.lk/web/index.php?option=com_phocadownload&view=category&id=40:maternal-child-morbidity-mortality-surveillance&Itemid=150&lang=en#)  
12 (accessed March 25, 2018)  
13
- 14  
15 12. Goonewardene M, Kumara DMA, Jathun Arachchi DR, Vithanage R, Wijeweera R.  
16 The rising trend in caesarean section rates: should we and can we reduce it? Sri  
17 Lanka Journal of Obstetrics and Gynaecology 2012; 34: 11-18  
18
- 19  
20 13. Vogel JP, Souza JP, Gülmezoglu AM. Patterns and Outcomes of Induction of  
21 Labour in Africa and Asia: a secondary analysis of the WHO Global Survey on  
22 Maternal and Neonatal Health. PLoS One. 2013 Jun 3;8(6):e65612. doi:  
23 10.1371/journal.pone.0065612.  
24
- 25  
26 14. Epidata software. Available at <http://www.epidata.dk/> (accessed March 13, 2017)  
27
- 28  
29 15. Robson M, Hartigan L, Murphy M. Methods of achieving and maintaining an  
30 appropriate caesarean section rate. Best Pract Res Clin Obstet Gynaecol. 2013  
31 Apr;27(2):297-308.  
32
- 33  
34 16. Robson M, Murphy M, Byrne F. Quality assurance: The 10-Group Classification  
35 System (Robson classification), induction of labor, and cesarean delivery. Int J  
36 Gynaecol Obstet. 2015 Oct;131 Suppl 1:S23-7.  
37
- 38  
39 17. Allanson ER, Muller M, Pattinson RC. Causes of perinatal mortality and associated  
40 maternal complications in a South African province: challenges in predicting poor  
41 outcomes. BMC Pregnancy Childbirth. 2015 Feb 15;15:37. doi:10.1186/s12884-  
42 015-0472-9.  
43
- 44  
45 18. Jorge MH, Gotlieb SL, Soboll ML, de Almeida MF, Latorre Mdo R. [An information  
46 system on live births and the use of its data in epidemiology and health statistics].  
47 Rev Saude Publica. 1993 Dec;27 Suppl:1-44.  
48
- 49  
50 19. Statnikov Y, Ibrahim B, Modi N. A systematic review of administrative and clinical  
51 databases of infants admitted to neonatal units. Arch Dis Child Fetal Neonatal Ed.  
52 2017 May;102(3):F270-F276  
53
- 54  
55 20. Seale AC, Barsosio HC, Koech AC, Berkley JA; KIPMAT group. Embedding  
56 surveillance into clinical care to detect serious adverse events in pregnancy.  
57 Vaccine. 2015 Nov 25;33(47):6466-8.  
58  
59  
60

- 1
  - 2
  - 3
  - 4
  - 5
  - 6
  - 7
  - 8
  - 9
  - 10
  - 11
  - 12
  - 13
  - 14
  - 15
  - 16
  - 17
  - 18
  - 19
  - 20
  - 21
  - 22
  - 23
  - 24
  - 25
  - 26
  - 27
  - 28
  - 29
  - 30
  - 31
  - 32
  - 33
  - 34
  - 35
  - 36
  - 37
  - 38
  - 39
  - 40
  - 41
  - 42
  - 43
  - 44
  - 45
  - 46
  - 47
  - 48
  - 49
  - 50
  - 51
  - 52
  - 53
  - 54
  - 55
  - 56
  - 57
  - 58
  - 59
  - 60
21. Bergsjø P, Mlay J, Lie RT, Lie-Nielsen E, Shao JF. A medical birth registry at Kilimanjaro Christian Medical Centre. *East Afr J Public Health*. 2007 Apr;4(1):1-4.
22. Sørbye IK, Vangen S, Oneko O, Sundby J, Bergsjø P. Caesarean section among referred and self-referred birthing women: a cohort study from a tertiary hospital, northeastern Tanzania. *BMC Pregnancy Childbirth*. 2011 Jul 28;11:55.
23. PNG National Department of Health and Paediatric Society of PNG. Papua New Guinea Child Health Policy and Plan 2009 - 2020 (Updated 2015). Port Moresby, Papua New Guinea. 2015
24. World Health Organization. Robson Classification: Implementation Manual. World Health Organization, Geneva 2017
25. Senanayake H, Dias T, Jayawardena A. Maternal mortality and morbidity: epidemiology of intensive care admissions in pregnancy. *Best Pract Res Clin Obstet Gynaecol*. 2013 Dec;27(6):811-20.
26. Jayaratne,K.; Agampodi,S.; Jayathilake,A.; Prerera,D. Moving beyond maternal deaths: Maternal near-misses in Sri Lanka. *BJOG: Conference: RCOG World Congress 2015*. Brisbane, QLD Australia. Conference Start: 20150412. Conference End: 20150415. Conference Publication: (var.pagings). 122
27. Tunçalp O, Hindin MJ, Souza JP, Chou D, Say L. The prevalence of maternal near-miss : a systematic review. *BJOG*. 2012 May;119(6):653-61. doi:10.1111/j.1471-0528.2012.03294.x. Review. PubMed PMID: 22489760 .
28. Lawn JE, Blencowe H, Waiswa P, Amouzou A, Mathers C, Hogan D, Flenady V, Frøen JF, Qureshi ZU, Calderwood C, Shiekh S, Jassir FB, You D, McClure EM, Mathai M,Cousens S; Lancet Ending Preventable Stillbirths Series study group; Lancet Stillbirth Epidemiology investigator group. Stillbirths: rates, risk factors, and acceleration towards 2030. *Lancet*. 2016 Feb 6;387(10018):587-603 .
29. Vogel JP, Betrán AP, Vindevoghel N, Souza JP, Torloni MR, Zhang J, Tunçalp Ö, Mori R, Morisaki N, Ortiz-Panozo E, Hernandez B, Pérez-Cuevas R, Qureshi Z, Gülmezoglu AM, Temmerman M; WHO Multi-Country Survey on Maternal and Newborn, Health Research Network. Use of the Robson classification to assess caesarean section trends in 21 countries: a secondary analysis of two WHO multicountry surveys. *Lancet Glob Health*. 2015 May;3(5):e260-70.
30. Maternal & Child Morbidity, Mortality Surveillance. Family Health Bureau Ministry of Health and Indigenous Medicine, Sri Lanka, Colombo 2014. Available at [http://fhb.health.gov.lk/web/index.php?option=com\\_phocadownload&view=category&id=40:maternal-child-morbidity-mortality-surveillance&Itemid=150&lang=en#](http://fhb.health.gov.lk/web/index.php?option=com_phocadownload&view=category&id=40:maternal-child-morbidity-mortality-surveillance&Itemid=150&lang=en#) (accessed March 25, 2018)

- 1  
2  
3 31. United Nations. Abortion policy, a global review. Available at  
4 <http://www.un.org/esa/population/publications/abortion/profiles.htm> (accessed  
5 March 25, 2018)  
6
- 7 32. World Health Organization. WHO recommendations for the prevention and  
8 treatment of postpartum haemorrhage. World Health Organization, Geneva 2012.  
9 Available at  
10 [http://apps.who.int/iris/bitstream/handle/10665/75411/9789241548502\\_eng.pdf?seq](http://apps.who.int/iris/bitstream/handle/10665/75411/9789241548502_eng.pdf?sequence=1)  
11 [uence=1](http://apps.who.int/iris/bitstream/handle/10665/75411/9789241548502_eng.pdf?sequence=1) (accessed on April 10, 2018)  
12
- 13 33. Sheriffdeen AH, Wijeyaratne M. Deep vein thrombosis in Sri Lankans--time to  
14 take notice. *Ceylon Med J*. 2001 Mar;46(1):3-5  
15
- 16 34. Al-Ani F, Teng Y, Iansavichene A, Lazo-Langner A. Evaluating the Effect of  
17 Ethnicity on the Risk of Venous Thromboembolism (VTE): A Systematic Review.  
18 *Blood* 2015 126:4714.  
19
- 20 35. Senanayake H, Goonewardene M, Ranatunga A, Hattotuwa R, Amarasekera S,  
21 Amarasinghe I. Achieving Millennium Development Goals 4 and 5 in Sri Lanka.  
22 *BJOG* 2011;118 (Suppl. 2):78–87  
23
- 24 36. United Nations. General assembly. Transforming our world: the 2030 Agenda for  
25 Sustainable Development General Assembly, 25 Se September 2015. Available at  
26 [http://www.un.org/ga/search/view\\_doc.asp?symbol=A/RES/70/1&Lang=E](http://www.un.org/ga/search/view_doc.asp?symbol=A/RES/70/1&Lang=E)  
27 (accessed March 13, 2017)  
28
- 29 37. World Health Organization 2011. Evaluating the quality of care for severe  
30 pregnancy complications: the WHO near-miss approach for maternal health.  
31 Geneva: World Health Organization, 2011.  
32
- 33 38. World Health Organization 2016. WHO recommendations on antenatal care for a  
34 positive pregnancy experience. Geneva: World Health Organization, 2016.  
35 Available at  
36 [http://www.who.int/reproductivehealth/publications/maternal\\_perinatal\\_health/anc-](http://www.who.int/reproductivehealth/publications/maternal_perinatal_health/anc-positive-pregnancy-experience/en/)  
37 [positive-pregnancy-experience/en/](http://www.who.int/reproductivehealth/publications/maternal_perinatal_health/anc-positive-pregnancy-experience/en/) (accessed on April 16, 2018)  
38  
39  
40  
41  
42  
43  
44  
45  
46  
47  
48  
49  
50  
51  
52  
53  
54  
55  
56  
57  
58  
59  
60

1 Supplementary files

2  
3 **Implementation of an individual-patient prospective**  
4  
5 **database of hospital births in Sri Lanka and its use for**  
6  
7 **improving quality of care**  
8  
9  
10  
11  
12  
13  
14  
15

16 List of files

17  
18  
19 **Appendix 1. Yellow Form** **Page 2**

20  
21 **Appendix 2. Missing variables** **Page 5**  
22  
23  
24  
25  
26  
27  
28  
29  
30  
31  
32  
33  
34  
35  
36  
37  
38  
39  
40  
41  
42  
43  
44  
45  
46  
47  
48  
49  
50  
51  
52  
53  
54  
55  
56  
57  
58  
59  
60

# Appendix 1. YELLOW FORM

Complete this chart AT DELIVERY (white part) and AT DISCHARGE (dotted part)  Soya  Other

If other hosp, add name: \_\_\_\_\_

Adm (dd/mm/yy)  Deliv  Disch  BHT 15-

Age (years)  Education  No schooling  Primary (Grades 1-6)  Secondary (Grades 6-10)  Higher

Working status  No data  Working  Housewife Marital status  Married  Unmarried  Unmarried living together

GA at delivery (wks/days)  GA estimated with US  N  Y  Missing

Gravida (pregnancies)<sup>1</sup>  Para<sup>1</sup>  Born alive<sup>1</sup>  (<sup>1</sup> For para / born alive – exclude current pregnancy)

BMI at booking  Underweight (< 18.4)  Normal (18.5 - 22.9)  Overweight (23 - 27.4)  Obese (> 27.5)

**(Risk factors at time of delivery-check all)<sup>2</sup>**

- Multiple pregn  N  Y PreGes Hyperten<sup>3</sup>  N  Y Ges Hyperten<sup>3</sup> no proteinur  N  Y
- Pre-ecl NOT SEV  N  Y Pre-ecl SEV  N  Y Eclampsia  N  Y
- Chorioamnionitis  N  Y Major fetal malformation/s  N  Y IUGR/SGA<sup>4</sup>  N  Y
- Pregeste Diab  N  Y GDM in diet  N  Y GDM, in drug therapy  N  Y
- Maternal-cardiac disease<sup>2</sup>  N  Y Maternal hypothyroidism  N  Y Polihydramnios  N  Y
- Oligodramnion  N  Y APH/major plac previa/accret  N  Y Severe Anaemia (Hb<7)  N  Y
- Other  N  Y

If Other maternal conditions, specify \_\_\_\_\_

If Other fetal conditions, specify \_\_\_\_\_

If Other, specify \_\_\_\_\_

**One tick only**

- Steroids<sup>5</sup>  N  complete  incomplete  dose unclear
- Previous CS  N  Y  Missing Number \_\_\_\_\_
- If prev CS, trial of labour  No previous CS  N  Y
- Presentation  Cephalic  Breech  Other  Missing
- Labour onset  Spont  Induc (even if failed)  PreLabCS<sup>6</sup>  Missing
- Delivery mode  Vag spont  Vag forcep/ventuse  CS  Missing
- If CS, type  No CS  Emerg  Elect  Missing

**If IOL, main indication given (one tick only)**

- 1 No IOL  2 Post-term  3 Prelab rupture memb  4 Diabetes on diet
- 5 Diabet on insulin/metform  6 Macrosomy at US<sup>7</sup>  7 IUGR/SGA<sup>4</sup>  8 Multiple pregnancies
- 9 Maternal Age > 40 y  10 Hypert/Pre ecl/Eclam  11 Cardiac disease  12 Oligoidramn
- 13 Other add \_\_\_\_\_  14 Prolonged latent phase/ painful contractions not in labour  0 Missing

**If IOL, mode of induction (one tick only)<sup>8</sup>**

- 1 No IOL  2 PGE  3 Oxytocin  4 Foley
- 5 ARM  6 PGE+ oxytocin ± ARM  7 Foley+ARM/oxytocin  8 Foley + PGE
- 9 ARM + oxytocin  10 Other add: \_\_\_\_\_  0 Missing

**If operative delivery, main indication (one tick only)**

- 1 No operative del  2 CTG anom/suspected fetal distress  3 Failed induction
- 4 Distocya 1st  5 Distocya 2nd stage<sup>10</sup>  6 Past CS
- 7 Breech/abnormal lie  8 History of subfertility  9 APH/major placenta previa
- 10 Cardiac disease  11 Prelab diagn CPD/short mother  12 Multiple pregnancies
- 13 IUGR  14 Pre term  15 Diab
- 16 Hypert/Pre ecl/Eclam  17 Maternal request  18 Other
- 0 Missing

If other fetal cause specify \_\_\_\_\_

If other maternal specify \_\_\_\_\_

If other cause \_\_\_\_\_

- Episiotomy  N  Y  Missing
- Analges in labour<sup>9</sup>  N  Petidine  Epid  Spin  Mix  Other
- If CS, anaesthesia  No CS  Spinal/epid  General
- 3<sup>rd</sup> Stage manag  Active  No active  Missing
- Removal placenta  Spont  Manual  ERPC  Missing
- Operator del  Nurse  MW  HO  SHO  Reg  Con  Missing

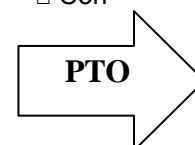



**Complications (one tick)**

|                             |                                   |                                |                                     |                                                       |
|-----------------------------|-----------------------------------|--------------------------------|-------------------------------------|-------------------------------------------------------|
| <b>Perineal tears</b>       | <input type="checkbox"/> N/I-II d | <input type="checkbox"/> III d | <input type="checkbox"/> IV d       | <input type="checkbox"/> Missing                      |
| <b>PPH<sup>11</sup></b>     | <input type="checkbox"/> N        | <input type="checkbox"/> Minor | <input type="checkbox"/> Severe     | <input type="checkbox"/> Massive                      |
| <b>Blood transfusion</b>    | <input type="checkbox"/> N        | <input type="checkbox"/> Y     | <b>Units (#)</b>                    | _____                                                 |
| <b>Cord prolapse</b>        | <input type="checkbox"/> N        | <input type="checkbox"/> Y     | <b>Abruptio placentae</b>           | <input type="checkbox"/> N <input type="checkbox"/> Y |
| <b>Uterine rupture</b>      | <input type="checkbox"/> N        | <input type="checkbox"/> Y     | <b>Amn fluid embol</b>              | <input type="checkbox"/> N <input type="checkbox"/> Y |
| <b>Admission to ICU/HDO</b> | <input type="checkbox"/> N        | <input type="checkbox"/> Y     | <b>Major organ dys<sup>12</sup></b> | <input type="checkbox"/> N <input type="checkbox"/> Y |
| <b>OT after deliv</b>       | <input type="checkbox"/> N        | <input type="checkbox"/> Y     | <b>Hysterectomy</b>                 | <input type="checkbox"/> N <input type="checkbox"/> Y |
| <b>Sepsis/sev infect</b>    | <input type="checkbox"/> N        | <input type="checkbox"/> Y     | <b>DVT/PE</b>                       | <input type="checkbox"/> N <input type="checkbox"/> Y |
| <b>Other Complications</b>  | <input type="checkbox"/> N        | <input type="checkbox"/> Y     | <b>Other infections</b>             | <input type="checkbox"/> N <input type="checkbox"/> Y |

**Final outcome (one tick)**

Discharged  Disc with disab due to preg complic<sup>13</sup>  Death  Referred  LAMA  
**Near Miss<sup>14</sup>**  N  Y

**If NM or death, cause (select main; if more than one, write in Notes)**

1 Pre-exist cardiac dis  2 Other pre-existing medic con  3 Suicide  
 4 Hypertension  5 Preeclampsia/Eclampsia  6 PPH  
 7 Amniotic fluid embolism  8 Sepsis/infection  9 DVT/PE  
 10 Complic anaesthesia  11 Other  0 Missing

If Others specify \_\_\_\_\_

Notes \_\_\_\_\_

**Post delivery duration stay (days)<sup>15</sup>**

**If stay >24 h, reason**  maternal  newborn  both  hospital regulations  Missing

-----**NEWBORN (N1)**-----

**Born**  Alive<sup>1</sup>  Dead<sup>2</sup> **If stillbirth<sup>3</sup>**  noSB  Macerated  Fresh  Intrapartum  Missing

**Sex**  Female  Male  Missing **BW (gr)<sup>4</sup>**     **Apgar1/5 /10**   /   /

**Ventilated in delivery room<sup>5</sup>**  N  Y  Missing **Asphyxia<sup>6</sup>**  N  Y  Missing

**Postdelivery**  With mother  SCBU  NICU  Referred  Obitorio  Missing

**Reason for referral**  medical complication  surgical complication  No beds  Other  Missing

**If baby in NICU /SCBU, add here BHT code**

**COMPLICATIONS**

**RDS<sup>7</sup>**  N  Y **Jaundice with ET**  N  Y **Sepsis**  N  Y

**Other Infect (incl NEC)**  N  Y **Major birth trauma<sup>8</sup>**  N  Y **Major malformation<sup>9</sup>**  N  Y

**Neurol (seizure, IVH, HIE)**  N  Y **Phototherapy > 24 h**  N  Y **Other**  N  Y

**If other, add** \_\_\_\_\_

**Final**  Discharged  Disc with disabilities  Death  Referred  LAMA

-----**NEWBORN (N2 if twins)**-----

**Born**  Alive<sup>1</sup>  Dead<sup>2</sup> **If stillbirth<sup>3</sup>**  noSB  Macerated  Fresh  Intrapartum  Missing

**Sex**  Female  Male  Missing **BW (gr)<sup>4</sup>**     **Apgar1/5 /10**   /   /

**Ventilated in delivery room<sup>5</sup>**  N  Y  Missing **Asphyxia<sup>6</sup>**  N  Y  Missing

**Postdelivery**  With mother  SCBU  NICU  Referred  Obitorio  Missing

**Reason for referral**  medical complication  surgical complication  No beds  Other  Missing

**If baby in NICU /SCBU, add here BHT code**

**COMPLICATIONS**

**RDS<sup>7</sup>**  N  Y **Jaundice with ET**  N  Y **Sepsis**  N  Y

**Other Infect (incl NEC)**  N  Y **Major birth trauma<sup>8</sup>**  N  Y **Major malformation<sup>9</sup>**  N  Y

**Neurol (seizure, IVH, HIE)**  N  Y **Phototherapy > 24 h**  N  Y **Other**  N  Y

**If other, add** \_\_\_\_\_

**Final**  Discharged  Disc with disabilities  Death  Referred  LAMA

**\*DEFINITIONS (WOMAN)**

- <sup>1</sup> **Gravida /Para/ Born alive:** fill this excluding current pregnancy/delivery (example: 3 pregnancies, 2 children, 1 stillbirth will be gravida 3, para 2, born alive 1)
- <sup>2</sup> **Risk factors at time of delivery:** consider here the risk factors present at time of delivery and that can affect the delivery outcome. Examples:
- If the mother had severe anaemia but this was corrected before delivery, do not tick the severe anaemia box).
  - If the mother had hypertension, pre-eclampsia, eclampsia, or hypothyroidism during current pregnancy, still tick the box even if the situation is under control
  - If relevant cardiac problems present or even in the past, still tick the box.
- <sup>3</sup> **Hypertension:** this is defined with a BP > 140/90
- <sup>4</sup> **IUGR/SGA:** defined as weight < 10 centile of estimated weight-for-GA or < 10 centile for abdominal circumference (Bangladesh growth chart). IUGR/SGA is based on US estimate (if there was an indication for US, such as clinical signs suggesting IUGR, but US was not performed or uncertain, collect this information under "other or uncertain".
- <sup>5</sup> **Steroids:** Complete dose is Dexametason 8 mg /12 hrs for 3 doses –can you double if this is your national standard ? (last GL 6mg/ 12 h 48 h)
- <sup>6</sup> **Induction:** as labour onset should be selected even in the case of **failed IOL** and subsequent CS, not "prelabour caesarean section" (note that this is accordingly to Robson classification)
- <sup>7</sup> **Macrosomy at US:** defined as weight > 3500 grams or 90 Centile weight-for-GA
- <sup>8</sup> **If IOL, mode of induction:** record here only procedures for IOL, i.e. until 4 cm dilatation
- <sup>9</sup> **Analg:** record only drugs actually given (not just prescribed). Record paracetamol under "other"
- <sup>10</sup> **Distocya 2nd stage:** CS at full dilatation
- <sup>11</sup> **PPH Minor** (not severe not massive) Severe PPH ( $\geq 1000$  ml or any bleeding with hypotension or tachycardia or blood transfusion) Massive (lost of  $\geq 40\%$  of blood volume, blood volume= body weight(kg)/12)
- <sup>12</sup> **Major organ dysfunction:** as for Near miss definition -do not consider diabetes as major organ dysfunction (see following ANNEX 1)
- <sup>13</sup> **Disabilities from pregnancy complications:** include here stroke, anaemia, post partum depression or other psychiatric disorders and other disabilities (not include preexisting problems such as GDM, hypertension, or hysterectomy)
- <sup>14</sup> **Near Miss=** A maternal near-miss case is defined as "a woman who nearly died but survived a complication that occurred during pregnancy, childbirth or within 42 days of termination of pregnancy" (*WHO 2011*). This implies either severe disease (severe PPH, severe pre-eclampsia, Eclampsia, sepsis, uterine rupture, severe complications of abortion), or critical interventions (admission UTI, intervention radiology, lapartotomy, blood transfusion) or organ dysfunction (see ANNEX 1)
- <sup>15</sup> **Post delivery duration stay:** count this in days. If admitted on 2 April and out day 3 April count this as 1 day if it is less than 24 h. If more than 24h, count this as 2 days

**DEFINITIONS (NEWBORN)**

- <sup>1</sup> **Born alive=** fetus/baby of any GA and any birth weight showing any sign of vital activity (breath, cardiac, movements)
- <sup>2</sup> **Born dead=** when not born alive; it includes stillbirth
- <sup>3</sup> **Stillbirth =** macerated are fresh are based on clinical evaluation; intrapartum is a fetus where heart rate was perceived before delivery (and than lost after delivery)
- <sup>4</sup> **Birth weight=** avoid approximation (use weight in grams)
- <sup>5</sup> **Ventilated in delivery room=** not just stimulated, but ventilated (with bag or CPAP) for more than *10 seconds*
- <sup>6</sup> **Asphyxia=** no spontaneous start of breathing, ventilation for at least *30 sec* and/or thoracic compressions as in international guidelines or any drug
- <sup>7</sup> **RDS (Respiratory Distress Syndrome)=** tick this box for a baby with respiratory distress lasting more than 24 hours
- <sup>8</sup> **Major birth trauma=** include here brachial plexus injury/arm palsy, fractures at any site, sub-aponeurotic (subgaleal) hemorrhage. Do NOT include here cephaloematoma and caput succedaneum
- <sup>9</sup> **Major Malformation=** do not include here minor malformation such as skin tags and pits, syndactyly, polydactyly, additional finger, PDA even if persistent.
- <sup>10</sup> **Day of death=** for still birth use day zero

<sup>12</sup> **ANNEX 1 DEFINITIONS ORGAN DYSFUNCTION (SOURCE: WHO MANUAL)****Organ dysfunction / life-threatening conditions**

- C0 Cardiovascular dysfunction**  
[shock, use of continuous vasoactive drugs, cardiac arrest, cardio-pulmonary resuscitation, severe hypoperfusion (lactate  $>5$  mmol/L or  $>45$ mg/dL) or severe acidosis (pH $<7.1$ )]
- C1 Respiratory dysfunction**  
[acute cyanosis, gasping, severe tachypnea (respiratory rate $>40$  bpm), severe bradypnea (respiratory rate $<6$  bpm), severe hypoxemia (PAO<sub>2</sub>/FiO<sub>2</sub> $<200$  O<sub>2</sub> saturation  $<90\%$  for  $\geq 60$ min) or intubation and ventilation not related to anaesthesia]
- C2 Renal dysfunction**  
[oliguria non responsive to fluids or diuretics, dialysis for acute renal failure or severe acute azotemia (creatinine  $\geq 300$ umol/ml or  $\geq 3.5$ mg/dL)]
- C3 Coagulation/hematologic dysfunction**  
[failure to form clots, massive transfusion of blood or red cells ( $\geq 5$  units) or severe acute thrombocytopenia ( $<50,000$  platelets/ml)]
- C4 Hepatic dysfunction**  
[jaundice in the presence of pre-eclampsia, severe acute hyperbilirubinemia (bilirubin $>100$ umol/L or  $>6.0$ mg/dL)]
- C5 Neurologic dysfunction**  
[prolonged unconsciousness / coma (lasting  $>12$  hours), stroke, status epilepticus / uncontrollable fits, total paralysis]
- C6 Uterine dysfunction / Hysterectomy**  
[haemorrhage or infection leading to hysterectomy]



## Appendix 2. Missing variables

|                                               | Total | Missing | % Missing |
|-----------------------------------------------|-------|---------|-----------|
| <b>Maternal variables</b>                     |       |         |           |
| Age                                           | 7504  | 34      | 0.4       |
| Work                                          | 7504  | 38      | 0.5       |
| Education                                     | 7504  | 37      | 0.4       |
| Para (number of children)                     | 7504  | 34      | 0.4       |
| Marital status                                | 7504  | 38      | 0.5       |
| Gravidas (pregnancies, including the ongoing) | 7504  | 34      | 0.4       |
| Born alive                                    | 7504  | 34      | 0.4       |
| Gestational age at delivery                   | 7504  | 47      | 0.6       |
| Gestational age estimated with ultrasounds    | 7504  | 53      | 0.7       |
| BMI                                           | 7504  | 53      | 0.7       |
| Discharge                                     | 7504  | 35      | 0.4       |
| Delivery                                      | 7504  | 32      | 0.4       |
| Multiple pregnancies                          | 7504  | 34      | 0.4       |
| Pregestetional hypertension                   | 7504  | 33      | 0.4       |
| Gestetional hypertension (no proteinuria)     | 7504  | 35      | 0.4       |
| Pre-eclampsia not severe                      | 7504  | 35      | 0.4       |
| Pre-eclampsia severe                          | 7504  | 35      | 0.4       |
| Eclampsia                                     | 7504  | 34      | 0.4       |
| Chorionamnionitis                             | 7504  | 36      | 0.4       |
| Major fetal malformation                      | 7504  | 36      | 0.4       |
| IUGR/SGA                                      | 7504  | 36      | 0.4       |
| Pregestetional diabetes                       | 7504  | 35      | 0.4       |
| Gestetional diabetes mellitus in diet         | 7504  | 35      | 0.4       |
| Gestetional diabetes mellitus in drug therapy | 7504  | 36      | 0.4       |
| Maternal cardiac disease                      | 7504  | 34      | 0.4       |
| Maternal hypothyroidism                       | 7504  | 37      | 0.4       |
| Polihydramnios                                | 7504  | 36      | 0.4       |
| Oligohydramnios                               | 7504  | 38      | 0.4       |
| APH/major placenta previa                     | 7504  | 37      | 0.4       |
| Severe anaemia                                | 7504  | 38      | 0.5       |
| Other (risk factors)                          | 7504  | 63      | 0.8       |
| Steroids                                      | 7504  | 37      | 0.4       |

|    |                                   |      |    |     |
|----|-----------------------------------|------|----|-----|
| 1  | Previous CS                       | 7504 | 38 | 0.5 |
| 2  | If previous CS, trial of labour   | 7504 | 39 | 0.4 |
| 3  |                                   |      |    |     |
| 4  | Presentation                      | 7504 | 37 | 0.4 |
| 5  |                                   |      |    |     |
| 6  | Labour onset                      | 7504 | 36 | 0.4 |
| 7  |                                   |      |    |     |
| 8  | Delivery mode                     | 7504 | 37 | 0.4 |
| 9  |                                   |      |    |     |
| 10 | If CS, type                       | 7504 | 37 | 0.4 |
| 11 |                                   |      |    |     |
| 12 | Indication of labour              | 7504 | 36 | 0.4 |
| 13 |                                   |      |    |     |
| 14 | Mode of induction                 | 7504 | 42 | 0.5 |
| 15 |                                   |      |    |     |
| 16 | If operative delivery, indication | 7504 | 38 | 0.5 |
| 17 |                                   |      |    |     |
| 18 | Episiotomy                        | 7504 | 43 | 0.5 |
| 19 |                                   |      |    |     |
| 20 | Analgesia in labour               | 7504 | 43 | 0.5 |
| 21 |                                   |      |    |     |
| 22 | 3 <sup>rd</sup> stage management  | 7504 | 39 | 0.5 |
| 23 |                                   |      |    |     |
| 24 | Removal of placenta               | 7504 | 39 | 0.5 |
| 25 |                                   |      |    |     |
| 26 | Operator delivery                 | 7504 | 41 | 0.5 |
| 27 |                                   |      |    |     |
| 28 | Perineal tears                    | 7504 | 36 | 0.4 |
| 29 |                                   |      |    |     |
| 30 | PPH                               | 7504 | 38 | 0.5 |
| 31 |                                   |      |    |     |
| 32 | Blood transfusion                 | 7504 | 36 | 0.4 |
| 33 |                                   |      |    |     |
| 34 | Cord collapse                     | 7504 | 42 | 0.5 |
| 35 |                                   |      |    |     |
| 36 | Uterine rupture                   | 7504 | 42 | 0.5 |
| 37 |                                   |      |    |     |
| 38 | Admission to ICU                  | 7504 | 22 | 0.2 |
| 39 |                                   |      |    |     |
| 40 | OT after delivery                 | 7504 | 43 | 0.5 |
| 41 |                                   |      |    |     |
| 42 | Sepsis/several infections         | 7504 | 44 | 0.5 |
| 43 |                                   |      |    |     |
| 44 | Other complications               | 7504 | 45 | 0.6 |
| 45 |                                   |      |    |     |
| 46 | Abruption placentae               | 7504 | 42 | 0.5 |
| 47 |                                   |      |    |     |
| 48 | Amniotic fluid embolism           | 7504 | 42 | 0.5 |
| 49 |                                   |      |    |     |
| 50 | Major organ dysfunction           | 7504 | 37 | 0.4 |
| 51 |                                   |      |    |     |
| 52 | Hysterectomy                      | 7504 | 36 | 0.4 |
| 53 |                                   |      |    |     |
| 54 | DVT                               | 7504 | 46 | 0.6 |
| 55 |                                   |      |    |     |
| 56 | Final outcome                     | 7504 | 42 | 0.5 |
| 57 |                                   |      |    |     |
| 58 | Near miss                         | 7504 | 20 | 0.2 |
| 59 |                                   |      |    |     |
| 60 | <b>Newborn variables †</b>        |      |    |     |
|    | Born                              | 7504 | 43 | 0.5 |
|    | If stillbirth, fresh or macerated | 7504 | 75 | 1.0 |

|                                                |      |     |     |
|------------------------------------------------|------|-----|-----|
| Sex                                            | 7504 | 51  | 0.6 |
| Birth weight                                   | 7504 | 68  | 0.9 |
| Apgar at 1'                                    | 7504 | 168 | 2.2 |
| Apgar at 5'                                    | 7504 | 168 | 2.2 |
| Apgar at 10'                                   | 7504 | 166 | 2.2 |
| Ventilated in delivery room                    | 7504 | 119 | 1.5 |
| Asphyxia                                       | 7504 | 124 | 1.6 |
| Post-delivery                                  | 7504 | 44  | 0.5 |
| Respiratory distress syndrome                  | 7504 | 114 | 1.5 |
| Other infections                               | 7504 | 110 | 1.4 |
| Neurological complications (seizure, IVH, HIE) | 7504 | 114 | 1.5 |
| Jaundice with ET                               | 7504 | 112 | 1.4 |
| Major birth trauma                             | 7504 | 120 | 1.6 |
| Phototherapy for over 24 hours                 | 7504 | 121 | 1.6 |
| Sepsis                                         | 7504 | 113 | 1.5 |
| Major malformation                             | 7504 | 120 | 1.6 |
| Other complications                            | 7504 | 172 | 2.3 |
| Final                                          | 7504 | 108 | 1.4 |

Abbreviations: APH= ante-partum haemorrhage; BMI= body Mass index; CS= caesarian section; DVT= deep vein thrombosis; ET= exchange transfusion; HIE= Hypoxic Ischemic Encephalopathy; ICU= Intensive care unit; IUGR=Intra-uterine growth restriction; IVH= intra-ventricular haemorrhage; OT=operating theatre; PPH= post-partum haemorrhage; SGA= small for gestational age.

<sup>†</sup> For multiple pregnancies, only data on the first newborn provided

# BMJ Open

## Implementation of an individual-patient prospective database of hospital births in Sri Lanka and its use for improving quality of care

|                                 |                                                                                                                                                                                                                                                                                                                                                                                                                                                                                                                                                                                                                                                                                                                                                                                                                                                                                                                                                                                                                                                                                                                                                                                                                                                                                                                                                                                                                                                                                                                                                                                                                                                                                                                                                                                                                                                                                                     |
|---------------------------------|-----------------------------------------------------------------------------------------------------------------------------------------------------------------------------------------------------------------------------------------------------------------------------------------------------------------------------------------------------------------------------------------------------------------------------------------------------------------------------------------------------------------------------------------------------------------------------------------------------------------------------------------------------------------------------------------------------------------------------------------------------------------------------------------------------------------------------------------------------------------------------------------------------------------------------------------------------------------------------------------------------------------------------------------------------------------------------------------------------------------------------------------------------------------------------------------------------------------------------------------------------------------------------------------------------------------------------------------------------------------------------------------------------------------------------------------------------------------------------------------------------------------------------------------------------------------------------------------------------------------------------------------------------------------------------------------------------------------------------------------------------------------------------------------------------------------------------------------------------------------------------------------------------|
| Journal:                        | <i>BMJ Open</i>                                                                                                                                                                                                                                                                                                                                                                                                                                                                                                                                                                                                                                                                                                                                                                                                                                                                                                                                                                                                                                                                                                                                                                                                                                                                                                                                                                                                                                                                                                                                                                                                                                                                                                                                                                                                                                                                                     |
| Manuscript ID                   | bmjopen-2018-023706.R1                                                                                                                                                                                                                                                                                                                                                                                                                                                                                                                                                                                                                                                                                                                                                                                                                                                                                                                                                                                                                                                                                                                                                                                                                                                                                                                                                                                                                                                                                                                                                                                                                                                                                                                                                                                                                                                                              |
| Article Type:                   | Research                                                                                                                                                                                                                                                                                                                                                                                                                                                                                                                                                                                                                                                                                                                                                                                                                                                                                                                                                                                                                                                                                                                                                                                                                                                                                                                                                                                                                                                                                                                                                                                                                                                                                                                                                                                                                                                                                            |
| Date Submitted by the Author:   | 02-Aug-2018                                                                                                                                                                                                                                                                                                                                                                                                                                                                                                                                                                                                                                                                                                                                                                                                                                                                                                                                                                                                                                                                                                                                                                                                                                                                                                                                                                                                                                                                                                                                                                                                                                                                                                                                                                                                                                                                                         |
| Complete List of Authors:       | Lizzerini, Marzia; WHO Collaborating Centre Trieste, Institute for Maternal and Child Health IRCCS Burlo Garofolo<br>Senanayake, H.; Faculty of Medicine, Department of Obstetrics & Gynaecology, University of Colombo; University Obstetrics Unit, De Soysa Hospital for Women, Colombo, Sri Lanka<br>Mohamed , Rishard ; Faculty of Medicine, Department of Obstetrics & Gynaecology, University of Colombo; University Obstetrics Unit, De Soysa Hospital for Women, Colombo, Sri Lanka<br>Kaluarachchi, Athula; Faculty of Medicine, Department of Obstetrics & Gynaecology, University of Colombo; University Obstetrics Unit, De Soysa Hospital for Women, Colombo, Sri Lanka<br>Fernando , Roshini; Faculty of Medicine, Department of Obstetrics & Gynaecology, University of Colombo<br>Sakalasuriya , Anshumalie; Faculty of Medicine, Department of Obstetrics & Gynaecology, University of Colombo<br>Ihsan , Fathima Reshma; Faculty of Medicine, Department of Obstetrics & Gynaecology, University of Colombo<br>Saravanabhava , Namasivayam; District Hospital Thellipalai, Thellipalai, Sri Lanka<br>Gamaathige , Nalin; De Soysa Hospital for Women, Colombo, Sri Lanka, Neonatology Unit<br>Jayawardena , Madura ; Department of Obstetrics & Gynaecology, Faculty of Medical Sciences, University of Sri Jayawardenapura<br>Gamage, Ruwan Vidana; Base Hospital, Balangoda<br>Covi, Benedetta; WHO Collaborating Centre Trieste, Institute for Maternal and Child Health IRCCS Burlo Garofolo<br>Wanzira, Humphey; WHO Collaborating Centre Trieste, Institute for Maternal and Child Health IRCCS Burlo Garofolo<br>Businelli, Caterina; Institute for Maternal and Child Health IRCCS Burlo Garofolo, Department of Maternal and Newborn Health<br>Piccoli, Monica ; Institute for Maternal and Child Health IRCCS Burlo Garofolo, Department of Maternal and Newborn Health |
| <b>Primary Subject Heading</b>: | Health services research                                                                                                                                                                                                                                                                                                                                                                                                                                                                                                                                                                                                                                                                                                                                                                                                                                                                                                                                                                                                                                                                                                                                                                                                                                                                                                                                                                                                                                                                                                                                                                                                                                                                                                                                                                                                                                                                            |
| Secondary Subject Heading:      | Obstetrics and gynaecology, Global health, Health informatics                                                                                                                                                                                                                                                                                                                                                                                                                                                                                                                                                                                                                                                                                                                                                                                                                                                                                                                                                                                                                                                                                                                                                                                                                                                                                                                                                                                                                                                                                                                                                                                                                                                                                                                                                                                                                                       |
| Keywords:                       | Maternal medicine < OBSTETRICS, Quality in health care < HEALTH SERVICES ADMINISTRATION & MANAGEMENT, HEALTH SERVICES                                                                                                                                                                                                                                                                                                                                                                                                                                                                                                                                                                                                                                                                                                                                                                                                                                                                                                                                                                                                                                                                                                                                                                                                                                                                                                                                                                                                                                                                                                                                                                                                                                                                                                                                                                               |

1  
2  
3  
4  
5  
6  
7  
8  
9  
10  
11  
12  
13  
14  
15  
16  
17  
18  
19  
20  
21  
22  
23  
24  
25  
26  
27  
28  
29  
30  
31  
32  
33  
34  
35  
36  
37  
38  
39  
40  
41  
42  
43  
44  
45  
46  
47  
48  
49  
50  
51  
52  
53  
54  
55  
56  
57  
58  
59  
60

|  |                                                                                                             |
|--|-------------------------------------------------------------------------------------------------------------|
|  | ADMINISTRATION & MANAGEMENT, International health services <<br>HEALTH SERVICES ADMINISTRATION & MANAGEMENT |
|  |                                                                                                             |

SCHOLARONE™  
Manuscripts

# Implementation of an individual-patient prospective database of hospital births in Sri Lanka and its use for improving quality of care

**Short title: Individual patient maternal and newborn database to improve quality of care in Sri Lanka**

Marzia Lazzerini,<sup>1</sup> Hematha Senanayake,<sup>2,3</sup> Rishard Mohamed,<sup>2,3</sup> Athula Kaluarachchi,<sup>2,3</sup> Roshini Fernando,<sup>3</sup> Anshumalie Sakalasuriya,<sup>3</sup> Fathima Reshma Ihsan,<sup>3</sup> Namasivayam Saravanabhava,<sup>4</sup> Nalin Gamaathige,<sup>5</sup> Madura Jayawardena,<sup>6</sup> Ruwan Vidana Gamage,<sup>7</sup> Benedetta Covi,<sup>1</sup> Humphrey Wanzira,<sup>1</sup> Caterina Businelli,<sup>1</sup> Monica Piccoli.<sup>1</sup>

<sup>1</sup> Institute for Maternal and Child Health IRCCS Burlo Garofolo, Trieste, Italy.

<sup>2</sup> University Obstetrics Unit, De Soysa Hospital for Women, Colombo, Sri Lanka

<sup>3</sup> Faculty of Medicine, Department of Obstetrics & Gynaecology, University of Colombo, Colombo, Sri Lanka.

<sup>4</sup> District Hospital Thellippalai, Thellippalai, Sri Lanka.

<sup>5</sup> Neonatology Unit, De Soysa Hospital for Women, Colombo, Sri Lanka

<sup>6</sup> Department of Obstetrics & Gynaecology, Faculty of Medical Sciences, University of Sri Jayawardenapura, Nugegoda 10250, Sri Lanka

<sup>7</sup> Base Hospital, Balangoda, Sri Lanka

## Authors' e-mail contacts

ML: marzia.lazzerini@burlo.trieste.it

HS: senanayakeh@gmail.com

RM: mrishard@obg.cmb.ac.lk

AK: akaluarachchi@obg.cmb.ac.lk

RF: ragynobs2009@gmail.com

AS: sakalasaritha43@gmail.com

FRI: resh.ihsan798@gmail.com

NS: sarabhava@yahoo.com

NG: nalinnicu@gmail.com

MJ: madurammj@yahoo.com

RVG: ruwangamage21@yahoo.com

BC: benedetta.covi@burlo.trieste.it

HW: humphey.wanzira@burlo.trieste.it

CB: caterina.businelli@burlo.trieste.it

MP: monica.piccoli@burlo.trieste.it

1  
2  
3  
4  
5  
6  
7  
8  
9  
10  
11  
12  
13  
14  
15  
16  
17  
18  
19  
20  
21  
22  
23  
24  
25  
26  
27  
28  
29  
30  
31  
32  
33  
34  
35  
36  
37  
38  
39  
40  
41  
42  
43  
44  
45  
46  
47  
48  
49  
50  
51  
52  
53  
54  
55  
56  
57  
58  
59  
60

**Corresponding author**

Marzia Lazzerini DTMH, MSc, PhD  
WHO Collaborating Centre for Maternal and Child Health  
Institute for Maternal and Child Health IRCCS Burlo Garofolo  
Via dell'Istria 65/1, 34137, Trieste, ITALY  
Email: marzia.lazzerini@burlo.trieste.it

For peer review only

## ABSTRACT

**Objectives** This study aimed at piloting a prospective individual patient database on hospital deliveries in Colombo, Sri Lanka, and at exploring its use for developing recommendations for improving the quality of care (QoC).

**Design** Observational study.

**Setting** De Soysa Teaching Hospital for Women, the largest referral hospital for maternity care in Sri Lanka.

**Data collection and analysis** From July 2015 to June 2017 for each delivery 150 variables were collected in a standardised form and entered in a database. Data were analysed every eight months and results were made available to local staff. Outcomes of the study included: technical problems; data completeness; data accuracy; key database findings; use of data .

**Results** 7504 deliveries were recorded. No technical problem was reported. Data completeness exceeded that of other existing hospital recording systems. Missing data were less than 1% for maternal variables, and less than 3% for newborn variables. Mistakes in data collection and entry occurred in 0.01% and 0.09% of cases respectively. Key QoC indicators identified in comparison to international standards were: relatively low maternal mortality (0.053%); relatively high maternal near-miss cases (3.4%); high rate of induction of labour (24.6%), caesarean section (30.0%) and episiotomy (56.1%); relatively high rate of preterm babies (9.4%), low-birth-weight babies (16.5%), stillbirth (0.97%), and of total deaths in newborn (1.98%). Recommendations developed focused on the key indicators identified and included the use of checklist to standardise case management, training, clinical audits, and more information for patients. Based on this pilot experience, a list of lessons learned was drawn.

**Conclusions** The study shows that the implemented system of data collection can produce a large quantity of reliable information. Most importantly, this experience provides an example on how database findings can be used for discussing hospital practices, identifying gaps, and agree recommendations for improving the QoC.



## Article summary: strengths and limitations of this study

- The study reports on the first individual patient database for comprehensive prospective data collection on births in Sri Lanka. Very few individual patient databases exist in general in low and middle-income countries (LMIC).
- The study showed that implemented data collection system can produce a large quantity of reliable information that can be used for quality improvement purposes, thus providing a model that can be adopted by policy makers in other similar settings.
- Although the study was single-centre, it has the merit of reporting both technical feasibility related to the database implementation, quality of data (ie, data completeness and accuracy), lessons learned, and, actual use of data – the latter three being often neglected issues -.

### Keywords

Quality of care; Health Information system; mothers and newborns.

### Disclosure of interests

None competing interest

### List of abbreviations

LMIC = low and middle-income countries

MM= maternal mortality ratio

QoC= Quality of Care

WHO = World Health Organization

## BACKGROUND

The availability of an actionable health information system is one of the key components of the World Health Organisation (WHO) framework for improving the quality of maternal and newborn health care (1,2) and one of the recommended cross-cutting actions in the WHO Strategy for Ending Preventable Maternal Mortality (EPMM) (3). According to WHO standards (2), “the health information systems should enable using data to ensure timely actions to improve the care of every woman and newborn”. More specifically, a health facility should have mechanisms for data collection, analysis and feedback as part of the activities for monitoring and improving performance around the time of childbirth (2).

However, estimates have highlighted major gaps in data collection even on key indicators: only one third of countries have the capacity to count or register maternal deaths (3,4) and less than two fifths of all countries have a complete civil registration system with accurate attribution of the cause of death (3,5). Quality of data is also an area of significant concern: according to a WHO review, although most countries are using some core indicators to monitor performance in maternal and newborn care, virtually no low- or lower-middle-income country has a full system of data sharing and transparent quality control in place (6). The availability of accurate data is relatively limited even in high-income countries, where most often hospital administrative datasets lack key information - such as maternal risk factors - needed for evaluating the case mix and for interpreting the observed outcomes (7).

Sri Lanka is a lower middle-income country (8). Since the civil war ended in 2009, the economy has grown on average at 6.2% per year (8), in transition from being predominantly rural-based to one that is urban-oriented around manufacturing and services. Major progresses have been made in maternal healthcare in past decades: according to the last estimates the reported maternal mortality ratio (MMR) is relatively low (33.7/100.000) (9). However, no significant improvement in the MMR has been observed in the last 10 years (8-11). The latest national Maternal Mortality Review have shown that 50% of maternal deaths are from direct causes, with preventable causes, such as post-partum haemorrhage and sepsis, being among the top five causes of death (9). Almost 80% of all women died in hospitals (9), where specialized facilities are available, thus suggesting possible gaps in the quality of care provided (9). Inappropriate practices are suggested also by other indicators, such as the rising rate of caesarean section (CS) (12), peaking above 50% in selected facilities (12). The estimated rate of induction of labour in Sri Lanka is currently among the highest in Asia (35.5%) and the rate of inductions without medical indication is reported to be 27.8% (13).

1  
2  
3 Presently in Sri Lanka the health information system collects data only on selected maternal and  
4 newborn indicators, in an aggregate form. The objective of this study was to pilot, in the largest  
5 maternity unit in Sri Lanka, a system for collecting prospectively, for each case of delivery, a large  
6 number of maternal and newborn variables. The paper also aimed at reporting on the use of data  
7 for developing recommendations to improve the quality of hospital care, in a participatory manner.  
8  
9  
10

## 11 **METHODS**

### 12 **Population and setting**

13  
14  
15 The study was conducted at the De Soysa Hospital for Women in Colombo, the largest referral  
16 hospital for maternity care in Sri Lanka. Previous collaborations among the involved institutions  
17 provided the opportunity to establish an international working group dedicated to improve the  
18 quality of maternal hospital care. It was agreed that establishing a system of data collection and  
19 fostering data use were two necessary steps toward this direction. In June 2015, a database for  
20 routinely collecting individual patient data was implemented in wards 3 and 15, the two wards of  
21 the University Obstetrics Unit in the hospital, where about half of the total deliveries of the hospital  
22 take place. All deliveries occurring in these two wards, with no exclusions, were to be entered in  
23 the database. This paper reports findings of the first 24 months of data collection, from July 2015 to  
24 June 2017.  
25  
26  
27  
28  
29  
30  
31  
32

### 33 **Data collection tools**

34 For each delivery, data were collected in a standardised form (“Yellow Form”) and entered in a  
35 database. The “Yellow Form” was two pages long (**Appendix 1**), and recorded 150 variables for  
36 each delivery: demographic and socio-economic data of the woman (8 variables); characteristics of  
37 pregnancy and risk factors (28 variables); process of care during birth (60 variables); maternal  
38 health outcomes (31 variables); newborn health at birth and during hospitalisation, process of care  
39 and health outcomes (23 variables). The database was developed using Epidata (14), a free  
40 software that allows for inclusion of internal checks. Data were collected and entered in the  
41 database by dedicated trained data collectors.  
42  
43  
44  
45  
46  
47

### 48 **Data quality assurance procedures**

49 The Yellow Form was developed through a participatory approach with local staff. The team  
50 involved included: six senior obstetricians from De Soysa Hospital and other hospitals in Sri Lanka,  
51 eight midwifery-qualified nurses, two registrars in obstetrics and gynaecology, one neonatologist,  
52 one registrar in neonatology, two data collectors. Two external researchers (one obstetrician and  
53 one epidemiologist) participated as facilitators. Variables were selected based on the experience  
54 reported in the literature (1,2,6,7) and on previous experience of the team, so that it could allow  
55  
56  
57  
58  
59  
60

1  
2  
3 answering different research questions and monitoring trends over time. Case-definitions were  
4 derived from international literature (15-17). Instructions on how to fill the form, and specific case  
5 definitions were developed in parallel with the development of the form and embedded into it  
6 (Appendix 1).  
7  
8  
9

10 All relevant information were to be extracted from the medical files. The use of an intermediate  
11 paper based system of data collection was agreed at the beginning of the project based on the  
12 following consideration: using a paper-based form to collect data allows to check for internal  
13 consistency in the data collected, before entering them in the database.  
14  
15  
16  
17

18 Both the data collection form, the instructions on how to fill it, and how to transfer information in the  
19 database were field-tested. Procedures of data collection were field tested to evaluate the following  
20 domains: if the sequence of data in the form was appropriate; if case definitions were clear; if data  
21 collectors were able to fill the form and enter data in the database; if time needed to fill the form  
22 and enter data in the database was acceptable to allow routine data collection; if there were  
23 sources of systematic error or bias; if there was any technical problem. Data collectors were  
24 young medical doctors who were trained on the standard operating procedures (SOP) of data  
25 collection and data entry and supervised over time.  
26  
27  
28  
29  
30

31 The database was designed in a way that the interface for data entry was almost identical to the  
32 "Yellow Form". To further minimise data-entry errors, the database contained 137 internal  
33 automatic validation rules, aiming at minimising errors in biological plausibility of data (i.e. normal  
34 ranges), data completeness and internal consistency.  
35  
36  
37  
38

39 For the initial period of data collection for each case of delivery two data collectors independently  
40 filled a Yellow Form and data were cross-checked to evaluate consistency. This procedure was  
41 continued until when errors in data collection were consistently low (ie. below 0.02%; this was  
42 achieved in the time period of about 1 month). Subsequently, data completeness and accuracy in  
43 data collection and data entry were monitored by an external independent data monitor who  
44 randomly reviewed 5% of forms and 5% of the entered cases. Missing cases or errors in data  
45 collection/entry were corrected in real time. Data were also externally monitored for completeness  
46 and internal consistency at about four months intervals.  
47  
48  
49  
50  
51

### 52 **Data analysis and use**

54 Data were analysed at intervals of eight months using a standardized plan for analysis, pre-defined  
55 and agreed among partners. This included: a descriptive analysis of all the key variables in the  
56 database; an analysis of CS groups according to Robson Classification (16,17) and other minor  
57  
58  
59  
60

1  
2  
3 secondary analyses as suggested by the finding of the primary analysis and as requested by  
4 partners. Data were analysed by the external team (WHO Collaborating Centre) and made  
5 available as tables and graphs to the local staff (De Soysa hospital) in the format of a power point  
6 presentation. Data were provided with the purpose of being locally discussed in dedicated  
7 workshops, and used to develop recommendations to improve the quality of care at hospital level  
8  
9  
10

## 11 **Outcomes**

12 Outcomes of the study are reported in Box 1 and further described below. Technical problems in  
13 data collection were defined as any technical problem occurring with the use of the database  
14 (either with the software or with the computer). These had to be notified by data collectors in real  
15 time to the local coordinator and to the external team.  
16  
17  
18  
19  
20

21 Database completeness was checked by an independent assessor by comparing the number of  
22 cases entered in the database with data in the official hospital registers and specifically with the  
23 following eight data sources: i) birth register; ii) intensive care unit (ICU) admissions register; iii)  
24 operating theatre (OT) register; iv) neonatal intensive care unit (NICU) admissions register; v)  
25 Special Care Baby Unit (SCBU) admissions register; vi) maternal death reviews; vii) perinatal  
26 mortality and morbidity statistics; viii)) monthly reports.  
27  
28  
29  
30

31 The number of missing cases for each variable was calculated as the number of missing cases in  
32 the database out of the total expected entries for that variable.  
33  
34  
35

36 Accuracy in data collection was measured by the number of variables correctly recorded in the  
37 yellow form when compared to the original medical files. Accuracy in data entry was measured by  
38 the number of variables correctly recorded in the database compared to the yellow forms. Both  
39 accuracy in data collection and data entry were assessed by an external independent data  
40 collector who randomly checked 5% of forms and 5% of entered cases, respectively.  
41  
42  
43  
44

45 Database findings included a descriptive analysis of the key variables as agreed among partners.  
46 Data on multiple pregnancies were not included in this primary descriptive analysis of newborn  
47 outcomes. Use of data for quality improvement purposes included any action-oriented  
48 recommendation generated from review of the data outcomes by researchers and partners  
49  
50  
51  
52  
53

### 54 **Box 1. Outcomes of the study**

#### 55 **i) Technical problems:**

- 56 - any type of technical problem in implementing and using the database.

**ii) Data completeness:**

- number of cases entered in the database versus data in the official registers;
- number of missing cases for each variable in the database.

**iii) Data accuracy:**

- number of correct variables in the yellow form versus the original medical files;
- number of correct variables in the database compared to the yellow forms.

**iv) Database findings:**

- descriptive analysis of the key variables as agreed among partners.

**v) Use of data for quality improvement purposes:**

- any action-oriented recommendation generated from review of the data outcomes by researchers and partners.

**Ethical considerations**

The study was approved by the Ethics Review Committee of the Faculty of Medicine, University of Colombo. Confidentiality was maintained by de-identifying all files before database entry. Human subjects were not directly involved in the study. Informed consent was not requested by the Ethics Review Committee.

**Patient and Public Involvement**

Patient or public were not directly involved in the study. However, the selection of the variables to be included in the database was informed by patient experience, as reported in literature (16) The development of recommendations for improving the quality of care took into account the importance of effective communication with patients.

**RESULTS****Technical problems**

No technical problems occurred. The data collectors reported that there were no technical difficulties in managing the database.

**Data completeness**

**Table 1** reports the number of total cases in the database when compared to other official hospital data sources. Numbers were matching, except for the cases of hysterectomies, for which the database appear to contain one additional case (verified as actually being a real case).

**Table 1. Number of cases in the database compared to hospital registers and other official sources of data**

|                                        | Database | Hospital registers | Source of data for comparison                                                           |
|----------------------------------------|----------|--------------------|-----------------------------------------------------------------------------------------|
| <b>Maternal indicators</b>             |          |                    |                                                                                         |
| Total deliveries                       | 7504     | 7504               | Birth register                                                                          |
| Maternal deaths                        | 4        | 4                  | Maternal deaths reviews                                                                 |
| Admission to ICU                       | 239      | 239                | ICU register                                                                            |
| PPH                                    | 147      | 147                | Birth register                                                                          |
| OT after delivery                      | 11       | 11                 | OT register                                                                             |
| Hysterectomy                           | 22       | 21                 | OT register                                                                             |
| <b>Newborn indicators <sup>1</sup></b> |          |                    |                                                                                         |
| Stillbirth                             | 82       | 82                 | Birth register, monthly reports                                                         |
| Admission to NICU                      | 105      | 105                | NICU register                                                                           |
| Admission to SCBU                      | 1121     | 1121               | SCBU register                                                                           |
| Neonatal deaths after birth            | 81       | 81                 | Birth register + NICU and SCBU registers + perinatal mortality and morbidity statistics |

Notes: <sup>1</sup> Including also the second twin in multiple pregnancies.

Abbreviation: ICU= Intensive care unit; NICU= Neonatal intensive care unit; OT= operating theatre; PPH= post-partum haemorrhage; SCBU= semi-intensive baby unit

Number of missing variables is reported in **Appendix 2**. Missing data were less than 1% for all maternal variables, and less than 2% in all but two newborn variables.

### Data accuracy

Random checks by an independent data monitor on 5% of Yellow Forms and 5% of entered cases revealed that mistakes in data collection in the forms occurred in 0.01% of cases, while mistakes in data entry in the database occurred in 0.09% of cases.

### Database findings

**Tables 2,3 and 4** report the descriptive analysis of key indicators in the database. Overall, during the two years of the study period, 7504 deliveries were entered (Table 2). In terms of socio-demographic characteristics, most women belonged to the following categories: 4253 (56.7%) were 25 to 34 years old; 6028 (80.3%) had secondary education; 6253 (83.3%) were housewives;

5231 (69.7%) had a normal nutritional status. Overall, in 4182 (55.7%) of deliveries there was a maternal or foetal medical condition or a risk factor for operative delivery/ negative outcome, the most prevalent being: gestational diabetes (13.4%), pre or post-term delivery (12.9%), and previous CS (12.7%). Overall 2870 (38.2%) were primigravidae.

Analysing the population according to Robson classification, the most prevalent groups were: group 3 (multiparous, single cephalic, at term in spontaneous labour), accounting for 27.1% of total case; group 1 (nulliparous, single cephalic, at term, in spontaneous labour) accounting for 23.2% of cases; group 2a (nulliparous, single cephalic, at term, induced), 12.8% of cases; group 5 (previous CS, single cephalic at term), 10.9% of the population.

**Table 2. Maternal characteristics**

|                                           | n<br>(N=7504) | %     |
|-------------------------------------------|---------------|-------|
| <b>Age categories</b>                     |               |       |
| < 18 years                                | 95            | 1.2   |
| 18-24 years                               | 1862          | 24.8  |
| 25-34 years                               | 4253          | 56.6  |
| 35-39 years                               | 1036          | 13.8  |
| >40 years                                 | 224           | 2.9   |
| Missing                                   |               |       |
| <b>Number of pregnancies <sup>1</sup></b> |               |       |
| 1                                         | 2870          | 38.24 |
| 2                                         | 2313          | 30.82 |
| ≥3                                        | 2285          | 30.47 |
| Missing                                   | 34            | 0.45  |
| <b>Education</b>                          |               |       |
| None                                      | 23            | 0.31  |
| Primary                                   | 235           | 3.13  |
| Secondary                                 | 6028          | 80.33 |
| Higher                                    | 1181          | 15.74 |
| Missing                                   | 37            | 0.49  |
| <b>Work</b>                               |               |       |
| Not reported by the mother                | 77            | 1.03  |
| Working                                   | 1136          | 15.14 |
| Housewife                                 | 6253          | 83.33 |
| Missing                                   | 38            | 0.51  |
| <b>Marital status</b>                     |               |       |
| Married                                   | 7350          | 97.95 |
| Unmarried                                 | 96            | 1.28  |
| Living together                           |               |       |



|                                                                   |      |       |
|-------------------------------------------------------------------|------|-------|
| Missing                                                           | 20   | 0.27  |
|                                                                   | 38   | 0.51  |
| <b><i>Nutritional status</i></b> <sup>2</sup>                     |      |       |
| Underweight                                                       | 670  | 8.93  |
| Normal                                                            | 5231 | 69.71 |
| Overweight                                                        | 1110 | 14.79 |
| Obese                                                             | 440  | 5.86  |
| Missing                                                           | 53   | 0.71  |
| <b><i>Medical conditions /risk factors (any)</i></b> <sup>3</sup> | 4182 | 55.73 |
| <b><i>Gestational diabetes, total</i></b>                         | 1002 | 13.36 |
| On diet                                                           | 417  | 5.56  |
| On drug therapy                                                   | 585  | 7.80  |
| Gestational age <37 >= 41                                         | 966  | 12.87 |
| Previous CS                                                       | 956  | 12.74 |
| <b><i>Hypertensive disorders of pregnancy, any</i></b>            | 506  | 6.74  |
| Pre-gestational hypertension                                      | 168  | 2.24  |
| Gestational hypertension                                          | 179  | 2.39  |
| Pre-eclampsia not severe                                          | 78   | 1.04  |
| Pre-eclampsia severe                                              | 69   | 0.92  |
| Eclampsia                                                         | 12   | 0.16  |
| IUGR at ultrasound                                                | 504  | 6.72  |
| Obesity                                                           | 440  | 5.86  |
| Breech/transverse/oblique lie                                     | 339  | 4.52  |
| Pre-gestational diabetes                                          | 266  | 3.54  |
| Maternal cardiac disease                                          | 234  | 3.12  |
| Fetal conditions, other                                           | 223  | 3.10  |
| Maternal hypothyroidism                                           | 219  | 2.92  |
| Maternal age >40                                                  | 224  | 2.9   |
| Oligohydramnios                                                   | 131  | 1.75  |
| APH                                                               | 112  | 1.49  |
| Polyhydramnios                                                    | 96   | 1.28  |
| Multiple pregnancies                                              | 84   | 1.12  |
| Severe anaemia                                                    | 40   | 0.53  |
| Chorioamnionitis                                                  | 11   | 0.15  |

Notes: <sup>1</sup> Including the ongoing pregnancy. <sup>2</sup> As defined by National Guidelines in Sri Lanka. <sup>3</sup> Any of the medical conditions/risk factors described in the following rows.

Abbreviations: APH= ante-partum haemorrhage; CS= caesarian section; IUGR= intra-uterine growth retardation.

In terms of process indicators and maternal outcomes (**Table 3**), 1849 (24.6%) of women had their labour induced, and 2251 (30.0%) had a CS. Rate of vaginal birth after CS (VBAC) was 17.1%. Episiotomy was performed in 4213 (56.1%) of women. In terms of health outcomes, there were four cases of maternal death (0.053%). Overall 254 (3.38%) of cases were identified as maternal near miss. Post-partum haemorrhage (any severity) occurred in 147 (1.9%) women, with 39 (0.52%) women having a severe or massive haemorrhage. Overall there were 22 (0.29%) cases of hysterectomy. During the whole study period there were no cases of uterine rupture.

**Table 3. Birth process indicators and maternal outcomes**

|                                     | n<br>(N=7504) | %     |
|-------------------------------------|---------------|-------|
| <b><i>Labour onset</i></b>          |               |       |
| Spontaneous                         | 4726          | 62.98 |
| Induction                           | 1849          | 24.64 |
| Pre-labour CS                       | 893           | 11.90 |
| Missing                             | 36            | 0.48  |
| <b><i>Mode of delivery</i></b>      |               |       |
| Vaginal spontaneous                 | 4906          | 65.38 |
| Vaginal operative                   | 310           | 4.13  |
| Caesarean section                   | 2251          | 30.00 |
| Missing                             | 37            | 0.49  |
| <b><i>Caesarean section</i></b>     |               |       |
| In spontaneous labour onset         | 927           | 19.61 |
| In induction of labour              | 441           | 28.85 |
| <b><i>Episiotomy</i></b>            |               |       |
|                                     | 4213          | 56.14 |
| <b><i>Key maternal outcomes</i></b> |               |       |
| Maternal deaths                     | 4             | 0.05  |
| Admission to ICU                    | 239           | 3.18  |
| Near-miss cases <sup>2</sup>        | 254           | 3.38  |
| PPH                                 | 147           | 1.96  |
| OT after delivery                   | 11            | 0.15  |
| Hysterectomy                        | 22            | 0.29  |
| Uterine Rupture                     | 0             | 0     |
| Sepsis                              | 29            | 0.39  |
| DVT/PE                              | 2             | 0.03  |
| Abruptio placentae                  | 21            | 0.38  |
| Amniotic fluid embolisms            | 0             | 0     |
| Perineal tears III-IV degree        | 17            | 0.23  |

Notes: <sup>1</sup> As for Robson's classification (17); <sup>2</sup> As for WHO classification (15)

Abbreviations: CS= caesarian section; DVT= Deep vein thrombosis; ICU= Intensive care unit; NICU= Neonatal intensive care unit; OT= operating theatre; PE= pulmonary embolism; PPH= post-partum haemorrhage.

The analysis of the newborns' characteristics and outcomes (**Table 4**) pointed out the following key indicators: 73 (0.97%) were stillborn; 708 (9.4%) were born pre-term (ie, before 37 weeks of gestational age); 1243 (16.6%) had a low birth-weight (ie, below 2500 grams), ; 173 (2.3%) were ventilated for more than 10 seconds in the delivery room. Overall 917 (12.2%) newborns had at least one complication during their hospital stay, and among these the most frequent was the respiratory distress syndrome (3.7%). Overall, 101 (1.62) newborns had major malformations. Overall 148 (1.98%) were either born dead or died during the hospitalisation; among these cases (death either before or after birth), 55.1% had major malformations.

**Table 4. Newborns' characteristics and outcomes**

| NEWBORN                                              | n<br>(N=7504) <sup>1</sup> | %     |
|------------------------------------------------------|----------------------------|-------|
| <b>Sex</b>                                           |                            |       |
| Female                                               | 3644                       | 48.56 |
| Male                                                 | 3792                       | 50.83 |
| Missing                                              | 68                         | 0.91  |
| <b><i>Gestational age (weeks + days)</i></b>         |                            |       |
| < 33 + 6                                             | 223                        | 2.96  |
| 34 to 36+ 6                                          | 485                        | 6.19  |
| 37 to 40+ 6                                          | 6491                       | 86.50 |
| > 41                                                 | 258                        | 3.43  |
| Missing                                              | 47                         | 0.62  |
| <b><i>Weight at birth</i></b>                        |                            |       |
| <1499                                                | 149                        | 1.99  |
| 1500 to 1999                                         | 183                        | 2.44  |
| 2000 to 2499                                         | 911                        | 12.14 |
| 2500 to 3499                                         | 5365                       | 71.50 |
| 3500 to 4000                                         | 724                        | 9.65  |
| >4000                                                | 104                        | 1.39  |
| Missing                                              | 68                         | 0.91  |
| <b>Stillbirth, total</b>                             | 73                         | 0.97  |
| Macerated                                            | 42                         | 0.56  |
| Fresh                                                | 27                         | 0.36  |
| Missing                                              | 4                          |       |
| Ventilated in delivery room for more than 10 seconds | 173                        | 2.34  |
| Asphyxia                                             | 62                         | 0.84  |

|                                              |      |       |
|----------------------------------------------|------|-------|
| <b>Post-delivery</b>                         |      |       |
| With mother                                  | 6164 | 82.14 |
| SCBU                                         | 1105 | 14.73 |
| NICU                                         | 96   | 1.28  |
| Referred                                     | 9    | 0.12  |
| Death                                        | 75   | 1     |
| Missing                                      | 11   | 0.07  |
| <b><i>Neonates with any complication</i></b> | 917  | 12.22 |
| <b><i>Complications</i></b>                  |      |       |
| RDS                                          | 276  | 3.73  |
| Infection, other than sepsis                 | 121  | 1.35  |
| Major malformation                           | 101  | 1.62  |
| Neurological <sup>2</sup>                    | 38   | 0.50  |
| Sepsis                                       | 28   | 0.38  |
| Major Birth Trauma                           | 16   | 0.21  |
| Severe jaundice with ET                      | 15   | 0.20  |
| Others <sup>3</sup>                          | 232  | 3.09  |
| <b>Final outcome</b>                         |      |       |
| Discharged                                   | 7204 | 96.00 |
| Discharged with disabilities                 | 4    | 0.05  |
| Death (including stillbirths)                | 148  | 1.98  |
| Referred                                     | 54   | 0.72  |
| LAMA                                         | 15   | 0.20  |

Notes: <sup>1</sup> Data on multiple pregnancies were not included in this primary analysis. <sup>2</sup> Seizures, ventricular haemorrhage and other neurological complications. <sup>3</sup> Most frequent reported conditions in this class were other respiratory problems (eg, apnoea, meconium aspiration syndrome, pulmonary hypertension), gastrointestinal problems (eg, bleeding), minor jaundice.

Abbreviations: ET= exchange transfusion; LAMA= Left against medical advice; NICU=neonatal intensive care unit; RDS= respiratory distress syndrome; SCBU=semi-intensive care baby unit.

### **Use of data**

Data entered in the database were timely analysed at intervals of eight months and made available to the local coordinator. Findings of the database were presented and discussed in two large workshops with staff from De Soysa Hospital and from other large maternity units in Sri Lanka. Participants to these meetings included: senior obstetricians, neonatologists, postgraduate trainees and other middle level medical personnel, nurses, midwives and other staff. About 50 people participated to each workshop.

During these meetings, key indicators suggesting possible gaps in quality of care were identified, and recommendations for improvement were discussed and agreed upon (**Table 5**). Indicators identified as requiring actions to improve quality of care were: high rate of induction of labour (24.6%), of CS (30.0%) and episiotomy (56.1%); relatively high maternal near-miss cases (3.4%); relatively high rate of preterm babies (9.4%), low-birth-weight babies (16.5%), stillbirth (0.97%), and of total deaths in newborns (1.98%). Recommendations developed focused on the key indicators identified and included the use of checklists to standardise case management, training, clinical audits, and more information for patients.

Smaller meetings of technical working groups were also organised, in order to develop and agree specific tools and procedures to put in practice the recommendations agreed (such as: developing the information pamphlet on VBAC, and the checklists to review obstetric emergencies).

**Table 5. Use of data for improving quality of care**

| Key Indicators identified                                                                                                                                                                                                                                                                                                                                                                                                                                                                                                            | Agreed recommendations for quality improvement                                                                                                                                                                                                                                                                                                                                                                                                                                                                                                                                                                                                                                                                                                                                                                                                                                                                                                                                                                                                                                                                                                                                                                                                                                                                                 |
|--------------------------------------------------------------------------------------------------------------------------------------------------------------------------------------------------------------------------------------------------------------------------------------------------------------------------------------------------------------------------------------------------------------------------------------------------------------------------------------------------------------------------------------|--------------------------------------------------------------------------------------------------------------------------------------------------------------------------------------------------------------------------------------------------------------------------------------------------------------------------------------------------------------------------------------------------------------------------------------------------------------------------------------------------------------------------------------------------------------------------------------------------------------------------------------------------------------------------------------------------------------------------------------------------------------------------------------------------------------------------------------------------------------------------------------------------------------------------------------------------------------------------------------------------------------------------------------------------------------------------------------------------------------------------------------------------------------------------------------------------------------------------------------------------------------------------------------------------------------------------------|
| <p><b>Maternal</b></p> <ul style="list-style-type: none"> <li>- High rate of induction of labour (24.6%), with many woman in Robson group 2a (nulliparous, single cephalic, at term, induced)</li> <li>- High rate of CS (30.0%), relatively high prevalence of group 5 (multiparous with previous CS)</li> <li>- Low rate of VBAC (17.1%)</li> <li>- High rate of episiotomy (56.1%)</li> <li>- Relatively high rate of near-miss cases</li> <li>- Low reported rate 3<sup>rd</sup>-4<sup>th</sup> degree perineal tears</li> </ul> | <ul style="list-style-type: none"> <li>• Checklist to be filled by the doctor in charge for each individual case of induction of labour, specifying indications, methods, timing. Data to be reviewed regularly. Consultant to make decision on IOL</li> <li>• Dedicated workshops on CS, discussing local data and international recommendations (16,17).</li> <li>• Training workshops to help improve the CTG interpretation skills. Stickers to help CTG interpretation. Improved communication regarding CTG interpretation from midwives to medical officers using "WhatsApp/Viber".</li> <li>• Training workshop to develop a consensus on how to manage foetal distress and poor progress of labour.</li> <li>• Establishment of a nurse-lead VBAC counselling clinic and development of a VBAC leaflet for patients. Education for staff, including community midwives, on methods of counselling.</li> <li>• Implementation of a selective episiotomy policy; training of midwives and medical staff on appropriate indication for episiotomy.</li> <li>• Doctors to identify clearly near-miss cases. Establishment of a system for regular internal review of near-miss cases.</li> <li>• Development of checklists for systematic analysis of obstetric emergencies against international standards of</li> </ul> |

|                                                                                                                                                                                                                                                                                                                        |                                                                                                                                                                                                                                                                                                                                                                                    |
|------------------------------------------------------------------------------------------------------------------------------------------------------------------------------------------------------------------------------------------------------------------------------------------------------------------------|------------------------------------------------------------------------------------------------------------------------------------------------------------------------------------------------------------------------------------------------------------------------------------------------------------------------------------------------------------------------------------|
|                                                                                                                                                                                                                                                                                                                        | <p>care.</p> <ul style="list-style-type: none"> <li>• Training of midwives on checking and reporting the perineum status after delivery.</li> </ul>                                                                                                                                                                                                                                |
| <p><b>Newborn</b></p> <ul style="list-style-type: none"> <li>- High rate of preterm (9.4%)</li> <li>- High rate of low birth weight (16.5%)</li> <li>- High rate of stillbirth (0.97%)</li> <li>- High rate of newborns with complications (12.2%)</li> <li>- High rate of total deaths in newborns (1.98%)</li> </ul> | <ul style="list-style-type: none"> <li>• Improve diffusion of national and international guidelines of antenatal care..</li> <li>• Improve prenatal ultrasound diagnosis of SGA and of malformation.</li> <li>• Development of checklist for systematic analysis of newborn care against international standards of care.</li> <li>• Training on newborn resuscitation.</li> </ul> |

Abbreviations: CTG: cardiotocography; SGA: small for gestational age; VBAC: vaginal birth after cesarean section.

### Lessons learned

Results of this study were discussed among partners and lessons learned and future actions were articulated (**Box 2**). Overall the key lesson was that data collection was feasible, it resulted in a large amount of data with an acceptable quality, and in the development of some recommendations for quality improvement; however, use of data could be further improved. Drawing on this experience and on other experiences reported in literature (7,18-23), some concrete actions that may further help improving use of data in the future were discussed (**Box 2**). Although a simplified version of the Yellow Form was discussed, it was difficult to identify what variables to exclude: despite the data collection form including 150 variables, when findings were discussed clinicians tended to request even more additional information.

### Box 2. Lessons learned and way forward

#### *Key lessons*

1. Data collection was feasible and resulted in a large amount of data with an acceptable quality and in the development of some recommendations for quality Improvement (QI); however, use of data could be further improved.
2. Standard Operating procedures (SOP) and regular data monitoring and evaluation (M&E) was crucial.
3. One data collector was sufficient to collect data in the study setting, but one additional person was needed to ensure regular M&E.
4. Ensuring concrete use of data for QI should not be taken for granted and it requires building a system of coordination to facilitate data diffusion and discussion.
5. In general, clinicians showed low interest in statistical data compared to clinical subjects. Clinicians without training or without a particular interest in QI methods, were poorly interested in using statistical

1  
2  
3 data for QI purposes, and were more attracted by new technologies. Appropriate involvement of staff  
4 (e.g. training, participation to projects, assignment of specific responsibilities), is needed to develop a  
5 local team who will act as drivers in QI.  
6

- 7 6. It is difficult to find the golden balance between a “simple” data collection form (i.e. collecting few  
8 variables) and an “informative” data collection form that satisfies clinicians (i.e. collecting a large  
9 number of variables).  
10

### 11 **Way forward**

- 12 1. The “Yellow Form” could be incorporated into the patient file; data collection could be made part of the  
13 duties of the hospital staff in charge of each single case. This should facilitate sustainability and may  
14 further improve quality of data.  
15  
16 2. All staff involved in data collections should be made aware of the standard case definitions.  
17  
18 3. Regular local M&E should be ensured to avoid drops in data quality.  
19  
20 4. Adding in the database functions of automatic reporting may probably increase local ownership and  
21 facilitate use of data.  
22  
23 5. Other forms of diffusing data, rather than workshops, may be explored, such as use of posters or  
24 newsletters.  
25  
26 6. With the number of recommendations increasing, the establishment of a technical group for QI within  
27 the hospital, with clear roles and responsibilities becomes mandatory to ensure their implementation.  
28  
29 7. To ensure translation into actions of recommendations arising from data discussion, a system for  
30 regular follow up should be put in place. This will probably be more effective if embedded in a national  
31 system for quality assurance in maternal and child health.  
32

33 Abbreviations: M&E= monitoring and evaluation; QI= quality improvement; SOP= standard operating  
34 procedures.  
35

## 36 **DISCUSSION**

37  
38 This is the first individual patient database established for comprehensive prospective data  
39 collection on births in Sri Lanka. From a review of existing literature, we could identify very few  
40 databases prospectively collecting a large number of individual patient variables on hospital births.  
41 Of these, most data collection systems were established in high-income countries, or in upper  
42 middle-income countries such as Brazil, Peru and South Africa (19-21). We were able to identify  
43 only two systems for prospective collection of individual maternal and newborn variables across  
44 the time of birth in low or lower middle-income countries (22,23) and both collected data from a  
45 single facility (22-24). In respect to the average hospital administrative data, even in high income  
46 countries, the dataset implemented in this pilot study contains a large number of variables, such as  
47 maternal risk factors, that can be used for evaluating the case mix and for adjusting for  
48 confounders (7,21).  
49  
50  
51  
52  
53  
54  
55  
56  
57  
58  
59  
60

1  
2  
3 Most importantly, routine use of data to improve case management and organization of care is still  
4 not a common practice, even in countries with well-established data collection systems (7). Despite  
5 there being some good examples of how routine data collection systems are used to shape  
6 policies in low and middle-income countries (LMIC), for example in the paediatric field (24), these  
7 are very limited in number. As such, the main value of this study is that it provides an example of  
8 how data can be used for discussing and agreeing on recommendations for improving the quality  
9 of care.  
10  
11  
12  
13  
14

15 This study was aimed at reporting the feasibility of implementing an accurate system of data  
16 collection and not at an extensive presentation of the database findings. Additional analyses (such  
17 as a detailed analysis of practices and outcomes related to CS according to the Robson Groups  
18 (25), and other multivariate and sub-group analyses) will be the object of future publications. Many  
19 of the findings of the descriptive analysis reported in this paper - such as the rate of maternal  
20 deaths, induction of labour and low birth weight babies - are not overall surprising and rather in line  
21 with other country reports (5,8-13,24,27-31). Results reflect the specificity of the setting: De Soysa  
22 Hospital is the largest referral maternity hospital in Sri Lanka, and case mix, as well as local  
23 practices, do not necessarily represent the average in the country. For example, the rate of  
24 induction of labour, CS and near-miss cases, although being relatively high when compared to  
25 other reports in international literature, actually are below the national reported average  
26 (12,13,27,30). Rate of stillbirth and newborn deaths after birth may appear high when compared to  
27 national statistics (the most recent national report provides a figure of stillbirth rate of 5.9/1000  
28 (32)). This may be due to the case mix, with 55.7% of pregnancies at the De Soysa Hospital  
29 presenting at least one medical condition/risk factor for operative delivery/negative outcome.  
30 Additionally, about half of cases of stillbirth had a major malformation. Of notice, medical  
31 termination of pregnancy in Sri Lanka is allowed only to save the life of the mother, but not for any  
32 condition of foetal impairment, not even major malformations (33). The rate of post-partum  
33 haemorrhage, appeared to be lower than what would be expected for LMIC according to  
34 international literature (34), but it was double checked in the hospital registers and found to be  
35 correct (Table 1). The low prevalence of DVT and PE may be due to the fact that these events are  
36 less frequent in the Asian population compared to others, or to under-reporting (35,36). It must be  
37 acknowledged that for most of the variables collected - such as risk factors, episiotomy, reasons  
38 for induction of labour/operative deliveries, newborn complications, etc, there is no other system of  
39 official data in the whole country. The main merit of the database was that it provided to hospital  
40 staff, for the first time in Sri Lanka, a large number of objective indicators on local practices and  
41 outcomes, thus providing the evidence base for discussing the appropriateness of the care  
42 delivered at the facility level. Although recommendations developed may not cover all actions  
43 needed to improve quality of care, they were agreed locally, and as such they represent an  
44  
45  
46  
47  
48  
49  
50  
51  
52  
53  
54  
55  
56  
57  
58  
59  
60



1  
2  
3 important step forward in the local culture of quality improvement and in the local ownership of the  
4 whole quality improvement process.  
5

6  
7 In the future, the database will be used to analyse more specific topics, such as the  
8 appropriateness of hospital practises related to CS or to induction of labour (these analyses are  
9 already ongoing, and will be reported in future publications. Findings of such analyses may inform  
10 the development of additional and mores specific recommendations to improve quality of care.  
11 Additionally, the database may provide a way of monitoring trends over time regarding patients'  
12 characteristics, hospital practices (ie, CS rates, and indications to CS) and health outcomes.  
13  
14  
15  
16

17  
18 Given the paucity of efficient data collection systems in LMIC (6,7), lessons from this study may be  
19 of interest to other researchers and policy makers. However, in generalising the findings of this  
20 study to other settings, key characteristics of this project must be acknowledged. First, in this study  
21 dedicated staff was appointed for data collection and entry. Second, supervision was provided, and  
22 data collection was monitored regularly. Data collection that proved accurate under these  
23 conditions may fail to have good results if these minimum conditions are not guaranteed, especially  
24 if monitoring is not ensured.  
25  
26  
27  
28  
29

30 The experience accumulated so far in this pilot experience at De Soysa Hospital may help scaling  
31 up the data collection system in other maternity units in the country. The Sustainable Development  
32 Goals (SDG) in countries with low baseline maternal mortality, such as Sri Lanka, include  
33 "achieving access to quality essential health-care services" (37). Target-setting is accompanied by  
34 the need for improving measurement approaches and data quality to allow more accurate tracking  
35 of country progress as well as causes of death (38). The implementation of a system for individual  
36 patient data collection on hospital deliveries in other maternity units in Sri Lanka will allow  
37 comparison of several variables (patient characteristics, process outcomes and health outcomes)  
38 among different geographical regions, settings, over time. Data generated could be used to  
39 improve overall national practices. The data collection form utilised in this project was designed  
40 together with professionals from different maternity units in Sri Lanka, therefore, when adapting it  
41 to other facilities, only minor adaptations may be required. However, scaling up will require a good  
42 mechanism for coordination, beside further testing to identify the optimal methods for data  
43 collection in other settings (such as smaller maternity units). Furthermore, it will be crucial to  
44 establish functional mechanisms (such as regular data audits) to ensure that information generated  
45 from the database are actually used in practice to improve quality of health care. As for many other  
46 types of data collection, the main problem may be that data are not actually utilised (7).  
47  
48  
49  
50  
51  
52  
53  
54  
55  
56  
57  
58  
59  
60

1  
2  
3 Limitations of this study include that, within the project timelines, it was not possible to follow up the  
4 impact of the recommendations developed. Future longer-term studies will be needed to assess  
5 changes in key indicators over time. Although the study was single-centre, it has the merit of  
6 reporting both technical feasibility related to the database implementation, quality of data  
7 (completeness and accuracy), lessons learned, and, actual use of data – the latter three being  
8 often neglected issues-.

## 13 CONCLUSIONS

16 This pilot study on the implementation of an individual patient database on hospital deliveries in Sri  
17 Lanka proved that in this setting a large quantity of data could be collected in an accurate way. The  
18 study is an example on how data can be used to discuss hospital practices, identify gaps in quality  
19 of care, and agree recommendations for improving the quality of hospital case management. More  
20 implementation research is needed to identify the best model for scaling up data collection to other  
21 maternities in Sri Lanka and in other low-middle income countries. More research in general  
22 should report on the actual use of data, and should aim at identifying effective ways of translating  
23 into practice recommendations generated from data.

## 30 Acknowledgments

31 We would like to thank all the hospitals staff who participated in the study. Our special thanks go to  
32 H K Dharmasiri, Medical Records Officer, De Soysa Hospital without whose steadfast support this  
33 project would not have been possible.

## 37 Funding

38 This study was funded by a grant from the GREAT Network, Canadian Institutes of Health  
39 Research, St. Michael's Hospital, Toronto.

## 43 Data sharing statement

44 All key data are provided in the paper. Additional details can be provided by the contact author on  
45 request.

## 49 Author contributions

50 ML, HS and MP conceived the study and procured funds

51 ML, HS, RM, NS,NG,MJ, RVG, and MP developed the data collections tools

52 AK, RF, AS and FRI collected data

53 BC, HW, CB and ML analysed the data

54 All authors interpreted data and contributed to the manuscript

1  
2  
3  
4  
5  
6  
7  
8  
9  
10  
11  
12  
13  
14  
15  
16  
17  
18  
19  
20  
21  
22  
23  
24  
25  
26  
27  
28  
29  
30  
31  
32  
33  
34  
35  
36  
37  
38  
39  
40  
41  
42  
43  
44  
45  
46  
47  
48  
49  
50  
51  
52  
53  
54  
55  
56  
57  
58  
59  
60

ML wrote the first draft of the paper, all authors contributed to the final version of the paper

For peer review only

## REFERENCES

1. Tunçalp O, Were WM, MacLennan C, Oladapo OT, Gülmezoglu AM, Bahl R, Daelmans B, Mathai M, Say L, Kristensen F, Temmerman M, Bustreo F. Quality of care for pregnant women and newborns-the WHO vision. *BJOG*. 2015 Jul;122(8):1045-9.
2. World Health Organization. Standards for improving quality of maternal and newborn care in health facilities. Geneva: World Health Organization, 2016. Available at [http://www.who.int/maternal\\_child\\_adolescent/documents/improving-maternal-newborn-care-quality/en/](http://www.who.int/maternal_child_adolescent/documents/improving-maternal-newborn-care-quality/en/) (accessed March 13, 2018)
3. World Health Organization Strategies toward ending preventable maternal mortality (EPMM). Geneva: World Health Organization, 2015 Available at [http://who.int/reproductivehealth/topics/maternal\\_perinatal/epmm/en/](http://who.int/reproductivehealth/topics/maternal_perinatal/epmm/en/) (accessed March 13, 2018)
4. Graham WJ, Ahmed S, Stanton C, Abou-Zahr CL, Campbell OMR. Measuring maternal mortality: an overview of opportunities and options for developing countries. *BMC Medicine* 2008;6:12
5. Trends in maternal mortality 1990–2013. Geneva: World Health Organization; 2014 Available at [http://apps.who.int/iris/bitstream/10665/112682/2/9789241507226\\_eng.pdf?ua=1](http://apps.who.int/iris/bitstream/10665/112682/2/9789241507226_eng.pdf?ua=1), (accessed March 13, 2018)
6. Country health information systems: a review of the current situation and trends. Geneva: World Health Organization; 2011
7. Geary RS, Knight HE, Carroll FE, Gurol-Urganci I, Morris E, Cromwell DA, van der Meulen JH. A step-wise approach to developing indicators to compare the performance of maternity units using hospital administrative data. *BJOG*. 2017 Nov 6. doi: 10.1111/1471-0528.15013.
8. The World Bank. Sri Lanka overview. Available at <http://www.worldbank.org/en/country/srilanka/overview> (accessed March 23, 2018)
9. Analyses of Maternal deaths 2015. Family Health Bureau Ministry of Health and Indigenous Medicine, Sri Lanka, Colombo 2014. Available at [http://fhb.health.gov.lk/web/index.php?option=com\\_phocadownload&view=category&id=40:maternal-child-morbidity-mortality-surveillance&Itemid=150&lang=en#](http://fhb.health.gov.lk/web/index.php?option=com_phocadownload&view=category&id=40:maternal-child-morbidity-mortality-surveillance&Itemid=150&lang=en#) (accessed March 25, 2018)

10. Unicef Sri Lanka Statistics. Available at [https://www.unicef.org/infobycountry/sri\\_lanka\\_statistics.html#122](https://www.unicef.org/infobycountry/sri_lanka_statistics.html#122) (accessed March 23, 2018)
11. Kapila Jayaratne. Maternal Death Surveillance and Response (MDSR) – outcomes of 2014. Available at [http://fhb.health.gov.lk/web/index.php?option=com\\_phocadownload&view=category&id=40:maternal-child-morbidity-mortality-surveillance&Itemid=150&lang=en#](http://fhb.health.gov.lk/web/index.php?option=com_phocadownload&view=category&id=40:maternal-child-morbidity-mortality-surveillance&Itemid=150&lang=en#) (accessed March 25, 2018)
12. Goonewardene M, Kumara DMA, Jathun Arachchi DR, Vithanage R, Wijeweera R. The rising trend in caesarean section rates: should we and can we reduce it? Sri Lanka Journal of Obstetrics and Gynaecology 2012; 34: 11-18
13. Vogel JP, Souza JP, Gülmezoglu AM. Patterns and Outcomes of Induction of Labour in Africa and Asia: a secondary analysis of the WHO Global Survey on Maternal and Neonatal Health. PLoS One. 2013 Jun 3;8(6):e65612. doi: 10.1371/journal.pone.0065612.
14. Epidata software. Available at <http://www.epidata.dk/> (accessed March 13, 2017)
15. World Health Organization 2011. Evaluating the quality of care for severe pregnancy complications: the WHO near-miss approach for maternal health. Geneva: World Health Organization, 2011.
16. Mahmud A, Morris E, Johnson S, Ismail KM. Developing core patient-reported outcomes in maternity: PRO-Maternity. BJOG. 2014 Sep;121 Suppl 4:15-9
17. Robson M, Hartigan L, Murphy M. Methods of achieving and maintaining an appropriate caesarean section rate. Best Pract Res Clin Obstet Gynaecol. 2013 Apr;27(2):297-308.
18. Robson M, Murphy M, Byrne F. Quality assurance: The 10-Group Classification System (Robson classification), induction of labor, and cesarean delivery. Int J Gynaecol Obstet. 2015 Oct;131 Suppl 1:S23-7.
19. Allanson ER, Muller M, Pattinson RC. Causes of perinatal mortality and associated maternal complications in a South African province: challenges in predicting poor outcomes. BMC Pregnancy Childbirth. 2015 Feb 15;15:37. doi:10.1186/s12884-015-0472-9.
20. Jorge MH, Gotlieb SL, Soboll ML, de Almeida MF, Latorre Mdo R. [An information system on live births and the use of its data in epidemiology and health statistics]. Rev Saude Publica. 1993 Dec;27 Suppl:1-44.

- 1  
2  
3 21. Statnikov Y, Ibrahim B, Modi N. A systematic review of administrative and clinical  
4 databases of infants admitted to neonatal units. *Arch Dis Child Fetal Neonatal Ed.*  
5 2017 May;102(3):F270-F276
- 6  
7 22. Seale AC, Barsosio HC, Koech AC, Berkley JA; KIPMAT group. Embedding  
8 surveillance into clinical care to detect serious adverse events in pregnancy.  
9 *Vaccine.* 2015 Nov 25;33(47):6466-8.
- 10  
11 23. Bergsjø P, Mlay J, Lie RT, Lie-Nielsen E, Shao JF. A medical birth registry at  
12 Kilimanjaro Christian Medical Centre. *East Afr J Public Health.* 2007 Apr;4(1):1-4.
- 13  
14 24. Sørbye IK, Vangen S, Oneko O, Sundby J, Bergsjø P. Caesarean section among  
15 referred and self-referred birthing women: a cohort study from a tertiary hospital,  
16 northeastern Tanzania. *BMC Pregnancy Childbirth.* 2011 Jul 28;11:55.
- 17  
18 25. PNG National Department of Health and Paediatric Society of PNG. Papua New  
19 Guinea Child Health Policy and Plan 2009 - 2020 (Updated 2015). Port Moresby,  
20 Papua New Guinea. 2015
- 21  
22 26. World Health Organization. Robson Classification: Implementation Manual. World  
23 Health Organization, Geneva 2017
- 24  
25 27. Senanayake H, Dias T, Jayawardena A. Maternal mortality and morbidity:  
26 epidemiology of intensive care admissions in pregnancy. *Best Pract Res Clin*  
27 *Obstet Gynaecol.* 2013 Dec;27(6):811-20.
- 28  
29 28. Jayaratne,K.; Agampodi,S.; Jayathilake,A.; Prerera,D. Moving beyond maternal  
30 deaths: Maternal near-miss es in Sri Lanka. *BJOG: Conference: RCOG World*  
31 *Congress 2015.* Brisbane, QLD Australia. Conference Start: 20150412. Conference  
32 End: 20150415. Conference Publication: (var.pagings). 122
- 33  
34 29. Tunçalp O, Hindin MJ, Souza JP, Chou D, Say L. The prevalence of maternal near-  
35 miss : a systematic review. *BJOG.* 2012 May;119(6):653-61. doi:10.1111/j.1471-  
36 0528.2012.03294.x. Review. PubMed PMID: 22489760.
- 37  
38 30. Lawn JE, Blencowe H, Waiswa P, Amouzou A, Mathers C, Hogan D, Flenady V,  
39 Frøen JF, Qureshi ZU, Calderwood C, Shiekh S, Jassir FB, You D, McClure EM,  
40 Mathai M,Cousens S; Lancet Ending Preventable Stillbirths Series study group;  
41 Lancet Stillbirth Epidemiology investigator group. Stillbirths: rates, risk factors, and  
42 acceleration towards 2030. *Lancet.* 2016 Feb 6;387(10018):587-603.
- 43  
44 31. Vogel JP, Betrán AP, Vindevoghel N, Souza JP, Torloni MR, Zhang J, Tunçalp Ö,  
45 Mori R, Morisaki N, Ortiz-Panoso E, Hernandez B, Pérez-Cuevas R, Qureshi Z,  
46 Gülmezoglu AM, Temmerman M; WHO Multi-Country Survey on Maternal and  
47 Newborn, Health Research Network. Use of the Robson classification to assess
- 48  
49  
50  
51  
52  
53  
54  
55  
56  
57  
58  
59  
60

- 1  
2  
3 caesarean section trends in 21 countries: a secondary analysis of two WHO  
4 multicountry surveys. *Lancet Glob Health*. 2015 May;3(5):e260-70.  
5  
6 32. Maternal & Child Morbidity, Mortality Surveillance. Family Health Bureau Ministry of  
7 Health and Indigenous Medicine, Sri Lanka, Colombo 2014. Available at  
8 [http://fhb.health.gov.lk/web/index.php?option=com\\_phocadownload&view=category](http://fhb.health.gov.lk/web/index.php?option=com_phocadownload&view=category&id=40:maternal-child-morbidity-mortality-surveillance&Itemid=150&lang=en#)  
9 [&id=40:maternal-child-morbidity-mortality-surveillance&Itemid=150&lang=en#](http://fhb.health.gov.lk/web/index.php?option=com_phocadownload&view=category&id=40:maternal-child-morbidity-mortality-surveillance&Itemid=150&lang=en#)  
10 (accessed March 25, 2018)  
11  
12 33. United Nations. Abortion policy, a global review. Available at  
13 <http://www.un.org/esa/population/publications/abortion/profiles.htm> (accessed  
14 March 25, 2018)  
15  
16 34. World Health Organization. WHO recommendations for the prevention and  
17 treatment of postpartum haemorrhage. World Health Organization, Geneva 2012.  
18 Available at  
19 [http://apps.who.int/iris/bitstream/handle/10665/75411/9789241548502\\_eng.pdf?seq](http://apps.who.int/iris/bitstream/handle/10665/75411/9789241548502_eng.pdf?sequence=1)  
20 [uence=1](http://apps.who.int/iris/bitstream/handle/10665/75411/9789241548502_eng.pdf?sequence=1) (accessed on April 10, 2018)  
21  
22 35. Sheriffdeen AH, Wijeyaratne M. Deep vein thrombosis in Sri Lankans--time to  
23 take notice. *Ceylon Med J*. 2001 Mar;46(1):3-5  
24  
25 36. Al-Ani F, Teng Y, Iansavichene A, Lazo-Langner A. Evaluating the Effect of  
26 Ethnicity on the Risk of Venous Thromboembolism (VTE): A Systematic Review.  
27 *Blood* 2015 126:4714.  
28  
29 37. Senanayake H, Goonewardene M, Ranatunga A, Hattotuwa R, Amarasekera S,  
30 Amarasinghe I. Achieving Millennium Development Goals 4 and 5 in Sri Lanka.  
31 *BJOG* 2011;118 (Suppl. 2):78–87  
32  
33 38. United Nations. General assembly. Transforming our world: the 2030 Agenda for  
34 Sustainable Development General Assembly, 25 Se September 2015. Available at  
35 [http://www.un.org/ga/search/view\\_doc.asp?symbol=A/RES/70/1&Lang=E](http://www.un.org/ga/search/view_doc.asp?symbol=A/RES/70/1&Lang=E)  
36 (accessed March 13, 2017)  
37  
38  
39  
40  
41  
42  
43  
44  
45  
46  
47  
48  
49  
50  
51  
52  
53  
54  
55  
56  
57  
58  
59  
60

1 Supplementary files

2  
3  
4 **Implementation of an individual-patient prospective**  
5  
6  
7 **database of hospital births in Sri Lanka and its use for**  
8  
9  
10 **improving quality of care**  
11  
12  
13  
14  
15

16 List of files

|    |                               |        |
|----|-------------------------------|--------|
| 17 |                               |        |
| 18 |                               |        |
| 19 | Appendix 1. Yellow Form       | Page 2 |
| 20 |                               |        |
| 21 | Appendix 2. Missing variables | Page 5 |
| 22 |                               |        |
| 23 |                               |        |
| 24 |                               |        |
| 25 |                               |        |
| 26 |                               |        |
| 27 |                               |        |
| 28 |                               |        |
| 29 |                               |        |
| 30 |                               |        |
| 31 |                               |        |
| 32 |                               |        |
| 33 |                               |        |
| 34 |                               |        |
| 35 |                               |        |
| 36 |                               |        |
| 37 |                               |        |
| 38 |                               |        |
| 39 |                               |        |
| 40 |                               |        |
| 41 |                               |        |
| 42 |                               |        |
| 43 |                               |        |
| 44 |                               |        |
| 45 |                               |        |
| 46 |                               |        |
| 47 |                               |        |
| 48 |                               |        |
| 49 |                               |        |
| 50 |                               |        |
| 51 |                               |        |
| 52 |                               |        |
| 53 |                               |        |
| 54 |                               |        |
| 55 |                               |        |
| 56 |                               |        |
| 57 |                               |        |
| 58 |                               |        |
| 59 |                               |        |
| 60 |                               |        |



## Appendix 1. YELLOW FORM

1 Complete this chart AT DELIVERY (white part) and AT DISCHARGE (dotted part)  Soya  Other  
 2 If other hosp, add name: \_\_\_\_\_  
 3  
 4 Adm (dd/mm/yy)  Deliv  Disch  BHT 15-   
 5 Age (years)  Education  No schooling  Primary (Grades 1-6)  Secondary (Grades 6-10)  Higher  
 6 Working status  No data  Working  Housewife Marital status  Married  Unmarried  Unmarried living together  
 7  
 8 GA at delivery (wks/days)  GA estimated with US  N  Y  Missing  
 9  
 10 Gravida (pregnancies)<sup>1</sup>  Para<sup>1</sup>  Born alive<sup>1</sup>  (<sup>1</sup> For para / born alive – exclude current pregnancy)  
 11 BMI at booking  Underweight (< 18.4)  Normal (18.5 - 22.9)  Overweight (23 - 27.4)  Obese (> 27.5)  
 12 (Risk factors at time of delivery-check all)<sup>2</sup>  
 13 Multiple pregn  N  Y PreGes Hyperten<sup>3</sup>  N  Y Ges Hyperten<sup>3</sup> no proteinur  N  Y  
 14 Pre-ecl NOT SEV  N  Y Pre-ecl SEV  N  Y Eclampsia  N  Y  
 15 Chorioamnionitis  N  Y Major fetal malformation/s  N  Y IUGR/SGA<sup>4</sup>  N  Y  
 16 Pregeste Diab  N  Y GDM in diet  N  Y GDM, in drug therapy  N  Y  
 17 Maternal-cardiac disease<sup>2</sup>  N  Y Maternal hypothyroidism  N  Y Polihydramnios  N  Y  
 18 Oligodramnion  N  Y APH/major plac previa/accret  N  Y Severe Anaemia (Hb<7)  N  Y  
 19 Other  N  Y  
 20  
 21 If Other maternal conditions, specify \_\_\_\_\_  
 22 If Other fetal conditions, specify \_\_\_\_\_  
 23 If Other, specify \_\_\_\_\_  
 24  
 25 **One tick only**  
 26 Steroids<sup>5</sup>  N  complete  incomplete  dose unclear  
 27 Previous CS  N  Y  Missing Number \_\_\_\_\_  
 28 If prev CS, trial of labour  No previous CS  N  Y  
 29 Presentation  Cephalic  Breech  Other  Missing  
 30 Labour onset  Spont  Induc (even if failed)  PreLabCS<sup>6</sup>  Missing  
 31  
 32 Delivery mode  Vag spont  Vag forcep/ventuse  CS  Missing  
 33 If CS, type  No CS  Emerg  Elect  Missing  
 34  
 35 **If IOL, main indication given (one tick only)**  
 36  1 No IOL  2 Post-term  3 Prelab rupture memb  4 Diabetes on diet  
 37  5 Diabet on insulin/metform  6 Macrosomy at US<sup>7</sup>  7 IUGR/SGA<sup>4</sup>  8 Multiple pregnancies  
 38  9 Maternal Age > 40 y  10 Hypert/Precl/Eclam  11 Cardiac disease  12 Oligoidramn  
 39  13 Other add \_\_\_\_\_  14 Prolonged latent phase/ painful contractions not in labour  0 Missing  
 40  
 41 **If IOL, mode of induction (one tick only)<sup>8</sup>**  
 42  1 No IOL  2 PGE  3 Oxytocin  4 Foley  
 43  5 ARM  6 PGE+ oxytocin ± ARM  7 Foley+ARM/oxytocin  8 Foley + PGE  
 44  9 ARM + oxytocin  10 Other add: \_\_\_\_\_  0 Missing  
 45  
 46 **If operative delivery, main indication (one tick only)**  
 47  1 No operative del  2 CTG anom/suspected fetal distress  3 Failed induction  
 48  4 Distocya 1st  5 Distocya 2nd stage<sup>10</sup>  6 Past CS  
 49  7 Breech/abnormal lie  8 History of subfertility  9 APH/major placenta previa  
 50  10 Cardiac disease  11 Prelab diagn CPD/short mother  12 Multiple pregnancies  
 51  13 IUGR  14 Pre term  15 Diab  
 52  16 Hypert/Precl/Eclam  17 Maternal request  18 Other  
 53  0 Missing  
 54 If other fetal cause specify \_\_\_\_\_  
 55 If other maternal specify \_\_\_\_\_  
 56 If other cause \_\_\_\_\_  
 57  
 58 **Episiotomy**  N  Y  Missing  
 59 **Analges in labour<sup>9</sup>**  N  Petidine  Epid  Spin  Mix  Other  
 60 **If CS, anaesthesia**  No CS  Spinal/epid  General  
 61 **3<sup>rd</sup> Stage manag**  Active  No active  Missing  
 62 **Removal placenta**  Spont  Manual  ERPC  Missing  
 63 **Operator del**  Nurse  MW  HO  SHO  Reg  Con  Missing

PTO

**Complications (one tick)**

|                             |                                   |                                |                                     |                                                       |
|-----------------------------|-----------------------------------|--------------------------------|-------------------------------------|-------------------------------------------------------|
| <b>Perineal tears</b>       | <input type="checkbox"/> N/I-II d | <input type="checkbox"/> III d | <input type="checkbox"/> IV d       | <input type="checkbox"/> Missing                      |
| <b>PPH<sup>11</sup></b>     | <input type="checkbox"/> N        | <input type="checkbox"/> Minor | <input type="checkbox"/> Severe     | <input type="checkbox"/> Massive                      |
| <b>Blood transfusion</b>    | <input type="checkbox"/> N        | <input type="checkbox"/> Y     | <b>Units (#)</b>                    | _____                                                 |
| <b>Cord prolapse</b>        | <input type="checkbox"/> N        | <input type="checkbox"/> Y     | <b>Abruptio placentae</b>           | <input type="checkbox"/> N <input type="checkbox"/> Y |
| <b>Uterine rupture</b>      | <input type="checkbox"/> N        | <input type="checkbox"/> Y     | <b>Amn fluid embol</b>              | <input type="checkbox"/> N <input type="checkbox"/> Y |
| <b>Admission to ICU/HDO</b> | <input type="checkbox"/> N        | <input type="checkbox"/> Y     | <b>Major organ dys<sup>12</sup></b> | <input type="checkbox"/> N <input type="checkbox"/> Y |
| <b>OT after deliv</b>       | <input type="checkbox"/> N        | <input type="checkbox"/> Y     | <b>Hysterectomy</b>                 | <input type="checkbox"/> N <input type="checkbox"/> Y |
| <b>Sepsis/sev infect</b>    | <input type="checkbox"/> N        | <input type="checkbox"/> Y     | <b>DVT/PE</b>                       | <input type="checkbox"/> N <input type="checkbox"/> Y |
| <b>Other Complications</b>  | <input type="checkbox"/> N        | <input type="checkbox"/> Y     | <b>Other infections</b>             | <input type="checkbox"/> N <input type="checkbox"/> Y |

**Final outcome (one tick)**

Discharged  Disc with disab due to preg comp<sup>13</sup>  Death  Referred  LAMA  
**Near Miss<sup>14</sup>**  N  Y

**If NM or death, cause (select main; if more than one, write in Notes)**

- |                                                    |                                                         |                                    |
|----------------------------------------------------|---------------------------------------------------------|------------------------------------|
| <input type="checkbox"/> 1 Pre-exist cardiac dis   | <input type="checkbox"/> 2 Other pre-existing medic con | <input type="checkbox"/> 3 Suicide |
| <input type="checkbox"/> 4 Hypertension            | <input type="checkbox"/> 5 Preeclampsia/Eclampsia       | <input type="checkbox"/> 6 PPH     |
| <input type="checkbox"/> 7 Amniotic fluid embolism | <input type="checkbox"/> 8 Sepsis/infection             | <input type="checkbox"/> 9 DVT/PE  |
| <input type="checkbox"/> 10 Complic anaesthesia    | <input type="checkbox"/> 11 Other                       | <input type="checkbox"/> 0 Missing |

If Others specify \_\_\_\_\_  
 Notes \_\_\_\_\_

**Post delivery duration stay (days)<sup>15</sup>**

If stay >24 h, reason  maternal  newborn  both  hospital regulations  Missing

-----NEWBORN (N1)-----

**Born**  Alive<sup>1</sup>  Dead<sup>2</sup> **If stillbirth<sup>3</sup>**  noSB  Macerated  Fresh  Intrapartum  Missing  
**Sex**  Female  Male  Missing **BW (gr)<sup>4</sup>**  **Apgar1/5 /10** //  
**Ventilated in delivery room<sup>5</sup>**  N  Y  Missing **Asphyxia<sup>6</sup>**  N  Y  Missing

**Postdelivery**  With mother  SCBU  NICU  Referred  Obitorio  Missing  
**Reason for referral**  medical complication  surgical complication  No beds  Other  Missing

If baby in NICU /SCBU, add here BHT code

**COMPLICATIONS**

**RDS<sup>7</sup>**  N  Y **Jaundice with ET**  N  Y **Sepsis**  N  Y  
**Other Infect (incl NEC)**  N  Y **Major birth trauma<sup>8</sup>**  N  Y **Major malformation<sup>9</sup>**  N  Y  
**Neurol (seizure,IVH,HIE)**  N  Y **Phototherapy > 24 h**  N  Y **Other**  N  Y  
 If other, add \_\_\_\_\_

**Final**  Discharged  Disc with disabilities  Death  Referred  LAMA

-----NEWBORN (N2 if twins)-----

**Born**  Alive<sup>1</sup>  Dead<sup>2</sup> **If stillbirth<sup>3</sup>**  noSB  Macerated  Fresh  Intrapartum  Missing  
**Sex**  Female  Male  Missing **BW (gr)<sup>4</sup>**  **Apgar1/5 /10** //  
**Ventilated in delivery room<sup>5</sup>**  N  Y  Missing **Asphyxia<sup>6</sup>**  N  Y  Missing

**Postdelivery**  With mother  SCBU  NICU  Referred  Obitorio  Missing  
**Reason for referral**  medical complication  surgical complication  No beds  Other  Missing

If baby in NICU /SCBU, add here BHT code

**COMPLICATIONS**

**RDS<sup>7</sup>**  N  Y **Jaundice with ET**  N  Y **Sepsis**  N  Y  
**Other Infect (incl NEC)**  N  Y **Major birth trauma<sup>8</sup>**  N  Y **Major malformation<sup>9</sup>**  N  Y  
**Neurol (seizure,IVH,HIE)**  N  Y **Phototherapy > 24 h**  N  Y **Other**  N  Y  
 If other, add \_\_\_\_\_

**Final**  Discharged  Disc with disabilities  Death  Referred  LAMA

**\*DEFINITIONS (WOMAN)**

- <sup>1</sup> **Gravida /Para/ Born alive:** fill this excluding current pregnancy/delivery (example: 3 pregnancies, 2 children, 1 stillbirth will be gravida 3, para 2, born alive 1)
- <sup>2</sup> **Risk factors at time of delivery:** consider here the risk factors present at time of delivery and that can affect the delivery outcome. Examples:
- If the mother had severe anaemia but this was corrected before delivery, do not tick the severe anaemia box).
  - If the mother had hypertension, pre-eclampsia, eclampsia, or hypothyroidism during current pregnancy, still tick the box even if the situation is under control
  - If relevant cardiac problems present or even in the past, still tick the box.
- <sup>3</sup> **Hypertension:** this is defined with a BP > 140/90
- <sup>4</sup> **IUGR/SGA:** defined as weight < 10 centile of estimated weight-for-GA or < 10 centile for abdominal circumference (Bangladesh growth chart). IUGR/SGA is based on US estimate (if there was an indication for US, such as clinical signs suggesting IUGR, but US was not performed or uncertain, collect this information under "other or uncertain".
- <sup>5</sup> **Steroids:** Complete dose is Dexametason 8 mg /12 hrs for 3 doses –can you double if this is your national standard ? (last GL 6mg/ 12 h 48 h)
- <sup>6</sup> **Induction:** as labour onset should be selected even in the case of **failed IOL** and subsequent CS, not "prelabour caesarean section" (note that this is accordingly to Robson classification)
- <sup>7</sup> **Macrosomy at US:** defined as weight > 3500 grams or 90 Centile weight-for-GA
- <sup>8</sup> **If IOL, mode of induction:** record here only procedures for IOL, i.e. until 4 cm dilatation
- <sup>9</sup> **Analg:** record only drugs actually given (not just prescribed). Record paracetamol under "other"
- <sup>10</sup> **Distocya 2nd stage:** CS at full dilatation
- <sup>11</sup> **PPH Minor** (not severe not massive) Severe PPH ( $\geq 1000$  ml or any bleeding with hypotension or tachycardia or blood transfusion) Massive (lost of  $\geq 40\%$  of blood volume, blood volume= body weight(kg)/12)
- <sup>12</sup> **Major organ dysfunction:** as for Near miss definition -do not consider diabetes as major organ dysfunction (see following ANNEX 1)
- <sup>13</sup> **Disabilities from pregnancy complications:** include here stroke, anaemia, post partum depression or other psychiatric disorders and other disabilities (not include preexisting problems such as GDM, hypertension, or hysterectomy)
- <sup>14</sup> **Near Miss=** A maternal near-miss case is defined as "a woman who nearly died but survived a complication that occurred during pregnancy, childbirth or within 42 days of termination of pregnancy" (*WHO 2011*). This implies either severe disease (severe PPH, severe pre-eclampsia, Eclampsia, sepsis, uterine rupture, severe complications of abortion), or critical interventions (admission UTI, intervention radiology, lapartotomy, blood transfusion) or organ dysfunction (see ANNEX 1)
- <sup>15</sup> **Post delivery duration stay:** count this in days. If admitted on 2 April and out day 3 April count this as 1 day if it is less than 24 h. If more than 24h, count this as 2 days

**DEFINITIONS (NEWBORN)**

- <sup>1</sup> **Born alive=** fetus/baby of any GA and any birth weight showing any sign of vital activity (breath, cardiac, movements)
- <sup>2</sup> **Born dead=** when not born alive; it includes stillbirth
- <sup>3</sup> **Stillbirth =** macerated are fresh are based on clinical evaluation; intrapartum is a fetus where heart rate was perceived before delivery (and than lost after delivery)
- <sup>4</sup> **Birth weight=** avoid approximation (use weight in grams)
- <sup>5</sup> **Ventilated in delivery room=** not just stimulated, but ventilated (with bag or CPAP) for more than *10 seconds*
- <sup>6</sup> **Asphyxia=** no spontaneous start of breathing, ventilation for at least *30 sec* and/or thoracic compressions as in international guidelines or any drug
- <sup>7</sup> **RDS (Respiratory Distress Syndrome)=** tick this box for a baby with respiratory distress lasting more than 24 hours
- <sup>8</sup> **Major birth trauma=** include here brachial plexus injury/arm palsy, fractures at any site, sub-aponeurotic (subgaleal) hemorrhage. Do NOT include here cephaloematoma and caput succedaneum
- <sup>9</sup> **Major Malformation=** do not include here minor malformation such as skin tags and pits, syndactyly, polydactyly, additional finger, PDA even if persistent.
- <sup>10</sup> **Day of death=** for still birth use day zero

<sup>12</sup> **ANNEX 1 DEFINITIONS ORGAN DYSFUNCTION (SOURCE: WHO MANUAL)****Organ dysfunction / life-threatening conditions**

- C0 Cardiovascular dysfunction**  
[shock, use of continuous vasoactive drugs, cardiac arrest, cardio-pulmonary resuscitation, severe hypoperfusion (lactate  $>5$  mmol/L or  $>45$ mg/dL) or severe acidosis (pH $<7.1$ )]
- C1 Respiratory dysfunction**  
[acute cyanosis, gasping, severe tachypnea (respiratory rate $>40$  bpm), severe bradypnea (respiratory rate $<6$  bpm), severe hypoxemia (PAO<sub>2</sub>/FiO<sub>2</sub> $<200$  O<sub>2</sub> saturation  $<90\%$  for  $\geq 60$ min) or intubation and ventilation not related to anaesthesia]
- C2 Renal dysfunction**  
[oliguria non responsive to fluids or diuretics, dialysis for acute renal failure or severe acute azotemia (creatinine  $\geq 300$ umol/ml or  $\geq 3.5$ mg/dL)]
- C3 Coagulation/hematologic dysfunction**  
[failure to form clots, massive transfusion of blood or red cells ( $\geq 5$  units) or severe acute thrombocytopenia ( $<50,000$  platelets/ml)]
- C4 Hepatic dysfunction**  
[jaundice in the presence of pre-eclampsia, severe acute hyperbilirubinemia (bilirubin $>100$ umol/L or  $>6.0$ mg/dL)]
- C5 Neurologic dysfunction**  
[prolonged unconsciousness / coma (lasting  $>12$  hours), stroke, status epilepticus / uncontrollable fits, total paralysis]
- C6 Uterine dysfunction / Hysterectomy**  
[haemorrhage or infection leading to hysterectomy]

## Appendix 2. Missing variables

|                                               | Total | Missing | % Missing |
|-----------------------------------------------|-------|---------|-----------|
| <b>Maternal variables</b>                     |       |         |           |
| Age                                           | 7504  | 34      | 0.4       |
| Work                                          | 7504  | 38      | 0.5       |
| Education                                     | 7504  | 37      | 0.4       |
| Para (number of children)                     | 7504  | 34      | 0.4       |
| Marital status                                | 7504  | 38      | 0.5       |
| Gravidas (pregnancies, including the ongoing) | 7504  | 34      | 0.4       |
| Born alive                                    | 7504  | 34      | 0.4       |
| Gestational age at delivery                   | 7504  | 47      | 0.6       |
| Gestational age estimated with ultrasounds    | 7504  | 53      | 0.7       |
| BMI                                           | 7504  | 53      | 0.7       |
| Discharge                                     | 7504  | 35      | 0.4       |
| Delivery                                      | 7504  | 32      | 0.4       |
| Multiple pregnancies                          | 7504  | 34      | 0.4       |
| Pregestetional hypertension                   | 7504  | 33      | 0.4       |
| Gestetional hypertension (no proteinuria)     | 7504  | 35      | 0.4       |
| Pre-eclampsia not severe                      | 7504  | 35      | 0.4       |
| Pre-eclampsia severe                          | 7504  | 35      | 0.4       |
| Eclampsia                                     | 7504  | 34      | 0.4       |
| Chorionamnionitis                             | 7504  | 36      | 0.4       |
| Major fetal malformation                      | 7504  | 36      | 0.4       |
| IUGR/SGA                                      | 7504  | 36      | 0.4       |
| Pregestetional diabetes                       | 7504  | 35      | 0.4       |
| Gestetional diabetes mellitus in diet         | 7504  | 35      | 0.4       |
| Gestetional diabetes mellitus in drug therapy | 7504  | 36      | 0.4       |
| Maternal cardiac disease                      | 7504  | 34      | 0.4       |
| Maternal hypothyroidism                       | 7504  | 37      | 0.4       |
| Polihydramnios                                | 7504  | 36      | 0.4       |
| Oligohydramnios                               | 7504  | 38      | 0.4       |
| APH/major placentia previa                    | 7504  | 37      | 0.4       |
| Severe anaemia                                | 7504  | 38      | 0.5       |
| Other (risk factors)                          | 7504  | 63      | 0.8       |
| Steroids                                      | 7504  | 37      | 0.4       |

|    |                                   |      |    |     |
|----|-----------------------------------|------|----|-----|
| 1  | Previous CS                       | 7504 | 38 | 0.5 |
| 2  | If previous CS, trial of labour   | 7504 | 39 | 0.4 |
| 3  | Presentation                      | 7504 | 37 | 0.4 |
| 4  | Labour onset                      | 7504 | 36 | 0.4 |
| 5  | Delivery mode                     | 7504 | 37 | 0.4 |
| 6  | If CS, type                       | 7504 | 37 | 0.4 |
| 7  | Indication of labour              | 7504 | 36 | 0.4 |
| 8  | Mode of induction                 | 7504 | 42 | 0.5 |
| 9  | If operative delivery, indication | 7504 | 38 | 0.5 |
| 10 | Episiotomy                        | 7504 | 43 | 0.5 |
| 11 | Analgesia in labour               | 7504 | 43 | 0.5 |
| 12 | 3 <sup>rd</sup> stage management  | 7504 | 39 | 0.5 |
| 13 | Removal of placenta               | 7504 | 39 | 0.5 |
| 14 | Operator delivery                 | 7504 | 41 | 0.5 |
| 15 | Perineal tears                    | 7504 | 36 | 0.4 |
| 16 | PPH                               | 7504 | 38 | 0.5 |
| 17 | Blood transfusion                 | 7504 | 36 | 0.4 |
| 18 | Cord collapse                     | 7504 | 42 | 0.5 |
| 19 | Uterine rupture                   | 7504 | 42 | 0.5 |
| 20 | Admission to ICU                  | 7504 | 22 | 0.2 |
| 21 | OT after delivery                 | 7504 | 43 | 0.5 |
| 22 | Sepsis/several infections         | 7504 | 44 | 0.5 |
| 23 | Other complications               | 7504 | 45 | 0.6 |
| 24 | Abruption placentae               | 7504 | 42 | 0.5 |
| 25 | Amniotic fluid embolism           | 7504 | 42 | 0.5 |
| 26 | Major organ dysfunction           | 7504 | 37 | 0.4 |
| 27 | Hysterectomy                      | 7504 | 36 | 0.4 |
| 28 | DVT                               | 7504 | 46 | 0.6 |
| 29 | Final outcome                     | 7504 | 42 | 0.5 |
| 30 | Near miss                         | 7504 | 20 | 0.2 |
| 31 | <b>Newborn variables †</b>        |      |    |     |
| 32 | Born                              | 7504 | 43 | 0.5 |
| 33 | If stillbirth, fresh or macerated | 7504 | 75 | 1.0 |

|                                                |      |     |     |
|------------------------------------------------|------|-----|-----|
| Sex                                            | 7504 | 51  | 0.6 |
| Birth weight                                   | 7504 | 68  | 0.9 |
| Apgar at 1'                                    | 7504 | 168 | 2.2 |
| Apgar at 5'                                    | 7504 | 168 | 2.2 |
| Apgar at 10'                                   | 7504 | 166 | 2.2 |
| Ventilated in delivery room                    | 7504 | 119 | 1.5 |
| Asphyxia                                       | 7504 | 124 | 1.6 |
| Post-delivery                                  | 7504 | 44  | 0.5 |
| Respiratory distress syndrome                  | 7504 | 114 | 1.5 |
| Other infections                               | 7504 | 110 | 1.4 |
| Neurological complications (seizure, IVH, HIE) | 7504 | 114 | 1.5 |
| Jaundice with ET                               | 7504 | 112 | 1.4 |
| Major birth trauma                             | 7504 | 120 | 1.6 |
| Phototherapy for over 24 hours                 | 7504 | 121 | 1.6 |
| Sepsis                                         | 7504 | 113 | 1.5 |
| Major malformation                             | 7504 | 120 | 1.6 |
| Other complications                            | 7504 | 172 | 2.3 |
| Final                                          | 7504 | 108 | 1.4 |

Abbreviations: APH= ante-partum haemorrhage; BMI= body Mass index; CS= caesarian section; DVT= deep vein thrombosis; ET= exchange transfusion; HIE= Hypoxic Ischemic Encephalopathy; ICU= Intensive care unit; IUGR=Intra-uterine growth restriction; IVH= intra-ventricular haemorrhage; OT=operating theatre; PPH= post-partum haemorrhage; SGA= small for gestational age.

<sup>†</sup> For multiple pregnancies, only data on the first newborn provided



# BMJ Open

## Implementation of an individual-patient prospective database of hospital births in Sri Lanka and its use for improving quality of care

|                                 |                                                                                                                                                                                                                                                                                                                                                                                                                                                                                                                                                                                                                                                                                                                                                                                                                                                                                                                                                                                                                                                                                                                                                                                                                                                                                                                                                                                                                                                                                                                                                                                                                                                                                                                                                                                                                                                                                                     |
|---------------------------------|-----------------------------------------------------------------------------------------------------------------------------------------------------------------------------------------------------------------------------------------------------------------------------------------------------------------------------------------------------------------------------------------------------------------------------------------------------------------------------------------------------------------------------------------------------------------------------------------------------------------------------------------------------------------------------------------------------------------------------------------------------------------------------------------------------------------------------------------------------------------------------------------------------------------------------------------------------------------------------------------------------------------------------------------------------------------------------------------------------------------------------------------------------------------------------------------------------------------------------------------------------------------------------------------------------------------------------------------------------------------------------------------------------------------------------------------------------------------------------------------------------------------------------------------------------------------------------------------------------------------------------------------------------------------------------------------------------------------------------------------------------------------------------------------------------------------------------------------------------------------------------------------------------|
| Journal:                        | <i>BMJ Open</i>                                                                                                                                                                                                                                                                                                                                                                                                                                                                                                                                                                                                                                                                                                                                                                                                                                                                                                                                                                                                                                                                                                                                                                                                                                                                                                                                                                                                                                                                                                                                                                                                                                                                                                                                                                                                                                                                                     |
| Manuscript ID                   | bmjopen-2018-023706.R2                                                                                                                                                                                                                                                                                                                                                                                                                                                                                                                                                                                                                                                                                                                                                                                                                                                                                                                                                                                                                                                                                                                                                                                                                                                                                                                                                                                                                                                                                                                                                                                                                                                                                                                                                                                                                                                                              |
| Article Type:                   | Research                                                                                                                                                                                                                                                                                                                                                                                                                                                                                                                                                                                                                                                                                                                                                                                                                                                                                                                                                                                                                                                                                                                                                                                                                                                                                                                                                                                                                                                                                                                                                                                                                                                                                                                                                                                                                                                                                            |
| Date Submitted by the Author:   | 05-Dec-2018                                                                                                                                                                                                                                                                                                                                                                                                                                                                                                                                                                                                                                                                                                                                                                                                                                                                                                                                                                                                                                                                                                                                                                                                                                                                                                                                                                                                                                                                                                                                                                                                                                                                                                                                                                                                                                                                                         |
| Complete List of Authors:       | Lizzerini, Marzia; WHO Collaborating Centre Trieste, Institute for Maternal and Child Health IRCCS Burlo Garofolo<br>Senanayake, H.; Faculty of Medicine, Department of Obstetrics & Gynaecology, University of Colombo; University Obstetrics Unit, De Soysa Hospital for Women, Colombo, Sri Lanka<br>Mohamed , Rishard ; Faculty of Medicine, Department of Obstetrics & Gynaecology, University of Colombo; University Obstetrics Unit, De Soysa Hospital for Women, Colombo, Sri Lanka<br>Kaluarachchi, Athula; Faculty of Medicine, Department of Obstetrics & Gynaecology, University of Colombo; University Obstetrics Unit, De Soysa Hospital for Women, Colombo, Sri Lanka<br>Fernando , Roshini; Faculty of Medicine, Department of Obstetrics & Gynaecology, University of Colombo<br>Sakalasuriya , Anshumalie; Faculty of Medicine, Department of Obstetrics & Gynaecology, University of Colombo<br>Ihsan , Fathima Reshma; Faculty of Medicine, Department of Obstetrics & Gynaecology, University of Colombo<br>Saravanabhava , Namasivayam; District Hospital Thellipalai, Thellipalai, Sri Lanka<br>Gamaathige , Nalin; De Soysa Hospital for Women, Colombo, Sri Lanka, Neonatology Unit<br>Jayawardena , Madura ; Department of Obstetrics & Gynaecology, Faculty of Medical Sciences, University of Sri Jayawardenapura<br>Gamage, Ruwan Vidana; Base Hospital, Balangoda<br>Covi, Benedetta; WHO Collaborating Centre Trieste, Institute for Maternal and Child Health IRCCS Burlo Garofolo<br>Wanzira, Humphey; WHO Collaborating Centre Trieste, Institute for Maternal and Child Health IRCCS Burlo Garofolo<br>Businelli, Caterina; Institute for Maternal and Child Health IRCCS Burlo Garofolo, Department of Maternal and Newborn Health<br>Piccoli, Monica ; Institute for Maternal and Child Health IRCCS Burlo Garofolo, Department of Maternal and Newborn Health |
| <b>Primary Subject Heading</b>: | Health services research                                                                                                                                                                                                                                                                                                                                                                                                                                                                                                                                                                                                                                                                                                                                                                                                                                                                                                                                                                                                                                                                                                                                                                                                                                                                                                                                                                                                                                                                                                                                                                                                                                                                                                                                                                                                                                                                            |
| Secondary Subject Heading:      | Obstetrics and gynaecology, Global health, Health informatics                                                                                                                                                                                                                                                                                                                                                                                                                                                                                                                                                                                                                                                                                                                                                                                                                                                                                                                                                                                                                                                                                                                                                                                                                                                                                                                                                                                                                                                                                                                                                                                                                                                                                                                                                                                                                                       |
| Keywords:                       | Maternal medicine < OBSTETRICS, Quality in health care < HEALTH SERVICES ADMINISTRATION & MANAGEMENT, HEALTH SERVICES                                                                                                                                                                                                                                                                                                                                                                                                                                                                                                                                                                                                                                                                                                                                                                                                                                                                                                                                                                                                                                                                                                                                                                                                                                                                                                                                                                                                                                                                                                                                                                                                                                                                                                                                                                               |

1  
2  
3  
4  
5  
6  
7  
8  
9  
10  
11  
12  
13  
14  
15  
16  
17  
18  
19  
20  
21  
22  
23  
24  
25  
26  
27  
28  
29  
30  
31  
32  
33  
34  
35  
36  
37  
38  
39  
40  
41  
42  
43  
44  
45  
46  
47  
48  
49  
50  
51  
52  
53  
54  
55  
56  
57  
58  
59  
60

|  |                                                                                                             |
|--|-------------------------------------------------------------------------------------------------------------|
|  | ADMINISTRATION & MANAGEMENT, International health services <<br>HEALTH SERVICES ADMINISTRATION & MANAGEMENT |
|  |                                                                                                             |

SCHOLARONE™  
Manuscripts



# Implementation of an individual-patient prospective database of hospital births in Sri Lanka and its use for improving quality of care

**Short title: Individual patient maternal and newborn database to improve quality of care in Sri Lanka**

Marzia Lazzerini,<sup>1</sup> Hematha Senanayake,<sup>2,3</sup> Rishard Mohamed,<sup>2,3</sup> Athula Kaluarachchi,<sup>2,3</sup>,  
Roshini Fernando,<sup>3</sup> Anshumalie Sakalasuriya,<sup>3</sup> Fathima Reshma Ihsan,<sup>3</sup> Namasivayam  
Saravanabhava,<sup>4</sup> Nalin Gamaathige,<sup>5</sup> Madura Jayawardena,<sup>6</sup> Ruwan Vidana Gamage,<sup>7</sup>  
Benedetta Covi,<sup>1</sup> Humphrey Wanzira,<sup>1</sup> Caterina Businelli,<sup>1</sup> Monica Piccoli.<sup>1</sup>

<sup>1</sup> Institute for Maternal and Child Health IRCCS Burlo Garofolo, Trieste, Italy.

<sup>2</sup> University Obstetrics Unit, De Soysa Hospital for Women, Colombo, Sri Lanka

<sup>3</sup> Faculty of Medicine, Department of Obstetrics & Gynaecology, University of Colombo, Colombo, Sri Lanka.

<sup>4</sup> District Hospital Thellipalai, Thellipalai, Sri Lanka.

<sup>5</sup> Neonatology Unit, De Soysa Hospital for Women, Colombo, Sri Lanka

<sup>6</sup> Department of Obstetrics & Gynaecology, Faculty of Medical Sciences, University of Sri Jayawardenapura,  
Nugegoda 10250, Sri Lanka

<sup>7</sup> Base Hospital, Balangoda, Sri Lanka

## Authors' e-mail contacts

ML: marzia.lazzerini@burlo.trieste.it

HS: senanayakeh@gmail.com

RM: mrishard@obg.cmb.ac.lk

AK: akaluarachchi@obg.cmb.ac.lk

RF: ragynobs2009@gmail.com

AS: sakalasuriyasaritha43@gmail.com

FRI: resh.ihsan798@gmail.com

NS: sarabhava@yahoo.com

NG: nalinnicu@gmail.com

MJ: madurammj@yahoo.com

RVG: ruwangamage21@yahoo.com

BC: benedetta.covi@burlo.trieste.it

HW: humphrey.wanzira@burlo.trieste.it

CB: caterina.businelli@burlo.trieste.it

MP: monica.piccoli@burlo.trieste.it

1  
2  
3  
4  
5  
6  
7  
8  
9  
10  
11  
12  
13  
14  
15  
16  
17  
18  
19  
20  
21  
22  
23  
24  
25  
26  
27  
28  
29  
30  
31  
32  
33  
34  
35  
36  
37  
38  
39  
40  
41  
42  
43  
44  
45  
46  
47  
48  
49  
50  
51  
52  
53  
54  
55  
56  
57  
58  
59  
60

**Corresponding author**

Marzia Lazzerini DTMH, MSc, PhD  
WHO Collaborating Centre for Maternal and Child Health  
Institute for Maternal and Child Health IRCCS Burlo Garofolo  
Via dell'Istria 65/1, 34137, Trieste, ITALY  
Email: marzia.lazzerini@burlo.trieste.it

For peer review only

## ABSTRACT

**Objectives** This study was aimed at piloting a prospective individual patient database on hospital deliveries in Colombo, Sri Lanka, and at exploring its use for developing recommendations for improving quality of care (QoC).

**Design** Observational study.

**Setting** De Soysa Maternity Hospital, the largest referral hospital for maternity care in Sri Lanka.

**Data collection and analysis** From July 2015 to June 2017, 150 variables were collected for each delivery using a standardised form and entered into a database. Data were analysed every eight months and the results made available to local staff. Outcomes of the study included: technical problems; data completeness; data accuracy; key database findings; use of data.

**Results** 7504 deliveries were recorded. No technical problem was reported. Data completeness exceeded that of other existing hospital recording systems. Less than 1 % data were missing for maternal variables, and less than 3% for newborn variables. Mistakes in data collection and entry occurred in 0.01% and 0.09% of maternal and newborn data respectively. Key QoC indicators identified in comparison to international standards were: relatively low maternal mortality (0.053%); relatively high maternal near-miss cases (3.4%); high rate of induction of labour (24.6%), caesarean section (30.0%) and episiotomy (56.1%); relatively high rate of preterm births (9.4%), low-birth-weight rate (16.5%), stillbirth (0.97%), and of total deaths in newborn (1.98%). Recommendations developed focused on the key indicators identified and included the use of a checklist to standardise case management, training, clinical audits, and more information for patients. Based on this experience, a list of lessons learnt was drawn.

**Conclusions** The study shows that the implemented system of data collection can produce a large quantity of reliable information. Most importantly, this experience provides an example on how database findings can be used for discussing hospital practices, identifying gaps, and to agree on recommendations for improving QoC.

## Article summary: strengths and limitations of this study

- The study has the strength of reporting on the first individual patient database for comprehensive prospective data collection on births in Sri Lanka. Very few individual patient databases exist in general in low and middle-income countries (LMIC). Although this is a single-center study, it has potential for use as a model for future scale up.
- As additional strengths, the study has the merit of reporting both technical feasibility related to the database implementation, quality of data (ie, data completeness and accuracy), lessons learned and actual use of data – the latter three being often neglected issues.
- Limitations of this study include that within the project timelines (2 years), it was not possible to follow up the impact of the recommendations developed.

### Keywords

Quality of care; Health Information system; mothers and newborns.

### Disclosure of interests

None competing interest

### List of abbreviations

LMIC = low and middle-income countries

MMR= maternal mortality ratio

QoC= Quality of Care

WHO = World Health Organization

## BACKGROUND

The availability of an actionable health information system is one of the key components of the World Health Organisation (WHO) framework for improving the quality of maternal and newborn health care (1,2) and one of the recommended cross-cutting actions in the WHO Strategy for Ending Preventable Maternal Mortality (EPMM) (3). According to WHO standards (2), “the health information systems should enable using data to ensure timely actions to improve the care of every woman and newborn”. More specifically, a health facility should have mechanisms for data collection, analysis and feedback as part of the activities for monitoring and improving performance around the time of childbirth (2).

However, estimates have highlighted major gaps in data collection even on key indicators: only one third of countries have the capacity to count or register maternal deaths (3,4) and less than two fifths of all countries have a complete civil registration system with accurate attribution of the cause of death (3,5). Quality of data is also an area of significant concern: according to a WHO review, although most countries are using some core indicators to monitor performance in maternal and newborn care, virtually no low- or lower-middle-income country has a full system of data sharing and transparent quality control in place (6). The availability of accurate data is relatively limited even in high-income countries, where most often hospital administrative datasets lack key information - such as maternal risk factors needed for evaluating the case mix and interpreting the observed outcomes (7).

Sri Lanka is a lower middle-income country (8). Since the end of the civil war in 2009, the economy has grown on average at 6.2% per year (8), transiting from a predominantly rural-based economy to one that is urban-oriented around manufacturing and services. Major progress has been made in maternal healthcare in past decades: according to the last estimates the reported maternal mortality ratio (MMR) is relatively low (33.7/100.000) (9). However, no significant improvement in the MMR has been observed in the last 10 years (8-11). The latest national Maternal Mortality Review has shown that 50% of maternal deaths are from direct causes, with preventable causes, such as post-partum haemorrhage and sepsis, being among the top five causes of death (9). Almost 80% of all women died in hospitals (9), where specialized facilities are available, thus suggesting possible gaps in the quality of care provided (9). Inappropriate practices are suggested also by other indicators, such as the rising rate of caesarean section (CS) (12), peaking above 50% in selected facilities (12). The estimated rate of induction of labour in Sri Lanka is currently among the highest in Asia (35.5%) and the rate of inductions without medical indication is reported to be 27.8% (13).

1  
2  
3 Presently in Sri Lanka the health information system collects data only on selected maternal and  
4 newborn indicators, in an aggregate form. The objective of this study was to pilot a system for  
5 collecting prospectively for each delivery, a large number of maternal and newborn variables in the  
6 largest maternity unit in Sri Lanka,. The paper also aimed at reporting on the use of data for  
7 developing recommendations to improve the quality of hospital care in a participatory manner.  
8  
9  
10  
11  
12

## 13 **METHODS**

### 16 **Population and setting**

17 The study was conducted at the De Soysa Hospital for Women in Colombo, the largest referral  
18 hospital for maternity care in Sri Lanka. Previous collaborations among the involved institutions  
19 provided the opportunity to establish an international working group dedicated to improving the  
20 quality of maternal hospital care. It was agreed that establishing a system of data collection and  
21 fostering data use were two necessary steps toward this direction. In June 2015, a database for  
22 routinely collecting individual patient data was implemented in wards 3 and 15, the two wards of  
23 the University Obstetrics Unit in the hospital, where about half of the total deliveries of the hospital  
24 take place. All deliveries occurring in these two wards, with no exclusions, were to be entered in  
25 the database. This paper reports findings of the first 24 months of data collection, from July 2015 to  
26 June 2017.  
27  
28  
29  
30  
31  
32  
33  
34

### 35 **Data collection tools**

36 For each delivery, data were collected in a standardised form ("Yellow Form") and entered in a  
37 database. The "Yellow Form" was two pages long (**Appendix 1**), and recorded 150 variables for  
38 each delivery. These included demographic and socio-economic data of the woman (8 variables);  
39 characteristics of pregnancy and risk factors (28 variables); process of care during birth (60  
40 variables); maternal health outcomes (31 variables); newborn health at birth and during  
41 hospitalisation, process of care and health outcomes (23 variables). The database was developed  
42 using Epidata (14), a free software that allows for inclusion of internal checks. Data were collected  
43 and entered in the database by trained data collectors.  
44  
45  
46  
47  
48  
49  
50

### 51 **Data quality assurance procedures**

52 The Yellow Form was developed through a participatory approach with local staff. The team  
53 involved included: six senior obstetricians from De Soysa Hospital and other hospitals in Sri Lanka,  
54 eight midwifery-qualified nurses, two Registrars in obstetrics and gynaecology, one neonatologist,  
55 one Registrar in neonatology and two data collectors. Two external researchers (one obstetrician  
56 and one epidemiologist) participated as facilitators. Variables were selected based on the  
57 literature (1,2,6,7) and on previous experience of the team, so that it would allow answering  
58  
59  
60

1  
2  
3 research questions and monitoring trends over time. Case-definitions were derived from  
4 international literature (15-18). Instructions on how to fill the form and specific case definitions were  
5 developed in parallel with the development of the form and embedded into it (Appendix 1).  
6  
7

8  
9 All relevant information was extracted from the medical files. We chose to use a paper-based  
10 system of data collection since it allowed checking for internal consistency of data prior to being  
11 entered in the database.  
12  
13

14  
15 The data collection form, the instructions on how to fill it and how to transfer information into the  
16 database were field-tested. Procedures of data collection were field tested to evaluate the following  
17 domains: if the sequence of data in the form was appropriate; if case definitions were clear; if data  
18 collectors were able to fill the form and enter data in the database; if time needed to fill the form  
19 and enter data in the database was acceptable to allow routine data collection; if there were  
20 sources of systematic error or bias; if there was any technical problem. Data collectors were  
21 young medical doctors who were trained on the standard operating procedures (SOP) of data  
22 collection and data entry and supervised over time.  
23  
24  
25  
26  
27  
28

29  
30 The database was designed in a way that the interface for data entry was almost identical to the  
31 "Yellow Form". To further minimise data-entry errors, the database contained 137 internal  
32 automatic validation rules, aiming at minimising errors in biological plausibility of data (i.e. normal  
33 ranges), data completeness and internal consistency.  
34  
35  
36  
37

38 For the initial period of data collection for each case of delivery two data collectors independently  
39 filled a Yellow Form and data were cross-checked to evaluate consistency. This procedure was  
40 continued until when errors in data collection were consistently low (ie. below 0.02%; this was  
41 achieved in a period of about 1 month). Subsequently, data completeness and accuracy in data  
42 collection and data entry were monitored by an external independent data monitor who randomly  
43 reviewed 5% of forms and 5% of the entered cases. Missing cases or errors in data collection/entry  
44 were corrected in real time. Data were also externally monitored for completeness and internal  
45 consistency at about four month intervals.  
46  
47  
48  
49  
50

### 51 52 **Data analysis and use**

53 Data were analysed at intervals of eight months using a standardized plan for analysis, pre-defined  
54 and agreed among partners. This included: a descriptive analysis of all the key variables in the  
55 database; an analysis of CS groups according to the Robson Classification (17,18) and other minor  
56 secondary analyses as suggested by the finding of the primary analysis and as requested by  
57 partners. Data were analysed by the external team (WHO Collaborating Centre) and made  
58  
59  
60

1  
2  
3 available as tables and graphs to the local staff at the De Soysa Hospital. Data were provided with  
4 the purpose of being locally discussed in dedicated workshops and used to develop  
5 recommendations to improve the quality of care.  
6  
7  
8  
9

## 10 Outcomes

11 Outcomes of the study are reported in Box 1 and described below. Technical problems in data  
12 collection were defined as any technical problem occurring with the use of the database (either  
13 with the software or with the computer). These had to be notified by data collectors in real time to  
14 the local coordinator and to the external team.  
15  
16  
17  
18

19 Database completeness was checked by an independent assessor by comparing the number of  
20 cases entered in the database with data in the official hospital registers and specifically with the  
21 following eight data sources: i) birth register; ii) intensive care unit (ICU) admissions register; iii)  
22 operating theatre (OT) register; iv) neonatal intensive care unit (NICU) admissions register; v)  
23 Special Care Baby Unit (SCBU) admissions register; vi) maternal death reviews; vii) perinatal  
24 mortality and morbidity statistics; viii) monthly reports.  
25  
26  
27  
28  
29

30 The number of missing cases for each variable was calculated as the number of missing cases in  
31 the database out of the total expected entries for that variable.  
32  
33  
34

35 Accuracy in data collection was measured by the number of variables correctly recorded in the  
36 yellow form when compared to the original medical files. Accuracy in data entry was measured by  
37 the number of variables correctly recorded in the database compared to the yellow forms. Both  
38 accuracy in data collection and data entry were assessed by an external independent data  
39 collector who randomly checked 5% of forms and 5% of entered cases, respectively.  
40  
41  
42  
43  
44

45 Database findings included a descriptive analysis of the key variables as agreed among partners.  
46 Data on multiple pregnancies were not included in this primary descriptive analysis of newborn  
47 outcomes. Use of data for quality improvement purposes included any action-oriented  
48 recommendation generated from review of the data outcomes by researchers and partners  
49  
50  
51  
52  
53  
54

### 55 Box 1. Outcomes of the study

- |    |                                                                         |
|----|-------------------------------------------------------------------------|
| 56 | <b>i) Technical problems:</b>                                           |
| 57 | - any type of technical problem in implementing and using the database. |
| 58 |                                                                         |
| 59 | <b>ii) Data completeness:</b>                                           |
| 60 |                                                                         |



- number of cases entered in the database versus data in the official registers;
- number of missing cases for each variable in the database.

iii) **Data accuracy:**

- number of correct variables in the yellow form versus the original medical files;
- number of correct variables in the database compared to the yellow forms.

iv) **Database findings:**

- descriptive analysis of the key variables as agreed among partners.

v) **Use of data for quality improvement purposes:**

- any action-oriented recommendation generated from review of the data outcomes by researchers and partners.

### **Ethical considerations**

The study was approved by the Ethics Review Committee of the Faculty of Medicine, University of Colombo. Confidentiality was maintained by de-identifying all files before database entry. Human subjects were not directly involved in the study. Informed consent was not requested by the Ethics Review Committee.

### **Patient and Public Involvement**

Patient or public were not directly involved in the study. However, the selection of the variables to be included in the database was informed by patient experience, as reported in literature (16) The development of recommendations for improving the quality of care took into account the importance of effective communication with patients.

## **RESULTS**

### **Technical problems**

No technical problems occurred. The data collectors reported that there were no technical difficulties in managing the database.

### **Data completeness**

**Table 1** reports the number of total cases in the database when compared to other official hospital data sources. Numbers were matching, except for the cases of hysterectomies, for which the database appear to contain one additional case (verified as actually being a real case).

**Table 1. Number of cases in the database compared to hospital registers and other official sources of data**

|                                        | Database | Hospital registers | Source of data for comparison                                                           |
|----------------------------------------|----------|--------------------|-----------------------------------------------------------------------------------------|
| <b>Maternal indicators</b>             |          |                    |                                                                                         |
| Total deliveries                       | 7504     | 7504               | Birth register                                                                          |
| Maternal deaths                        | 4        | 4                  | Maternal deaths reviews                                                                 |
| Admission to ICU                       | 239      | 239                | ICU register                                                                            |
| PPH                                    | 147      | 147                | Birth register                                                                          |
| OT after delivery                      | 11       | 11                 | OT register                                                                             |
| Hysterectomy                           | 22       | 21                 | OT register                                                                             |
| <b>Newborn indicators <sup>1</sup></b> |          |                    |                                                                                         |
| Stillbirth                             | 82       | 82                 | Birth register, monthly reports                                                         |
| Admission to NICU                      | 105      | 105                | NICU register                                                                           |
| Admission to SCBU                      | 1121     | 1121               | SCBU register                                                                           |
| Neonatal deaths after birth            | 81       | 81                 | Birth register + NICU and SCBU registers + perinatal mortality and morbidity statistics |

Notes: <sup>1</sup> Including also the second twin in multiple pregnancies.

Abbreviation: ICU= Intensive care unit; NICU= Neonatal intensive care unit; OT= operating theatre; PPH= post-partum haemorrhage; SCBU= semi-intensive baby unit

The number of missing variables is reported in **Appendix 2**. Missing data were less than 1% for all maternal variables, and less than 2% in all but two newborn variables.

### Data accuracy

Random checks by an independent data monitor on 5% of Yellow Forms and 5% of entered cases revealed that mistakes in data collection in the forms occurred in 0.01% of cases, while mistakes in data entry in the database occurred in 0.09% of cases.

### Database findings

**Tables 2,3 and 4** report the descriptive analysis of key indicators in the database. Overall, during the two years of the study period, 7504 deliveries were recorded (Table 2). In terms of socio-demographic characteristics, most women belonged to the following categories: 4253 (56.7%) were 25 to 34 years old; 6028 (80.3%) had secondary education; 6253 (83.3%) were housewives;

5231 (69.7%) had a normal nutritional status. Overall, in 4182 (55.7%) of deliveries there was either a maternal or foetal medical condition or a risk factor that indicated operative delivery or a negative outcome. The most prevalent among these were: gestational diabetes (13.4%), pre or post-term delivery (12.9%), and previous CS (12.7%). Overall 2870 (38.2%) were primigravidae. Analysing the population according to Robson classification, the most prevalent groups were: group 3 (multiparous, single cephalic, at term in spontaneous labour), (27.1%); group 1 (nulliparous, single cephalic, at term, in spontaneous labour) (23.2%); group 2a (nulliparous, single cephalic, at term, induced), (12.8%); group 5 (previous CS, single cephalic at term), (10.9%).

**Table 2. Maternal characteristics**

|                                          | n<br>(N=7504) | %     |
|------------------------------------------|---------------|-------|
| <b>Age categories</b>                    |               |       |
| < 18 years                               | 95            | 1.2   |
| 18-24 years                              | 1862          | 24.8  |
| 25-34 years                              | 4253          | 56.6  |
| 35-39 years                              | 1036          | 13.8  |
| >40 years                                | 224           | 2.9   |
| Missing                                  |               |       |
| <b>Number of pregnancies<sup>1</sup></b> |               |       |
| 1                                        | 2870          | 38.24 |
| 2                                        | 2313          | 30.82 |
| ≥3                                       | 2285          | 30.47 |
| Missing                                  | 34            | 0.45  |
| <b>Education</b>                         |               |       |
| None                                     | 23            | 0.31  |
| Primary                                  | 235           | 3.13  |
| Secondary                                | 6028          | 80.33 |
| Higher                                   | 1181          | 15.74 |
| Missing                                  | 37            | 0.49  |
| <b>Work</b>                              |               |       |
| Not reported by the mother               | 77            | 1.03  |
| Working                                  | 1136          | 15.14 |
| Housewife                                | 6253          | 83.33 |
| Missing                                  | 38            | 0.51  |
| <b>Marital status</b>                    |               |       |
| Married                                  | 7350          | 97.95 |
| Unmarried                                | 96            | 1.28  |
| Living together                          | 20            | 0.27  |
| Missing                                  | 38            | 0.51  |

|                                                                  |      |       |
|------------------------------------------------------------------|------|-------|
| <b><i>Nutritional status<sup>2</sup></i></b>                     |      |       |
| Underweight                                                      | 670  | 8.93  |
| Normal                                                           | 5231 | 69.71 |
| Overweight                                                       | 1110 | 14.79 |
| Obese                                                            | 440  | 5.86  |
| Missing                                                          | 53   | 0.71  |
| <b><i>Medical conditions /risk factors (any)<sup>3</sup></i></b> | 4182 | 55.73 |
| <b><i>Gestational diabetes, total</i></b>                        | 1002 | 13.36 |
| On medical nutrition therapy                                     | 417  | 5.56  |
| On drug therapy                                                  | 585  | 7.80  |
| Gestational age <37 >= 41weeks                                   | 966  | 12.87 |
| Previous CS                                                      | 956  | 12.74 |
| <b><i>Hypertensive disorders of pregnancy, any</i></b>           | 506  | 6.74  |
| Pre-gestational hypertension                                     | 168  | 2.24  |
| Gestational hypertension                                         | 179  | 2.39  |
| Pre-eclampsia not severe                                         | 78   | 1.04  |
| Pre-eclampsia severe                                             | 69   | 0.92  |
| Eclampsia                                                        | 12   | 0.16  |
| IUGR at ultrasound                                               | 504  | 6.72  |
| Obesity                                                          | 440  | 5.86  |
| Breech/transverse/oblique lie                                    | 339  | 4.52  |
| Pre-gestational diabetes                                         | 266  | 3.54  |
| Maternal cardiac disease                                         | 234  | 3.12  |
| Fetal conditions, other                                          | 223  | 3.10  |
| Maternal hypothyroidism                                          | 219  | 2.92  |
| Maternal age >40                                                 | 224  | 2.9   |
| Oligohydramnios                                                  | 131  | 1.75  |
| APH                                                              | 112  | 1.49  |
| Polyhydramnios                                                   | 96   | 1.28  |
| Multiple pregnancies                                             | 84   | 1.12  |
| Severe anaemia                                                   | 40   | 0.53  |
| Chorioamnionitis                                                 | 11   | 0.15  |

Notes: <sup>1</sup> Including the ongoing pregnancy. <sup>2</sup> As defined by National Guidelines in Sri Lanka. <sup>3</sup> Any of the medical conditions/risk factors described in the following rows.

Abbreviations: APH= antepartum haemorrhage; CS= cesarean section; IUGR= intrauterine growth restriction.

In terms of process indicators and maternal outcomes (**Table 3**), 1849 (24.6%) of women had their labour induced, and 2251 (30.0%) had a CS. Rate of vaginal birth after CS (VBAC) was 17.1%. Episiotomy was performed in 4213 (56.1%) of women. In terms of health outcomes, there were

four cases of maternal death (0.053%). Overall 254 (3.38%) of cases were identified as maternal near miss. Postpartum haemorrhage (any severity) occurred in 147 (1.9%) women, with 39 (0.52%) women having a severe or massive haemorrhage. Overall there were 22 (0.29%) cases of hysterectomy. During the study period there were no cases of uterine rupture.

**Table 3. Birth process indicators and maternal outcomes**

|                                     | n<br>(N=7504) | %     |
|-------------------------------------|---------------|-------|
| <b><i>Labour onset</i></b>          |               |       |
| Spontaneous                         | 4726          | 62.98 |
| Induction                           | 1849          | 24.64 |
| Pre-labour CS                       | 893           | 11.90 |
| Missing                             | 36            | 0.48  |
| <b><i>Mode of delivery</i></b>      |               |       |
| Vaginal spontaneous                 | 4906          | 65.38 |
| Vaginal operative                   | 310           | 4.13  |
| Caesarean section                   | 2251          | 30.00 |
| Missing                             | 37            | 0.49  |
| <b><i>Caesarean section</i></b>     |               |       |
| In spontaneous labour onset         | 927           | 19.61 |
| In induction of labour              | 441           | 28.85 |
| <b><i>Episiotomy</i></b>            |               |       |
|                                     | 4213          | 56.14 |
| <b><i>Key maternal outcomes</i></b> |               |       |
| Maternal deaths                     | 4             | 0.05  |
| Admission to ICU                    | 239           | 3.18  |
| Near-miss cases <sup>2</sup>        | 254           | 3.38  |
| PPH                                 | 147           | 1.96  |
| OT after delivery                   | 11            | 0.15  |
| Hysterectomy                        | 22            | 0.29  |
| Uterine Rupture                     | 0             | 0     |
| Sepsis                              | 29            | 0.39  |
| DVT/PE                              | 2             | 0.03  |
| Abruptio placentae                  | 21            | 0.38  |
| Amniotic fluid embolism             | 0             | 0     |
| Perineal tears III-IV degree        | 17            | 0.23  |

Notes: <sup>1</sup> As for Robson's classification (17); <sup>2</sup> As for WHO classification (15)

Abbreviations: CS= caesarian section; DVT= Deep vein thrombosis; ICU= Intensive care unit; NICU= Neonatal intensive care unit; OT= operating theatre; PE= pulmonary embolism; PPH= post-partum haemorrhage.

The analysis of the characteristics of the neonates and outcomes (**Table 4**) pointed out the following key indicators: 73 (0.97%) were stillborn; 708 (9.4%) were born preterm (i.e. before 37 weeks of gestational age); 1243 (16.6%) were of low birthweight (i.e. below 2500 grams); 173 (2.3%) were ventilated for more than 10 seconds in the delivery room. Overall 917 (12.2%) newborns had at least one complication during their hospital stay, and among these the most frequent was respiratory distress syndrome (3.7%). Overall, 101 (1.62) newborns had major malformations. Overall 148 (1.98%) were either born dead or died while in hospital; among these cases (death either before or after birth), 55.1% had major malformations.

**Table 4. Newborns' characteristics and outcomes**

| <b>NEWBORN</b>                                       | n<br>(N=7504) <sup>1</sup> | %     |
|------------------------------------------------------|----------------------------|-------|
| <b>Sex</b>                                           |                            |       |
| Female                                               | 3644                       | 48.56 |
| Male                                                 | 3792                       | 50.83 |
| Missing                                              | 68                         | 0.91  |
| <b><i>Gestational age (weeks + days)</i></b>         |                            |       |
| < 33 + 6                                             | 223                        | 2.96  |
| 34 to 36+ 6                                          | 485                        | 6.19  |
| 37 to 40+ 6                                          | 6491                       | 86.50 |
| > 41                                                 | 258                        | 3.43  |
| Missing                                              | 47                         | 0.62  |
| <b><i>Weight at birth</i></b>                        |                            |       |
| <1499                                                | 149                        | 1.99  |
| 1500 to 1999                                         | 183                        | 2.44  |
| 2000 to 2499                                         | 911                        | 12.14 |
| 2500 to 3499                                         | 5365                       | 71.50 |
| 3500 to 4000                                         | 724                        | 9.65  |
| >4000                                                | 104                        | 1.39  |
| Missing                                              | 68                         | 0.91  |
| <b>Stillbirth, total</b>                             | 73                         | 0.97  |
| Macerated                                            | 42                         | 0.56  |
| Fresh                                                | 27                         | 0.36  |
| Missing                                              | 4                          |       |
| Ventilated in delivery room for more than 10 seconds | 173                        | 2.34  |
| Asphyxia                                             | 62                         | 0.84  |
| <b>Post-delivery</b>                                 |                            |       |
| With mother                                          | 6164                       | 82.14 |
| SCBU                                                 | 1105                       | 14.73 |

|                                              |            |              |
|----------------------------------------------|------------|--------------|
| NICU                                         | 96         | 1.28         |
| Referred                                     | 9          | 0.12         |
| Death                                        | 75         | 1            |
| Missing                                      | 11         | 0.07         |
| <b><i>Neonates with any complication</i></b> | <b>917</b> | <b>12.22</b> |
| <b><i>Complication</i></b>                   |            |              |
| RDS                                          | 276        | 3.73         |
| Infection, other than sepsis                 | 121        | 1.35         |
| Major malformation                           | 101        | 1.62         |
| Neurological <sup>2</sup>                    | 38         | 0.50         |
| Sepsis                                       | 28         | 0.38         |
| Major Birth Trauma                           | 16         | 0.21         |
| Severe jaundice with ET                      | 15         | 0.20         |
| Others <sup>3</sup>                          | 232        | 3.09         |
| <b>Final outcome</b>                         |            |              |
| Discharged                                   | 7204       | 96.00        |
| Discharged with disabilities                 | 4          | 0.05         |
| Death (including stillbirths)                | 148        | 1.98         |
| Referred                                     | 54         | 0.72         |
| LAMA                                         | 15         | 0.20         |

Notes: <sup>1</sup> Data on multiple pregnancies were not included in this primary analysis. <sup>2</sup> Seizures, ventricular haemorrhage and other neurological complications. <sup>3</sup> Most frequent reported conditions in this class were other respiratory problems (e.g. apnoea, meconium aspiration syndrome, pulmonary hypertension), gastrointestinal problems (eg, bleeding), minor jaundice.

Abbreviations: ET= exchange transfusion; LAMA= Left against medical advice; NICU=neonatal intensive care unit; RDS= respiratory distress syndrome; SCBU=semi-intensive care baby unit.

### Use of data

Data entered in the database were analysed at intervals of eight months and the results made available to the local coordinator. Findings of the database were presented and discussed in two large workshops with staff from De Soysa Hospital and from other large maternity units in Sri Lanka. Participants to these meetings included: senior obstetricians, neonatologists, postgraduate trainees and other middle level medical personnel, nurses, midwives and other staff. About 50 people participated to each workshop.

During these meetings, key indicators suggesting possible gaps in quality of care were identified, and recommendations for improvement were discussed and agreed upon (**Table 5**). Indicators identified as requiring actions to improve quality of care were: high rate of induction of labour (24.6%), of CS (30.0%) and episiotomy (56.1%); relatively high maternal near-miss cases (3.4%);

relatively high rate of preterm births (9.4%), low-birthweight rate (16.5%), stillbirth (0.97%), and of total deaths in newborns (1.98%). Recommendations developed focused on the key indicators identified and included the use of checklists to standardise case management, training, clinical audits, and more information for patients.

Smaller meetings of technical working groups were also organised, to develop and agree on specific tools and procedures to put in practice the recommendations agreed (such as: developing the information pamphlet on VBAC, and the checklists to review obstetric emergencies).

**Table 5. Use of data for improving quality of care**

| Key Indicators identified                                                                                                                                                                                                                                                                                                                                                                                                                                                                                                            | Agreed recommendations for quality improvement                                                                                                                                                                                                                                                                                                                                                                                                                                                                                                                                                                                                                                                                                                                                                                                                                                                                                                                                                                                                                                                                                                                                                                                                                                                                                                                                                                                        |
|--------------------------------------------------------------------------------------------------------------------------------------------------------------------------------------------------------------------------------------------------------------------------------------------------------------------------------------------------------------------------------------------------------------------------------------------------------------------------------------------------------------------------------------|---------------------------------------------------------------------------------------------------------------------------------------------------------------------------------------------------------------------------------------------------------------------------------------------------------------------------------------------------------------------------------------------------------------------------------------------------------------------------------------------------------------------------------------------------------------------------------------------------------------------------------------------------------------------------------------------------------------------------------------------------------------------------------------------------------------------------------------------------------------------------------------------------------------------------------------------------------------------------------------------------------------------------------------------------------------------------------------------------------------------------------------------------------------------------------------------------------------------------------------------------------------------------------------------------------------------------------------------------------------------------------------------------------------------------------------|
| <p><b>Maternal</b></p> <ul style="list-style-type: none"> <li>- High rate of induction of labour (24.6%), with many woman in Robson group 2a (nulliparous, single cephalic, at term, induced)</li> <li>- High rate of CS (30.0%), relatively high prevalence of group 5 (multiparous with previous CS)</li> <li>- Low rate of VBAC (17.1%)</li> <li>- High rate of episiotomy (56.1%)</li> <li>- Relatively high rate of near-miss cases</li> <li>- Low reported rate 3<sup>rd</sup>-4<sup>th</sup> degree perineal tears</li> </ul> | <ul style="list-style-type: none"> <li>• Checklist to be filled by the doctor in charge for each individual case of induction of labour, specifying indications, methods, timing. Data to be reviewed regularly. Consultant to make decision on IOL</li> <li>• Dedicated workshops on CS, discussing local data and international recommendations (16,17).</li> <li>• Training workshops to help improve the CTG interpretation skills. Stickers to help CTG interpretation. Improved communication regarding CTG interpretation from medical officers to Consultants using “WhatsApp/Viber”.</li> <li>• Training workshop to develop a consensus on how to manage foetal distress and poor progress of labour.</li> <li>• Establishment of a nurse-lead VBAC counselling clinic and development of a VBAC leaflet for patients. Education for staff, including community midwives, on methods of counselling.</li> <li>• Implementation of a selective episiotomy policy; training of midwives and medical staff on appropriate indication for episiotomy.</li> <li>• Doctors to identify clearly near-miss cases. Establishment of a system for regular internal review of near-miss cases.</li> <li>• Development of checklists for systematic analysis of obstetric emergencies against international standards of care.</li> <li>• Training of midwives on checking and reporting the perineum status after delivery.</li> </ul> |



|                                                                                                                                                                                                                                                                                                                               |                                                                                                                                                                                                                                                                                                                                                                                   |
|-------------------------------------------------------------------------------------------------------------------------------------------------------------------------------------------------------------------------------------------------------------------------------------------------------------------------------|-----------------------------------------------------------------------------------------------------------------------------------------------------------------------------------------------------------------------------------------------------------------------------------------------------------------------------------------------------------------------------------|
| <p><b>Newborn</b></p> <ul style="list-style-type: none"> <li>- High rate of preterm births (9.4%)</li> <li>- High rate of low birth weight (16.5%)</li> <li>- High rate of stillbirth (0.97%)</li> <li>- High rate of newborns with complications (12.2%)</li> <li>- High rate of total deaths in newborns (1.98%)</li> </ul> | <ul style="list-style-type: none"> <li>• Improve diffusion of national and international guidelines of antenatal care.</li> <li>• Improve prenatal ultrasound diagnosis of SGA and of malformation.</li> <li>• Development of checklist for systematic analysis of newborn care against international standards of care.</li> <li>• Training on newborn resuscitation.</li> </ul> |
|-------------------------------------------------------------------------------------------------------------------------------------------------------------------------------------------------------------------------------------------------------------------------------------------------------------------------------|-----------------------------------------------------------------------------------------------------------------------------------------------------------------------------------------------------------------------------------------------------------------------------------------------------------------------------------------------------------------------------------|

Abbreviations: CTG: cardiotocography; SGA: small for gestational age; VBAC: vaginal birth after cesarean section.

### Lessons learned

Results of this study were discussed among partners and lessons learned and future actions were articulated (**Box 2**). Overall the key lesson was that data collection was feasible, that it resulted in a large amount of data with an acceptable quality, and in the development of recommendations for quality improvement; however, use of data could be further improved. Drawing on this experience and on other experiences reported in literature (7,18-23), some concrete actions that may further help improving use of data in the future were discussed (**Box 2**). Although a simplified version of the Yellow Form was discussed, it was difficult to identify what variables to exclude: despite the data collection form including 150 variables, when findings were discussed clinicians tended to request even more additional information.

### Box 2. Lessons learned and way forward

#### *Key lessons*

1. Data collection was feasible and resulted in a large amount of data with an acceptable quality and in the development of some recommendations for quality Improvement (QI); however, use of data could be further improved.
2. Standard Operating procedures (SOP) and regular data monitoring and evaluation (M&E) was crucial.
3. One data collector was sufficient to collect data in the study setting, but one additional person was needed to ensure regular M&E.
4. Ensuring concrete use of data for QI should not be taken for granted and it requires building a system of coordination to facilitate data diffusion and discussion.
5. In general, clinicians without training or without a particular interest in QI methods, showed low interest in using statistical data for QI purposes, and were more attracted by new technologies. Appropriate involvement of staff (e.g. training, participation to projects, assignment of specific responsibilities), is needed to develop a local team who will act as drivers in QI.
6. It is difficult to find the golden balance between a “simple” data collection form (i.e. collecting few variables) and an “informative” data collection form that satisfies clinicians (i.e. collecting a large

number of variables).

### **Way forward**

1. The “Yellow Form” could be incorporated into the patient file; data collection could be made part of the duties of the hospital staff in charge of each single case. This should facilitate sustainability and may further improve quality of data.
2. All staff involved in data collections should be made aware of the standard case definitions.
3. Regular local M&E should be ensured to avoid drops in data quality.
4. Adding in the database functions of automatic reporting may probably increase local ownership and facilitate use of data.
5. Other forms of diffusing data, rather than workshops, may be explored, such as use of posters or newsletters.
6. With the number of recommendations increasing, the establishment of a technical group for QI within the hospital, with clear roles and responsibilities becomes mandatory to ensure their implementation.
7. To ensure translation into actions of recommendations arising from data discussion, a system for regular follow up should be put in place. This will probably be more effective if embedded in a national system for quality assurance in maternal and child health.

Abbreviations: M&E= monitoring and evaluation; QI= quality improvement; SOP= standard operating procedures.

## **DISCUSSION**

This is the first individual patient database established for comprehensive prospective data collection on births in Sri Lanka. From a review of existing literature, we could identify very few databases that prospectively collected a large number of individual patient variables on hospital births. Of these, most data collection systems were established in high-income countries, or in upper middle-income countries such as Brazil, Peru and South Africa (19-21). We could identify only two systems for prospective collection of individual maternal and newborn variables across the time of birth in low or low-middle income countries (22,23) and both collected data from a single facility (22-24). In respect to the average hospital administrative data, even in high income countries, the dataset implemented in this pilot study contains a large number of variables, such as maternal risk factors, that can be used for evaluating the case mix and for adjusting for confounders (7,21).

Most importantly, routine use of data to improve case management and organization of care is still not a common practice, even in countries with well-established data collection systems (7). Despite there being some good examples of how routine data collection systems are used to shape policies in low and middle-income countries (LMIC), for example in the paediatric field (25), these

1  
2  
3 are very limited in number. As such, the main value of this study is that it provides an example of  
4 how data can be used for discussing and agreeing on recommendations for improving the quality  
5 of care.  
6  
7

8  
9  
10 This study was aimed at reporting the feasibility of implementing an accurate system of data  
11 collection and is not at an extensive presentation of the database findings. Additional analyses  
12 (such as a detailed analysis of practices and outcomes related to CS according to the Robson  
13 Groups (26), and other multivariate and sub-group analyses) will be the object of future  
14 publications. Many of the findings of the descriptive analysis reported in this paper such as the rate  
15 of maternal deaths, induction of labour and low birth weight babies - are not surprising and are  
16 rather in line with other country reports (5,8-13,24,27-31). Results reflect the specificity of the  
17 setting: De Soysa Hospital is the largest referral maternity hospital in Sri Lanka, and case mix, as  
18 well as local practices, do not necessarily represent the average in the country. For example, the  
19 rate of induction of labour, CS and near-miss cases, although being relatively high when compared  
20 to other reports in international literature, are below the national reported average (12,13,27,30).  
21 Rate of stillbirth and newborn deaths after birth may appear high when compared to national  
22 statistics (the most recent national report provides a figure of stillbirth rate of 5.9/1000 (32)). This  
23 may be due to the case mix, with 55.7% of pregnancies at the De Soysa Hospital presenting at  
24 least one medical condition/risk factor for operative delivery/negative outcome. Additionally, about  
25 half of cases of stillbirth had a major malformation. Termination of pregnancy is legally allowed in  
26 Sri Lanka only to save the life of the mother, but not for any condition of foetal impairment, not  
27 even major malformations (33). The rate of postpartum haemorrhage appeared to be lower than  
28 what would be expected for LMIC according to international literature (34), leading us to double  
29 check this statistic in the hospital registers and found to be correct (Table 1). The low prevalence of  
30 DVT and PE may be due to the fact that these events are less frequent in the Asian population  
31 compared to others, or to under-reporting (35,36). It must be acknowledged that for most of the  
32 variables collected - such as risk factors, episiotomy, reasons for induction of labour/operative  
33 deliveries, newborn complications, etc, there is no other system of official data in the whole  
34 country. The main merit of the database was that it provided to hospital staff, for the first time in Sri  
35 Lanka, a large number of objective indicators on local practices and outcomes, thus providing an  
36 evidence base for discussing the appropriateness of the care delivered at the facility level.  
37 Although recommendations developed may not cover all actions needed to improve quality of care,  
38 they were agreed locally and as such represent an important step forward in the local culture of  
39 quality improvement and in the local ownership of the whole quality improvement process.  
40  
41  
42  
43  
44  
45  
46  
47  
48  
49  
50  
51  
52  
53  
54  
55  
56  
57

58  
59 In the future, the database will be used to analyse more specific topics, such as the  
60 appropriateness of hospital practises related to CS or to induction of labour (these analyses are

1  
2  
3 already ongoing, and will be reported in future publications). Findings of such analyses may inform  
4 the development of additional and more specific recommendations to improve quality of care.  
5 Additionally, the database may provide a way of monitoring trends over time regarding patients'  
6 characteristics, hospital practices (i.e., CS rates, and indications for CS) and health outcomes.  
7  
8  
9

10  
11 Given the paucity of efficient data collection systems in LMIC (6,7), lessons from this study may be  
12 of interest to other researchers and policy makers. However, in generalising the findings of this  
13 study to other settings, key characteristics of this project must be acknowledged. First, in this study  
14 dedicated staff was appointed for data collection and entry. Second, supervision was provided, and  
15 data collection was monitored regularly. Data collection that proved accurate under these  
16 conditions may fail to have good results if these minimum conditions are not guaranteed, especially  
17 if monitoring is not ensured.  
18  
19  
20  
21  
22  
23

24 The experience accumulated so far in this pilot experience may help scaling up the data collection  
25 system in other maternity units in the country. The Sustainable Development Goals (SDG) in  
26 countries with low baseline maternal mortality, such as Sri Lanka, include “achieving access to  
27 quality essential healthcare services” (37). Target-setting is accompanied by the need for  
28 improving measurement approaches and data quality to allow more accurate tracking of country  
29 progress as well as causes of death (38). The implementation of a system for individual patient  
30 data collection on hospital deliveries in other maternity units in Sri Lanka will allow comparison of  
31 several variables (patient characteristics, process outcomes and health outcomes) among different  
32 geographical regions, settings, over time. Data generated could be used to improve overall  
33 national practices. The data collection form utilised in this project was designed together with  
34 professionals from different maternity units in Sri Lanka, therefore, when extending it to other  
35 facilities, only minor adaptations may be required. However, scaling up will require a good  
36 mechanism for coordination, besides further testing to identify the optimal methods for data  
37 collection in other settings (such as smaller maternity units). Furthermore, it will be crucial to  
38 establish functional mechanisms (such as regular data audits) to ensure that information generated  
39 from the database are actually used in practice to improve quality of health care. As for many other  
40 types of data collection, the main problem may be that data are not actually utilised (7).  
41  
42  
43  
44  
45  
46  
47  
48  
49  
50  
51

52 Limitations of this study include that, within the project timelines, it was not possible to follow up the  
53 impact of the recommendations developed. Future longer-term studies will be needed to assess  
54 changes in key indicators over time. Although the study was carried out in a single-centre, it has  
55 the merit of reporting both technical feasibility related to the database implementation, quality of  
56 data (completeness and accuracy), lessons learned, and, actual use of data – the latter three being  
57 often neglected issues.  
58  
59  
60

## CONCLUSIONS

This pilot study on the implementation of an individual patient database on hospital deliveries in Sri Lanka proved that in this setting a large quantity of data could be collected accurately. The study is an example on how data can be used to discuss hospital practices, identify gaps in quality of care, and agree recommendations for improving the quality of hospital case management. More implementation research is needed to identify the best model for scaling up data collection to other maternity units in Sri Lanka and in other low-middle income countries. More research in general should report on the actual use of data, and should aim at identifying effective ways of translating recommendations generated from data into practice.

## Acknowledgments

We would like to thank all the hospitals staff who participated in the study. Our special thanks go to H K Dharmasiri, Medical Records Officer, De Soysa Hospital without whose steadfast support this project would not have been possible.

## Funding

This study was funded by a grant from the GREAT Network, Canadian Institutes of Health Research, St. Michael's Hospital, Toronto.

## Data sharing statement

All key data are provided in the paper. Additional details can be provided by the contact author upon request.

## Author contributions

ML, HS and MP conceived the study and procured funds

ML, HS, RM, NS, NG, MJ, RVG, and MP developed the data collections tools

AK, RF, AS and FRI collected data

BC, HW, CB and ML analysed the data

All authors interpreted data and contributed to the manuscript

ML wrote the first draft of the paper, all authors contributed to the final version of the paper

## REFERENCES

1. Tunçalp O, Were WM, MacLennan C, Oladapo OT, Gülmezoglu AM, Bahl R, Daelmans B, Mathai M, Say L, Kristensen F, Temmerman M, Bustreo F. Quality of care for pregnant women and newborns-the WHO vision. *BJOG*. 2015 Jul;122(8):1045-9.
2. World Health Organization. Standards for improving quality of maternal and newborn care in health facilities. Geneva: World Health Organization, 2016. Available at [http://www.who.int/maternal\\_child\\_adolescent/documents/improving-maternal-newborn-care-quality/en/](http://www.who.int/maternal_child_adolescent/documents/improving-maternal-newborn-care-quality/en/) (accessed March 13, 2018)
3. World Health Organization Strategies toward ending preventable maternal mortality (EPMM). Geneva: World Health Organization, 2015 Available at [http://who.int/reproductivehealth/topics/maternal\\_perinatal/epmm/en/](http://who.int/reproductivehealth/topics/maternal_perinatal/epmm/en/) (accessed March 13, 2018)
4. Graham WJ, Ahmed S, Stanton C, Abou-Zahr CL, Campbell OMR. Measuring maternal mortality: an overview of opportunities and options for developing countries. *BMC Medicine* 2008;6:12
5. Trends in maternal mortality 1990–2013. Geneva: World Health Organization; 2014 Available at [http://apps.who.int/iris/bitstream/10665/112682/2/9789241507226\\_eng.pdf?ua=1](http://apps.who.int/iris/bitstream/10665/112682/2/9789241507226_eng.pdf?ua=1), (accessed March 13, 2018)
6. Country health information systems: a review of the current situation and trends. Geneva: World Health Organization; 2011
7. Geary RS, Knight HE, Carroll FE, Gurol-Urganci I, Morris E, Cromwell DA, van der Meulen JH. A step-wise approach to developing indicators to compare the performance of maternity units using hospital administrative data. *BJOG*. 2017 Nov 6. doi: 10.1111/1471-0528.15013 .
8. The World Bank. Sri Lanka overview. Available at <http://www.worldbank.org/en/country/srilanka/overview> (accessed March 23, 2018)
9. Analyses of Maternal deaths 2015. Family Health Bureau Ministry of Health and Indigenous Medicine, Sri Lanka, Colombo 2014. Available at [http://fhb.health.gov.lk/web/index.php?option=com\\_phocadownload&view=category&id=40:maternal-child-morbidity-mortality-surveillance&Itemid=150&lang=en#](http://fhb.health.gov.lk/web/index.php?option=com_phocadownload&view=category&id=40:maternal-child-morbidity-mortality-surveillance&Itemid=150&lang=en#) (accessed March 25, 2018)



- 1  
2  
3  
4 10. Unicef Sri Lanka Statistics. Available at  
5 [https://www.unicef.org/infobycountry/sri\\_lanka\\_statistics.html#122](https://www.unicef.org/infobycountry/sri_lanka_statistics.html#122) (accessed March  
6 23, 2018)  
7
- 8  
9 11. Kapila Jayaratne. Maternal Death Surveillance and Response (MDSR) – outcomes  
10 of 2014. Available at  
11 [http://fhh.health.gov.lk/web/index.php?option=com\\_phocadownload&view=category](http://fhh.health.gov.lk/web/index.php?option=com_phocadownload&view=category&id=40:maternal-child-morbidity-mortality-surveillance&Itemid=150&lang=en#)  
12 [&id=40:maternal-child-morbidity-mortality-surveillance&Itemid=150&lang=en#](http://fhh.health.gov.lk/web/index.php?option=com_phocadownload&view=category&id=40:maternal-child-morbidity-mortality-surveillance&Itemid=150&lang=en#)  
13 (accessed March 25, 2018)  
14
- 15  
16 12. Goonewardene M, Kumara DMA, Jathun Arachchi DR, Vithanage R, Wijeweera R.  
17 The rising trend in caesarean section rates: should we and can we reduce it? Sri  
18 Lanka Journal of Obstetrics and Gynaecology 2012; 34: 11-18  
19
- 20  
21 13. Vogel JP, Souza JP, Gülmezoglu AM. Patterns and Outcomes of Induction of  
22 Labour in Africa and Asia: a secondary analysis of the WHO Global Survey on  
23 Maternal and Neonatal Health. PLoS One. 2013 Jun 3;8(6):e65612. doi:  
24 10.1371/journal.pone.0065612.  
25
- 26  
27 14. Epidata software. Available at <http://www.epidata.dk/> (accessed March 13, 2017)  
28
- 29  
30 15. World Health Organization 2011. Evaluating the quality of care for severe  
31 pregnancy complications: the WHO near-miss approach for maternal health.  
32 Geneva: World Health Organization, 2011.  
33
- 34  
35 16. Mahmud A, Morris E, Johnson S, Ismail KM. Developing core patient-reported  
36 outcomes in maternity: PRO-Maternity. BJOG. 2014 Sep;121 Suppl 4:15-9  
37
- 38  
39 17. Robson M, Hartigan L, Murphy M. Methods of achieving and maintaining an  
40 appropriate caesarean section rate. Best Pract Res Clin Obstet Gynaecol. 2013  
41 Apr;27(2):297-308.  
42
- 43  
44 18. Robson M, Murphy M, Byrne F. Quality assurance: The 10-Group Classification  
45 System (Robson classification), induction of labor, and cesarean delivery. Int J  
46 Gynaecol Obstet. 2015 Oct;131 Suppl 1:S23-7.  
47
- 48  
49 19. Allanson ER, Muller M, Pattinson RC. Causes of perinatal mortality and associated  
50 maternal complications in a South African province: challenges in predicting poor  
51 outcomes. BMC Pregnancy Childbirth. 2015 Feb 15;15:37. doi:10.1186/s12884-  
52 015-0472-9.  
53
- 54  
55 20. Jorge MH, Gotlieb SL, Soboll ML, de Almeida MF, Latorre Mdo R. [An information  
56 system on live births and the use of its data in epidemiology and health statistics].  
57 Rev Saude Publica. 1993 Dec;27 Suppl:1-44.  
58  
59  
60

- 1  
2  
3  
4 21. Statnikov Y, Ibrahim B, Modi N. A systematic review of administrative and clinical  
5 databases of infants admitted to neonatal units. *Arch Dis Child Fetal Neonatal Ed.*  
6 2017 May;102(3):F270-F276  
7
- 8 22. Seale AC, Barsosio HC, Koech AC, Berkley JA; KIPMAT group. Embedding  
9 surveillance into clinical care to detect serious adverse events in pregnancy.  
10 *Vaccine.* 2015 Nov 25;33(47):6466-8.  
11
- 12 23. Bergsjø P, Mlay J, Lie RT, Lie-Nielsen E, Shao JF. A medical birth registry at  
13 Kilimanjaro Christian Medical Centre. *East Afr J Public Health.* 2007 Apr;4(1):1-4.  
14
- 15 24. Sørbye IK, Vangen S, Oneko O, Sundby J, Bergsjø P. Caesarean section among  
16 referred and self-referred birthing women: a cohort study from a tertiary hospital,  
17 northeastern Tanzania. *BMC Pregnancy Childbirth.* 2011 Jul 28;11:55.  
18
- 19 25. PNG National Department of Health and Paediatric Society of PNG. Papua New  
20 Guinea Child Health Policy and Plan 2009 - 2020 (Updated 2015). Port Moresby,  
21 Papua New Guinea. 2015  
22
- 23 26. World Health Organization. Robson Classification: Implementation Manual. World  
24 Health Organization, Geneva 2017  
25
- 26 27. Senanayake H, Dias T, Jayawardena A. Maternal mortality and morbidity:  
27 epidemiology of intensive care admissions in pregnancy. *Best Pract Res Clin*  
28 *Obstet Gynaecol.* 2013 Dec;27(6):811-20.  
29
- 30 28. Jayaratne,K.; Agampodi,S.; Jayathilake,A.; Prerera,D. Moving beyond maternal  
31 deaths: Maternal near-miss es in Sri Lanka. *BJOG: Conference: RCOG World*  
32 *Congress 2015.* Brisbane, QLD Australia. Conference Start: 20150412. Conference  
33 End: 20150415. Conference Publication: (var.pagings). 122  
34
- 35 29. Tunçalp O, Hindin MJ, Souza JP, Chou D, Say L. The prevalence of maternal near-  
36 miss : a systematic review. *BJOG.* 2012 May;119(6):653-61. doi:10.1111/j.1471-  
37 0528.2012.03294.x. Review. PubMed PMID: 22489760.  
38
- 39 30. Lawn JE, Blencowe H, Waiswa P, Amouzou A, Mathers C, Hogan D, Flenady V,  
40 Frøen JF, Qureshi ZU, Calderwood C, Shiekh S, Jassir FB, You D, McClure EM,  
41 Mathai M,Cousens S; Lancet Ending Preventable Stillbirths Series study group;  
42 Lancet Stillbirth Epidemiology investigator group. Stillbirths: rates, risk factors, and  
43 acceleration towards 2030. *Lancet.* 2016 Feb 6;387(10018):587-603.  
44
- 45 31. Vogel JP, Betrán AP, Vindevoghel N, Souza JP, Torloni MR, Zhang J, Tunçalp Ö,  
46 Mori R, Morisaki N, Ortiz-Panozo E, Hernandez B, Pérez-Cuevas R, Qureshi Z,  
47 Gülmezoglu AM, Temmerman M; WHO Multi-Country Survey on Maternal and  
48 Newborn, Health Research Network. Use of the Robson classification to assess  
49  
50  
51  
52  
53  
54  
55  
56  
57  
58  
59  
60



- 1  
2  
3 caesarean section trends in 21 countries: a secondary analysis of two WHO  
4 multicountry surveys. *Lancet Glob Health*. 2015 May;3(5):e260-70.
- 5  
6  
7 32. Maternal & Child Morbidity, Mortality Surveillance. Family Health Bureau Ministry of  
8 Health and Indigenous Medicine, Sri Lanka, Colombo 2014. Available at  
9 [http://fhb.health.gov.lk/web/index.php?option=com\\_phocadownload&view=category](http://fhb.health.gov.lk/web/index.php?option=com_phocadownload&view=category&id=40:maternal-child-morbidity-mortality-surveillance&Itemid=150&lang=en#)  
10 [&id=40:maternal-child-morbidity-mortality-surveillance&Itemid=150&lang=en#](http://fhb.health.gov.lk/web/index.php?option=com_phocadownload&view=category&id=40:maternal-child-morbidity-mortality-surveillance&Itemid=150&lang=en#)  
11 (accessed March 25, 2018)
- 12  
13  
14 33. United Nations. Abortion policy, a global review. Available at  
15 <http://www.un.org/esa/population/publications/abortion/profiles.htm> (accessed  
16 March 25, 2018)
- 17  
18  
19 34. World Health Organization. WHO recommendations for the prevention and  
20 treatment of postpartum haemorrhage. World Health Organization, Geneva 2012.  
21 Available at  
22 [http://apps.who.int/iris/bitstream/handle/10665/75411/9789241548502\\_eng.pdf?seq](http://apps.who.int/iris/bitstream/handle/10665/75411/9789241548502_eng.pdf?sequence=1)  
23 [uence=1](http://apps.who.int/iris/bitstream/handle/10665/75411/9789241548502_eng.pdf?sequence=1) (accessed on April 10, 2018)
- 24  
25  
26 35. Sheriffdeen AH, Wijeyaratne M. Deep vein thrombosis in Sri Lankans--time to  
27 take notice. *Ceylon Med J*. 2001 Mar;46(1):3-5
- 28  
29  
30 36. Al-Ani F, Teng Y, Iansavichene A, Lazo-Langner A. Evaluating the Effect of  
31 Ethnicity on the Risk of Venous Thromboembolism (VTE): A Systematic Review.  
32 *Blood* 2015 126:4714.
- 33  
34  
35 37. Senanayake H, Goonewardene M, Ranatunga A, Hattotuwa R, Amarasekera S,  
36 Amarasinghe I. Achieving Millennium Development Goals 4 and 5 in Sri Lanka.  
37 *BJOG* 2011;118 (Suppl. 2):78–87
- 38  
39  
40 38. United Nations. General assembly. Transforming our world: the 2030 Agenda for  
41 Sustainable Development General Assembly, 25 Se September 2015. Available at  
42 [http://www.un.org/ga/search/view\\_doc.asp?symbol=A/RES/70/1&Lang=E](http://www.un.org/ga/search/view_doc.asp?symbol=A/RES/70/1&Lang=E)  
43 (accessed March 13, 2017)
- 44  
45  
46  
47  
48  
49  
50  
51  
52  
53  
54  
55  
56  
57  
58  
59  
60

1 Supplementary files

2  
3 **Implementation of an individual-patient prospective**  
4  
5  
6 **database of hospital births in Sri Lanka and its use for**  
7  
8  
9 **improving quality of care**  
10  
11  
12  
13  
14  
15

16 List of files

17  
18  
19 **Appendix 1. Yellow Form** **Page 2**

20  
21 **Appendix 2. Missing variables** **Page 5**  
22  
23  
24  
25  
26  
27  
28  
29  
30  
31  
32  
33  
34  
35  
36  
37  
38  
39  
40  
41  
42  
43  
44  
45  
46  
47  
48  
49  
50  
51  
52  
53  
54  
55  
56  
57  
58  
59  
60

# Appendix 1. YELLOW FORM

Complete this chart AT DELIVERY (white part) and AT DISCHARGE (dotted part)  Soya  Other

If other hosp, add name: \_\_\_\_\_

Adm (dd/mm/yy)  Deliv  Disch  BHT 15-

Age (years)  Education  No schooling  Primary (Grades 1-6)  Secondary (Grades 6-10)  Higher  
 Working status  No data  Working  Housewife Marital status  Married  Unmarried  Unmarried living together

GA at delivery (wks/days)  GA estimated with US  N  Y  Missing

Gravida (pregnancies)<sup>1</sup>  Para<sup>1</sup>  Born alive<sup>1</sup>  (<sup>1</sup> For para / born alive – exclude current pregnancy)

BMI at booking  Underweight (< 18.4)  Normal (18.5 - 22.9)  Overweight (23 - 27.4)  Obese (> 27.5)

**(Risk factors at time of delivery-check all)<sup>2</sup>**

- Multiple pregn  N  Y PreGes Hyperten<sup>3</sup>  N  Y Ges Hyperten<sup>3</sup> no proteinur  N  Y
- Pre-ecl NOT SEV  N  Y Pre-ecl SEV  N  Y Eclampsia  N  Y
- Chorioamnionitis  N  Y Major fetal malformation/s  N  Y IUGR/SGA<sup>4</sup>  N  Y
- Pregeste Diab  N  Y GDM in diet  N  Y GDM, in drug therapy  N  Y
- Maternal-cardiac disease<sup>2</sup>  N  Y Maternal hypothyroidism  N  Y Polihydramnios  N  Y
- Oligidramnion  N  Y APH/major plac previa/accret  N  Y Severe Anaemia (Hb<7)  N  Y
- Other  N  Y

If Other maternal conditions, specify \_\_\_\_\_

If Other fetal conditions, specify \_\_\_\_\_

If Other, specify \_\_\_\_\_

**One tick only**

- Steroids<sup>5</sup>  N  complete  incomplete  dose unclear
- Previous CS  N  Y  Missing Number \_\_\_\_\_
- If prev CS, trial of labour  No previous CS  N  Y
- Presentation  Cephalic  Breech  Other  Missing
- Labour onset  Spont  Induc (even if failed)  PreLabCS<sup>6</sup>  Missing
- Delivery mode  Vag spont  Vag forcep/ventuse  CS  Missing
- If CS, type  No CS  Emerg  Elect  Missing

**If IOL, main indication given (one tick only)**

- 1 No IOL  2 Post-term  3 Prelab rupture memb  4 Diabetes on diet
- 5 Diabet on insulin/metform  6 Macrosomy at US<sup>7</sup>  7 IUGR/SGA<sup>4</sup>  8 Multiple pregnancies
- 9 Maternal Age > 40 y  10 Hypert/Pre ecl/Eclam  11 Cardiac disease  12 Oligoidramn
- 13 Other add \_\_\_\_\_  14 Prolonged latent phase/ painful contractions not in labour  0 Missing

**If IOL, mode of induction (one tick only)<sup>8</sup>**

- 1 No IOL  2 PGE  3 Oxytocin  4 Foley
- 5 ARM  6 PGE+ oxytocin ± ARM  7 Foley+ARM/oxytocin  8 Foley + PGE
- 9 ARM + oxytocin  10 Other add: \_\_\_\_\_  0 Missing

**If operative delivery, main indication (one tick only)**

- 1 No operative del  2 CTG anom/suspected fetal distress  3 Failed induction
- 4 Distocya 1st  5 Distocya 2nd stage<sup>10</sup>  6 Past CS
- 7 Breech/abnormal lie  8 History of subfertility  9 APH/major placenta previa
- 10 Cardiac disease  11 Prelab diagn CPD/short mother  12 Multiple pregnancies
- 13 IUGR  14 Pre term  15 Diab
- 16 Hypert/Pre ecl/Eclam  17 Maternal request  18 Other
- 0 Missing

If other fetal cause specify \_\_\_\_\_

If other maternal specify \_\_\_\_\_

If other cause \_\_\_\_\_

- Episiotomy  N  Y  Missing
- Analges in labour<sup>9</sup>  N  Petidine  Epid  Spin  Mix  Other
- If CS, anaesthesia  No CS  Spinal/epid  General
- 3<sup>rd</sup> Stage manag  Active  No active  Missing
- Removal placenta  Spont  Manual  ERPC  Missing
- Operator del  Nurse  MW  HO  SHO  Reg  Con  Missing

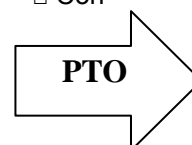

**Complications (one tick)**

|                             |                                   |                                |                                     |                                                       |
|-----------------------------|-----------------------------------|--------------------------------|-------------------------------------|-------------------------------------------------------|
| <b>Perineal tears</b>       | <input type="checkbox"/> N/I-II d | <input type="checkbox"/> III d | <input type="checkbox"/> IV d       | <input type="checkbox"/> Missing                      |
| <b>PPH<sup>11</sup></b>     | <input type="checkbox"/> N        | <input type="checkbox"/> Minor | <input type="checkbox"/> Severe     | <input type="checkbox"/> Massive                      |
| <b>Blood transfusion</b>    | <input type="checkbox"/> N        | <input type="checkbox"/> Y     | <b>Units (#)</b>                    | _____                                                 |
| <b>Cord prolapse</b>        | <input type="checkbox"/> N        | <input type="checkbox"/> Y     | <b>Abruptio placentae</b>           | <input type="checkbox"/> N <input type="checkbox"/> Y |
| <b>Uterine rupture</b>      | <input type="checkbox"/> N        | <input type="checkbox"/> Y     | <b>Amn fluid embol</b>              | <input type="checkbox"/> N <input type="checkbox"/> Y |
| <b>Admission to ICU/HDO</b> | <input type="checkbox"/> N        | <input type="checkbox"/> Y     | <b>Major organ dys<sup>12</sup></b> | <input type="checkbox"/> N <input type="checkbox"/> Y |
| <b>OT after deliv</b>       | <input type="checkbox"/> N        | <input type="checkbox"/> Y     | <b>Hysterectomy</b>                 | <input type="checkbox"/> N <input type="checkbox"/> Y |
| <b>Sepsis/sev infect</b>    | <input type="checkbox"/> N        | <input type="checkbox"/> Y     | <b>DVT/PE</b>                       | <input type="checkbox"/> N <input type="checkbox"/> Y |
| <b>Other Complications</b>  | <input type="checkbox"/> N        | <input type="checkbox"/> Y     | <b>Other infections</b>             | <input type="checkbox"/> N <input type="checkbox"/> Y |

**Final outcome (one tick)**

Discharged  Disc with disab due to preg complic<sup>13</sup>  Death  Referred  LAMA

**Near Miss<sup>14</sup>**  N  Y

**If NM or death, cause (select main; if more than one, write in Notes)**

- |                                                    |                                                         |                                    |
|----------------------------------------------------|---------------------------------------------------------|------------------------------------|
| <input type="checkbox"/> 1 Pre-exist cardiac dis   | <input type="checkbox"/> 2 Other pre-existing medic con | <input type="checkbox"/> 3 Suicide |
| <input type="checkbox"/> 4 Hypertension            | <input type="checkbox"/> 5 Preeclampsia/Eclampsia       | <input type="checkbox"/> 6 PPH     |
| <input type="checkbox"/> 7 Amniotic fluid embolism | <input type="checkbox"/> 8 Sepsis/infection             | <input type="checkbox"/> 9 DVT/PE  |
| <input type="checkbox"/> 10 Complic anaesthesia    | <input type="checkbox"/> 11 Other                       | <input type="checkbox"/> 0 Missing |

If Others specify \_\_\_\_\_

Notes \_\_\_\_\_

**Post delivery duration stay (days)<sup>15</sup>**

If stay >24 h, reason  maternal  newborn  both  hospital regulations  Missing

-----NEWBORN (N1)-----

**Born**  Alive<sup>1</sup>  Dead<sup>2</sup> **If stillbirth<sup>3</sup>**  noSB  Macerated  Fresh  Intrapartum  Missing

**Sex**  Female  Male  Missing **BW (gr)<sup>4</sup>**  **Apgar1/5 /10** //

**Ventilated in delivery room<sup>5</sup>**  N  Y  Missing **Asphyxia<sup>6</sup>**  N  Y  Missing

**Postdelivery**  With mother  SCBU  NICU  Referred  Obitorio  Missing

**Reason for referral**  medical complication  surgical complication  No beds  Other  Missing

If baby in NICU /SCBU, add here BHT code

**COMPLICATIONS**

**RDS<sup>7</sup>**  N  Y **Jaundice with ET**  N  Y **Sepsis**  N  Y

**Other Infect (incl NEC)**  N  Y **Major birth trauma<sup>8</sup>**  N  Y **Major malformation<sup>9</sup>**  N  Y

**Neurol (seizure, IVH, HIE)**  N  Y **Phototherapy > 24 h**  N  Y **Other**  N  Y

If other, add \_\_\_\_\_

**Final**  Discharged  Disc with disabilities  Death  Referred  LAMA

-----NEWBORN (N2 if twins)-----

**Born**  Alive<sup>1</sup>  Dead<sup>2</sup> **If stillbirth<sup>3</sup>**  noSB  Macerated  Fresh  Intrapartum  Missing

**Sex**  Female  Male  Missing **BW (gr)<sup>4</sup>**  **Apgar1/5 /10** //

**Ventilated in delivery room<sup>5</sup>**  N  Y  Missing **Asphyxia<sup>6</sup>**  N  Y  Missing

**Postdelivery**  With mother  SCBU  NICU  Referred  Obitorio  Missing

**Reason for referral**  medical complication  surgical complication  No beds  Other  Missing

If baby in NICU /SCBU, add here BHT code

**COMPLICATIONS**

**RDS<sup>7</sup>**  N  Y **Jaundice with ET**  N  Y **Sepsis**  N  Y

**Other Infect (incl NEC)**  N  Y **Major birth trauma<sup>8</sup>**  N  Y **Major malformation<sup>9</sup>**  N  Y

**Neurol (seizure, IVH, HIE)**  N  Y **Phototherapy > 24 h**  N  Y **Other**  N  Y

If other, add \_\_\_\_\_

**Final**  Discharged  Disc with disabilities  Death  Referred  LAMA

**\*DEFINITIONS (WOMAN)**

- <sup>1</sup> **Gravida /Para/ Born alive:** fill this excluding current pregnancy/delivery (example: 3 pregnancies, 2 children, 1 stillbirth will be gravida 3, para 2, born alive 1)
- <sup>2</sup> **Risk factors at time of delivery:** consider here the risk factors present at time of delivery and that can affect the delivery outcome. Examples:
- If the mother had severe anaemia but this was corrected before delivery, do not tick the severe anaemia box).
  - If the mother had hypertension, pre-eclampsia, eclampsia, or hypothyroidism during current pregnancy, still tick the box even if the situation is under control
  - If relevant cardiac problems present or even in the past, still tick the box.
- <sup>3</sup> **Hypertension:** this is defined with a BP > 140/90
- <sup>4</sup> **IUGR/SGA:** defined as weight < 10 centile of estimated weight-for-GA or < 10 centile for abdominal circumference (Bangladesh growth chart). IUGR/SGA is based on US estimate (if there was an indication for US, such as clinical signs suggesting IUGR, but US was not performed or uncertain, collect this information under "other or uncertain".
- <sup>5</sup> **Steroids:** Complete dose is Dexametason 8 mg /12 hrs for 3 doses –can you double if this is your national standard ? (last GL 6mg/ 12 h 48 h)
- <sup>6</sup> **Induction:** as labour onset should be selected even in the case of **failed IOL** and subsequent CS, not "prelabour caesarean section" (note that this is accordingly to Robson classification)
- <sup>7</sup> **Macrosomy at US:** defined as weight > 3500 grams or 90 Centile weight-for-GA
- <sup>8</sup> **If IOL, mode of induction:** record here only procedures for IOL, i.e. until 4 cm dilatation
- <sup>9</sup> **Analg:** record only drugs actually given (not just prescribed). Record paracetamol under "other"
- <sup>10</sup> **Distocya 2nd stage:** CS at full dilatation
- <sup>11</sup> **PPH Minor** (not severe not massive) Severe PPH ( $\geq 1000$  ml or any bleeding with hypotension or tachycardia or blood transfusion) Massive (lost of  $\geq 40\%$  of blood volume, blood volume= body weight(kg)/12)
- <sup>12</sup> **Major organ dysfunction:** as for Near miss definition -do not consider diabetes as major organ dysfunction (see following ANNEX 1)
- <sup>13</sup> **Disabilities from pregnancy complications:** include here stroke, anaemia, post partum depression or other psychiatric disorders and other disabilities (not include preexisting problems such as GDM, hypertension, or hysterectomy)
- <sup>14</sup> **Near Miss=** A maternal near-miss case is defined as "a woman who nearly died but survived a complication that occurred during pregnancy, childbirth or within 42 days of termination of pregnancy" (*WHO 2011*). This implies either severe disease (severe PPH, severe pre-eclampsia, Eclampsia, sepsis, uterine rupture, severe complications of abortion), or critical interventions (admission UTI, intervention radiology, lapartotomy, blood transfusion) or organ dysfunction (see ANNEX 1)
- <sup>15</sup> **Post delivery duration stay:** count this in days. If admitted on 2 April and out day 3 April count this as 1 day if it is less than 24 h. If more than 24h, count this as 2 days

**DEFINITIONS (NEWBORN)**

- <sup>1</sup> **Born alive=** fetus/baby of any GA and any birth weight showing any sign of vital activity (breath, cardiac, movements)
- <sup>2</sup> **Born dead=** when not born alive; it includes stillbirth
- <sup>3</sup> **Stillbirth =** macerated are fresh are based on clinical evaluation; intrapartum is a fetus where heart rate was perceived before delivery (and than lost after delivery)
- <sup>4</sup> **Birth weight=** avoid approximation (use weight in grams)
- <sup>5</sup> **Ventilated in delivery room=** not just stimulated, but ventilated (with bag or CPAP) for more than *10 seconds*
- <sup>6</sup> **Asphyxia=** no spontaneous start of breathing, ventilation for at least *30 sec* and/or thoracic compressions as in international guidelines or any drug
- <sup>7</sup> **RDS (Respiratory Distress Syndrome)=** tick this box for a baby with respiratory distress lasting more than 24 hours
- <sup>8</sup> **Major birth trauma=** include here brachial plexus injury/arm palsy, fractures at any site, sub-aponeurotic (subgaleal) hemorrhage. Do NOT include here cephaloematoma and caput succedaneum
- <sup>9</sup> **Major Malformation=** do not include here minor malformation such as skin tags and pits, syndactyly, polydactyly, additional finger, PDA even if persistent.
- <sup>10</sup> **Day of death=** for still birth use day zero

<sup>12</sup> **ANNEX 1 DEFINITIONS ORGAN DYSFUNCTION (SOURCE: WHO MANUAL)****Organ dysfunction / life-threatening conditions**

- C0 Cardiovascular dysfunction**  
[shock, use of continuous vasoactive drugs, cardiac arrest, cardio-pulmonary resuscitation, severe hypoperfusion (lactate  $>5$  mmol/L or  $>45$ mg/dL) or severe acidosis (pH $<7.1$ )]
- C1 Respiratory dysfunction**  
[acute cyanosis, gasping, severe tachypnea (respiratory rate $>40$  bpm), severe bradypnea (respiratory rate $<6$  bpm), severe hypoxemia (PAO<sub>2</sub>/FiO<sub>2</sub> $<200$  O<sub>2</sub> saturation  $<90\%$  for  $\geq 60$ min) or intubation and ventilation not related to anaesthesia]
- C2 Renal dysfunction**  
[oliguria non responsive to fluids or diuretics, dialysis for acute renal failure or severe acute azotemia (creatinine  $\geq 300$ umol/ml or  $\geq 3.5$ mg/dL)]
- C3 Coagulation/hematologic dysfunction**  
[failure to form clots, massive transfusion of blood or red cells ( $\geq 5$  units) or severe acute thrombocytopenia ( $<50,000$  platelets/ml)]
- C4 Hepatic dysfunction**  
[jaundice in the presence of pre-eclampsia, severe acute hyperbilirubinemia (bilirubin $>100$ umol/L or  $>6.0$ mg/dL)]
- C5 Neurologic dysfunction**  
[prolonged unconsciousness / coma (lasting  $>12$  hours), stroke, status epilepticus / uncontrollable fits, total paralysis]
- C6 Uterine dysfunction / Hysterectomy**  
[haemorrhage or infection leading to hysterectomy]

## Appendix 2. Missing variables

|                                               | Total | Missing | % Missing |
|-----------------------------------------------|-------|---------|-----------|
| <b>Maternal variables</b>                     |       |         |           |
| Age                                           | 7504  | 34      | 0.4       |
| Work                                          | 7504  | 38      | 0.5       |
| Education                                     | 7504  | 37      | 0.4       |
| Para (number of children)                     | 7504  | 34      | 0.4       |
| Marital status                                | 7504  | 38      | 0.5       |
| Gravidas (pregnancies, including the ongoing) | 7504  | 34      | 0.4       |
| Born alive                                    | 7504  | 34      | 0.4       |
| Gestational age at delivery                   | 7504  | 47      | 0.6       |
| Gestational age estimated with ultrasounds    | 7504  | 53      | 0.7       |
| BMI                                           | 7504  | 53      | 0.7       |
| Discharge                                     | 7504  | 35      | 0.4       |
| Delivery                                      | 7504  | 32      | 0.4       |
| Multiple pregnancies                          | 7504  | 34      | 0.4       |
| Pregestetional hypertension                   | 7504  | 33      | 0.4       |
| Gestetional hypertension (no proteinuria)     | 7504  | 35      | 0.4       |
| Pre-eclampsia not severe                      | 7504  | 35      | 0.4       |
| Pre-eclampsia severe                          | 7504  | 35      | 0.4       |
| Eclampsia                                     | 7504  | 34      | 0.4       |
| Chorionamnionitis                             | 7504  | 36      | 0.4       |
| Major fetal malformation                      | 7504  | 36      | 0.4       |
| IUGR/SGA                                      | 7504  | 36      | 0.4       |
| Pregestetional diabetes                       | 7504  | 35      | 0.4       |
| Gestetional diabetes mellitus in diet         | 7504  | 35      | 0.4       |
| Gestetional diabetes mellitus in drug therapy | 7504  | 36      | 0.4       |
| Maternal cardiac disease                      | 7504  | 34      | 0.4       |
| Maternal hypothyroidism                       | 7504  | 37      | 0.4       |
| Polihydramnios                                | 7504  | 36      | 0.4       |
| Oligohydramnios                               | 7504  | 38      | 0.4       |
| APH/major placentia previa                    | 7504  | 37      | 0.4       |
| Severe anaemia                                | 7504  | 38      | 0.5       |
| Other (risk factors)                          | 7504  | 63      | 0.8       |
| Steroids                                      | 7504  | 37      | 0.4       |



|    |                                   |      |    |     |
|----|-----------------------------------|------|----|-----|
| 1  | Previous CS                       | 7504 | 38 | 0.5 |
| 2  | If previous CS, trial of labour   | 7504 | 39 | 0.4 |
| 3  |                                   |      |    |     |
| 4  | Presentation                      | 7504 | 37 | 0.4 |
| 5  |                                   |      |    |     |
| 6  | Labour onset                      | 7504 | 36 | 0.4 |
| 7  |                                   |      |    |     |
| 8  | Delivery mode                     | 7504 | 37 | 0.4 |
| 9  |                                   |      |    |     |
| 10 | If CS, type                       | 7504 | 37 | 0.4 |
| 11 |                                   |      |    |     |
| 12 | Indication of labour              | 7504 | 36 | 0.4 |
| 13 |                                   |      |    |     |
| 14 | Mode of induction                 | 7504 | 42 | 0.5 |
| 15 |                                   |      |    |     |
| 16 | If operative delivery, indication | 7504 | 38 | 0.5 |
| 17 |                                   |      |    |     |
| 18 | Episiotomy                        | 7504 | 43 | 0.5 |
| 19 |                                   |      |    |     |
| 20 | Analgesia in labour               | 7504 | 43 | 0.5 |
| 21 |                                   |      |    |     |
| 22 | 3 <sup>rd</sup> stage management  | 7504 | 39 | 0.5 |
| 23 |                                   |      |    |     |
| 24 | Removal of placenta               | 7504 | 39 | 0.5 |
| 25 |                                   |      |    |     |
| 26 | Operator delivery                 | 7504 | 41 | 0.5 |
| 27 |                                   |      |    |     |
| 28 | Perineal tears                    | 7504 | 36 | 0.4 |
| 29 |                                   |      |    |     |
| 30 | PPH                               | 7504 | 38 | 0.5 |
| 31 |                                   |      |    |     |
| 32 | Blood transfusion                 | 7504 | 36 | 0.4 |
| 33 |                                   |      |    |     |
| 34 | Cord collapse                     | 7504 | 42 | 0.5 |
| 35 |                                   |      |    |     |
| 36 | Uterine rupture                   | 7504 | 42 | 0.5 |
| 37 |                                   |      |    |     |
| 38 | Admission to ICU                  | 7504 | 22 | 0.2 |
| 39 |                                   |      |    |     |
| 40 | OT after delivery                 | 7504 | 43 | 0.5 |
| 41 |                                   |      |    |     |
| 42 | Sepsis/several infections         | 7504 | 44 | 0.5 |
| 43 |                                   |      |    |     |
| 44 | Other complications               | 7504 | 45 | 0.6 |
| 45 |                                   |      |    |     |
| 46 | Abruption placentae               | 7504 | 42 | 0.5 |
| 47 |                                   |      |    |     |
| 48 | Amniotic fluid embolism           | 7504 | 42 | 0.5 |
| 49 |                                   |      |    |     |
| 50 | Major organ dysfunction           | 7504 | 37 | 0.4 |
| 51 |                                   |      |    |     |
| 52 | Hysterectomy                      | 7504 | 36 | 0.4 |
| 53 |                                   |      |    |     |
| 54 | DVT                               | 7504 | 46 | 0.6 |
| 55 |                                   |      |    |     |
| 56 | Final outcome                     | 7504 | 42 | 0.5 |
| 57 |                                   |      |    |     |
| 58 | Near miss                         | 7504 | 20 | 0.2 |
| 59 |                                   |      |    |     |
| 60 | <b>Newborn variables †</b>        |      |    |     |
|    | Born                              | 7504 | 43 | 0.5 |
|    | If stillbirth, fresh or macerated | 7504 | 75 | 1.0 |

|                                                |      |     |     |
|------------------------------------------------|------|-----|-----|
| Sex                                            | 7504 | 51  | 0.6 |
| Birth weight                                   | 7504 | 68  | 0.9 |
| Apgar at 1'                                    | 7504 | 168 | 2.2 |
| Apgar at 5'                                    | 7504 | 168 | 2.2 |
| Apgar at 10'                                   | 7504 | 166 | 2.2 |
| Ventilated in delivery room                    | 7504 | 119 | 1.5 |
| Asphyxia                                       | 7504 | 124 | 1.6 |
| Post-delivery                                  | 7504 | 44  | 0.5 |
| Respiratory distress syndrome                  | 7504 | 114 | 1.5 |
| Other infections                               | 7504 | 110 | 1.4 |
| Neurological complications (seizure, IVH, HIE) | 7504 | 114 | 1.5 |
| Jaundice with ET                               | 7504 | 112 | 1.4 |
| Major birth trauma                             | 7504 | 120 | 1.6 |
| Phototherapy for over 24 hours                 | 7504 | 121 | 1.6 |
| Sepsis                                         | 7504 | 113 | 1.5 |
| Major malformation                             | 7504 | 120 | 1.6 |
| Other complications                            | 7504 | 172 | 2.3 |
| Final                                          | 7504 | 108 | 1.4 |

Abbreviations: APH= ante-partum haemorrhage; BMI= body Mass index; CS= caesarian section; DVT= deep vein thrombosis; ET= exchange transfusion; HIE= Hypoxic Ischemic Encephalopathy; ICU= Intensive care unit; IUGR=Intra-uterine growth restriction; IVH= intra-ventricular haemorrhage; OT=operating theatre; PPH= post-partum haemorrhage; SGA= small for gestational age.

<sup>†</sup> For multiple pregnancies, only data on the first newborn provided
