# Supplementary material for: Implementation of an individual patient prospective database of hospital births in Sri Lanka and its use for improving quality of care
Source: PubMed Central journal article supplement — BMJ Open. 2019 Feb 3;9(2):e023706. doi: 10.1136/bmjopen-2018-023706 (PMC6368149; doi:10.1136/bmjopen-2018-023706), 2019-02-03
Supplement: bmjopen-2018-023706supp001.pdf [file bmjopen-2018-023706supp001.pdf]

Supplementary files

**Implementation of an individual-patient prospective database of hospital births in Sri Lanka and its use for improving quality of care**

List of files

Appendix 1. Yellow Form

Page 2

Appendix 2. Missing variables

Page 5

# Appendix 1. YELLOW FORM

Complete this chart AT DELIVERY (white part) and AT DISCHARGE (dotted part)  Soysa  Other

If other hosp, add name: \_\_\_\_\_

Adm (dd/mm/yy)  Deliv  Disch  BHT 15-

Age (years)  Education  No schooling  Primary (Grades 1-6)  Secondary (Grades 6-10)  Higher  
 Working status  No data  Working  Housewife Marital status  Married  Unmarried  Unmarried living together

GA at delivery (wks/days) / GA estimated with US  N  Y  Missing  
 Gravida (pregnancies)<sup>1</sup>  Para<sup>1</sup>  Born alive<sup>1</sup>  (<sup>1</sup> For para / born alive – exclude current pregnancy)  
 BMI at booking  Underweight (< 18.4)  Normal (18.5 - 22.9)  Overweight (23 - 27.4)  Obese (> 27.5)

**(Risk factors at time of delivery-check all)<sup>2</sup>**

|                                       |                                                       |                              |                                                       |                                        |                                                       |
|---------------------------------------|-------------------------------------------------------|------------------------------|-------------------------------------------------------|----------------------------------------|-------------------------------------------------------|
| Multiple pregn                        | <input type="checkbox"/> N <input type="checkbox"/> Y | PreGes Hyperten <sup>3</sup> | <input type="checkbox"/> N <input type="checkbox"/> Y | Ges Hyperten <sup>3</sup> no proteinur | <input type="checkbox"/> N <input type="checkbox"/> Y |
| Pre-ecl NOT SEV                       | <input type="checkbox"/> N <input type="checkbox"/> Y | Pre-ecl SEV                  | <input type="checkbox"/> N <input type="checkbox"/> Y | Eclampsia                              | <input type="checkbox"/> N <input type="checkbox"/> Y |
| Chorioamnionitis                      | <input type="checkbox"/> N <input type="checkbox"/> Y | Major fetal malformation/s   | <input type="checkbox"/> N <input type="checkbox"/> Y | IUGR/SGA <sup>4</sup>                  | <input type="checkbox"/> N <input type="checkbox"/> Y |
| Pregeste Diab                         | <input type="checkbox"/> N <input type="checkbox"/> Y | GDM in diet                  | <input type="checkbox"/> N <input type="checkbox"/> Y | GDM, in drug therapy                   | <input type="checkbox"/> N <input type="checkbox"/> Y |
| Maternal-cardiac disease <sup>2</sup> | <input type="checkbox"/> N <input type="checkbox"/> Y | Maternal hypothyroidism      | <input type="checkbox"/> N <input type="checkbox"/> Y | Polihydramnios                         | <input type="checkbox"/> N <input type="checkbox"/> Y |
| Olidramnion                           | <input type="checkbox"/> N <input type="checkbox"/> Y | APH/major plac previa/accret | <input type="checkbox"/> N <input type="checkbox"/> Y | Severe Anaemia (Hb<7)                  | <input type="checkbox"/> N <input type="checkbox"/> Y |
| Other                                 | <input type="checkbox"/> N <input type="checkbox"/> Y |                              |                                                       |                                        |                                                       |

If Other maternal conditions, specify \_\_\_\_\_

If Other fetal conditions, specify \_\_\_\_\_

If Other, specify \_\_\_\_\_

**One tick only**

|                             |                                         |                                                 |                                                |                                       |
|-----------------------------|-----------------------------------------|-------------------------------------------------|------------------------------------------------|---------------------------------------|
| Steroids <sup>5</sup>       | <input type="checkbox"/> N              | <input type="checkbox"/> complete               | <input type="checkbox"/> incomplete            | <input type="checkbox"/> dose unclear |
| Previous CS                 | <input type="checkbox"/> N              | <input type="checkbox"/> Y                      | <input type="checkbox"/> Missing               | Number _____                          |
| If prev CS, trial of labour | <input type="checkbox"/> No previous CS | <input type="checkbox"/> N                      | <input type="checkbox"/> Y                     |                                       |
| Presentation                | <input type="checkbox"/> Cephalic       | <input type="checkbox"/> Breech                 | <input type="checkbox"/> Other                 | <input type="checkbox"/> Missing      |
| Labour onset                | <input type="checkbox"/> Spont          | <input type="checkbox"/> Induc (even if failed) | <input type="checkbox"/> PreLabCS <sup>6</sup> | <input type="checkbox"/> Missing      |
| Delivery mode               | <input type="checkbox"/> Vag spont      | <input type="checkbox"/> Vag forcep/ventuse     | <input type="checkbox"/> CS                    | <input type="checkbox"/> Missing      |
| If CS, type                 | <input type="checkbox"/> No CS          | <input type="checkbox"/> Emerg                  | <input type="checkbox"/> Elect                 | <input type="checkbox"/> Missing      |

**If IOL, main indication given (one tick only)**

|                                                      |                                                                                        |                                                  |                                                 |
|------------------------------------------------------|----------------------------------------------------------------------------------------|--------------------------------------------------|-------------------------------------------------|
| <input type="checkbox"/> 1 No IOL                    | <input type="checkbox"/> 2 Post-term                                                   | <input type="checkbox"/> 3 Prelab rupture memb   | <input type="checkbox"/> 4 Diabetes on diet     |
| <input type="checkbox"/> 5 Diabet on insulin/metform | <input type="checkbox"/> 6 Macrosomy at US <sup>7</sup>                                | <input type="checkbox"/> 7 IUGR/SGA <sup>4</sup> | <input type="checkbox"/> 8 Multiple pregnancies |
| <input type="checkbox"/> 9 Maternal Age > 40 y       | <input type="checkbox"/> 10 Hypert/Preecl/Eclam                                        | <input type="checkbox"/> 11 Cardiac disease      | <input type="checkbox"/> 12 Oligoidramn         |
| <input type="checkbox"/> 13 Other add _____          | <input type="checkbox"/> 14 Prolonged latent phase/ painful contractions not in labour | <input type="checkbox"/> 0 Missing               |                                                 |

**If IOL, mode of induction (one tick only)<sup>8</sup>**

|                                           |                                                |                                               |                                        |
|-------------------------------------------|------------------------------------------------|-----------------------------------------------|----------------------------------------|
| <input type="checkbox"/> 1 No IOL         | <input type="checkbox"/> 2 PGE                 | <input type="checkbox"/> 3 Oxytocin           | <input type="checkbox"/> 4 Foley       |
| <input type="checkbox"/> 5 ARM            | <input type="checkbox"/> 6 PGE+ oxytocin ± ARM | <input type="checkbox"/> 7 Foley+ARM/oxytocin | <input type="checkbox"/> 8 Foley + PGE |
| <input type="checkbox"/> 9 ARM + oxytocin | <input type="checkbox"/> 10 Other add: _____   | <input type="checkbox"/> 0 Missing            |                                        |

**If operative delivery, main indication (one tick only)**

|                                                 |                                                              |                                                      |
|-------------------------------------------------|--------------------------------------------------------------|------------------------------------------------------|
| <input type="checkbox"/> 1 No operative del     | <input type="checkbox"/> 2 CTG anom/suspected fetal distress | <input type="checkbox"/> 3 Failed induction          |
| <input type="checkbox"/> 4 Distocya 1st         | <input type="checkbox"/> 5 Distocya 2nd stage <sup>10</sup>  | <input type="checkbox"/> 6 Past CS                   |
| <input type="checkbox"/> 7 Breech/abnormal lie  | <input type="checkbox"/> 8 History of subfertility           | <input type="checkbox"/> 9 APH/major placenta previa |
| <input type="checkbox"/> 10 Cardiac disease     | <input type="checkbox"/> 11 Prelab diagn CPD/short mother    | <input type="checkbox"/> 12 Multiple pregnancies     |
| <input type="checkbox"/> 13 IUGR                | <input type="checkbox"/> 14 Pre term                         | <input type="checkbox"/> 15 Diab                     |
| <input type="checkbox"/> 16 Hypert/Preecl/Eclam | <input type="checkbox"/> 17 Maternal request                 | <input type="checkbox"/> 18 Other                    |
| <input type="checkbox"/> 0 Missing              |                                                              |                                                      |

If other fetal cause specify \_\_\_\_\_

If other maternal specify \_\_\_\_\_

If other cause \_\_\_\_\_

|                                |                                 |                                      |                                  |                                  |                              |                                                               |
|--------------------------------|---------------------------------|--------------------------------------|----------------------------------|----------------------------------|------------------------------|---------------------------------------------------------------|
| Episiotomy                     | <input type="checkbox"/> N      | <input type="checkbox"/> Y           | <input type="checkbox"/> Missing |                                  |                              |                                                               |
| Analges in labour <sup>9</sup> | <input type="checkbox"/> N      | <input type="checkbox"/> Petidine    | <input type="checkbox"/> Epid    | <input type="checkbox"/> Spin    | <input type="checkbox"/> Mix | <input type="checkbox"/> Other                                |
| If CS, anaesthesia             | <input type="checkbox"/> No CS  | <input type="checkbox"/> Spinal/epid | <input type="checkbox"/> General |                                  |                              |                                                               |
| 3 <sup>rd</sup> Stage manag    | <input type="checkbox"/> Active | <input type="checkbox"/> No active   | <input type="checkbox"/> Missing |                                  |                              |                                                               |
| Removal placenta               | <input type="checkbox"/> Spont  | <input type="checkbox"/> Manual      | <input type="checkbox"/> ERPC    | <input type="checkbox"/> Missing |                              |                                                               |
| Operator del                   | <input type="checkbox"/> Nurse  | <input type="checkbox"/> MW          | <input type="checkbox"/> HO      | <input type="checkbox"/> SHO     | <input type="checkbox"/> Reg | <input type="checkbox"/> Con <input type="checkbox"/> Missing |

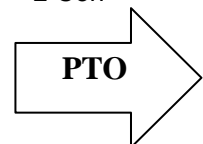

### Complications (one tick)

|                             |                                   |                                |                                      |                                                       |
|-----------------------------|-----------------------------------|--------------------------------|--------------------------------------|-------------------------------------------------------|
| <b>Perineal tears</b>       | <input type="checkbox"/> N/I-II d | <input type="checkbox"/> III d | <input type="checkbox"/> IV d        | <input type="checkbox"/> Missing                      |
| <b>PPH <sup>11</sup></b>    | <input type="checkbox"/> N        | <input type="checkbox"/> Minor | <input type="checkbox"/> Severe      | <input type="checkbox"/> Massive                      |
| <b>Blood transfusion</b>    | <input type="checkbox"/> N        | <input type="checkbox"/> Y     | <b>Units (#)</b>                     | _____                                                 |
| <b>Cord prolapse</b>        | <input type="checkbox"/> N        | <input type="checkbox"/> Y     | <b>Abruptio placentae</b>            | <input type="checkbox"/> N <input type="checkbox"/> Y |
| <b>Uterine rupture</b>      | <input type="checkbox"/> N        | <input type="checkbox"/> Y     | <b>Amn fluid embol</b>               | <input type="checkbox"/> N <input type="checkbox"/> Y |
| <b>Admission to ICU/HDO</b> | <input type="checkbox"/> N        | <input type="checkbox"/> Y     | <b>Major organ dys <sup>12</sup></b> | <input type="checkbox"/> N <input type="checkbox"/> Y |
| <b>OT after deliv</b>       | <input type="checkbox"/> N        | <input type="checkbox"/> Y     | <b>Hysterectomy</b>                  | <input type="checkbox"/> N <input type="checkbox"/> Y |
| <b>Sepsis/sev infect</b>    | <input type="checkbox"/> N        | <input type="checkbox"/> Y     | <b>DVT/PE</b>                        | <input type="checkbox"/> N <input type="checkbox"/> Y |
| <b>Other Complications</b>  | <input type="checkbox"/> N        | <input type="checkbox"/> Y     | <b>Other infections</b>              | <input type="checkbox"/> N <input type="checkbox"/> Y |

### Final outcome (one tick)

Discharged     Disc with disab due to preg complic <sup>13</sup>     Death     Referred     LAMA  
**Near Miss <sup>14</sup>**     N     Y

#### If NM or death, cause (select main; if more than one, write in Notes)

- |                                                    |                                                         |                                    |
|----------------------------------------------------|---------------------------------------------------------|------------------------------------|
| <input type="checkbox"/> 1 Pre-exist cardiac dis   | <input type="checkbox"/> 2 Other pre-existing medic con | <input type="checkbox"/> 3 Suicide |
| <input type="checkbox"/> 4 Hypertension            | <input type="checkbox"/> 5 Preeclampsia/Eclampsia       | <input type="checkbox"/> 6 PPH     |
| <input type="checkbox"/> 7 Amniotic fluid embolism | <input type="checkbox"/> 8 Sepsis/infection             | <input type="checkbox"/> 9 DVT/PE  |
| <input type="checkbox"/> 10 Complic anaesthesia    | <input type="checkbox"/> 11 Other                       | <input type="checkbox"/> 0 Missing |

If Others specify \_\_\_\_\_  
 Notes \_\_\_\_\_

Post delivery duration stay (days) <sup>15</sup>

If stay >24 h, reason  maternal  newborn  both  hospital regulations  Missing

#### -----NEWBORN (N1)-----

**Born**     Alive <sup>1</sup>     Dead <sup>2</sup>    **If stillbirth <sup>3</sup>**  noSB  Macerated  Fresh  Intrapartum  Missing

**Sex**     Female  Male  Missing    **BW (gr) <sup>4</sup>**        **Apgar1/5 /10**   /   /

**Ventilated in delivery room <sup>5</sup>**  N  Y  Missing    **Asphyxia <sup>6</sup>**  N  Y  Missing

**Postdelivery**     With mother  SCBU  NICU  Referred  Obitorio  Missing  
**Reason for referral**  medical complication  surgical complication  No beds  Other  Missing

If baby in NICU /SCBU, add here BHT code

#### COMPLICATIONS

**RDS <sup>7</sup>**     N  Y    **Jaundice with ET**     N  Y    **Sepsis**     N  Y

**Other Infect (incl NEC)**  N  Y    **Major birth trauma <sup>8</sup>**  N  Y    **Major malformation <sup>9</sup>**  N  Y

**Neurol (seizure, IVH, HIE)**  N  Y    **Phototherapy > 24 h**  N  Y    **Other**     N  Y

If other, add \_\_\_\_\_

**Final**     Discharged     Disc with disabilities     Death     Referred     LAMA

#### -----NEWBORN (N2 if twins)-----

**Born**     Alive <sup>1</sup>     Dead <sup>2</sup>    **If stillbirth <sup>3</sup>**  noSB  Macerated  Fresh  Intrapartum  Missing

**Sex**     Female  Male  Missing    **BW (gr) <sup>4</sup>**        **Apgar1/5 /10**   /   /

**Ventilated in delivery room <sup>5</sup>**  N  Y  Missing    **Asphyxia <sup>6</sup>**  N  Y  Missing

**Postdelivery**     With mother  SCBU  NICU  Referred  Obitorio  Missing  
**Reason for referral**  medical complication  surgical complication  No beds  Other  Missing

If baby in NICU /SCBU, add here BHT code

#### COMPLICATIONS

**RDS <sup>7</sup>**     N  Y    **Jaundice with ET**     N  Y    **Sepsis**     N  Y

**Other Infect (incl NEC)**  N  Y    **Major birth trauma <sup>8</sup>**  N  Y    **Major malformation <sup>9</sup>**  N  Y

**Neurol (seizure, IVH, HIE)**  N  Y    **Phototherapy > 24 h**  N  Y    **Other**     N  Y

If other, add \_\_\_\_\_

**Final**     Discharged     Disc with disabilities     Death     Referred     LAMA

## \*DEFINITIONS (WOMAN)

- <sup>1</sup> **Gravida /Para/ Born alive:** fill this excluding current pregnancy/delivery (example: 3 pregnancies, 2 children, 1 stillbirth will be gravida 3, para 2, born alive 1)
- <sup>2</sup> **Risk factors at time of delivery:** consider here the risk factors present at time of delivery and that can affect the delivery outcome. Examples:
- If the mother had severe anaemia but this was corrected before delivery, do not tick the severe anaemia box).
  - If the mother had hypertension, pre-eclampsia, eclampsia, or hypothyroidism during current pregnancy, still tick the box even if the situation is under control
  - If relevant cardiac problems present or even in the past, still tick the box.
- <sup>3</sup> **Hypertension:** this is defined with a BP > 140/90
- <sup>4</sup> **IUGR/SGA:** defined as weight < 10 centile of estimated weight-for-GA or < 10 centile for abdominal circumference (Bangladesh growth chart). IUGR/SGA is based on US estimate (if there was an indication for US, such as clinical signs suggesting IUGR, but US was not performed or uncertain, collect this information under "other or uncertain".
- <sup>5</sup> **Steroids:** Complete dose is Dexametason 8 mg /12 hrs for 3 doses –can you double if this is your national standard ? (last GL 6mg/ 12 h 48 h)
- <sup>6</sup> **Induction:** as labour onset should be selected even in the case of **failed IOL** and subsequent CS, not "prelabour caesarean section" (note that this is accordingly to Robson classification)
- <sup>7</sup> **Macrosomy at US:** defined as weight > 3500 grams or 90 Centile weight-for-GA
- <sup>8</sup> **If IOL, mode of induction:** record here only procedures for IOL, i.e. until 4 cm dilatation
- <sup>9</sup> **Analg:** record only drugs actually given (not just prescribed). Record paracetamol under "other"
- <sup>10</sup> **Distocya 2nd stage:** CS at full dilatation
- <sup>11</sup> **PPH Minor** (not severe not massive) Severe PPH ( $\geq 1000$  ml or any bleeding with hypotension or tachycardia or blood transfusion) Massive (lost of  $\geq 40\%$  of blood volume, blood volume= body weight(kg)/12)
- <sup>12</sup> **Major organ dysfunction:** as for Near miss definition -do not consider diabetes as major organ dysfunction (see following ANNEX 1)
- <sup>13</sup> **Disabilities from pregnancy complications:** include here stroke, anaemia, post partum depression or other psychiatric disorders and other disabilities (not include preexisting problems such as GDM, hypertension, or hysterectomy)
- <sup>14</sup> **Near Miss=** A maternal near-miss case is defined as "a woman who nearly died but survived a complication that occurred during pregnancy, childbirth or within 42 days of termination of pregnancy" (*WHO 2011*). This implies either severe disease (severe PPH, severe pre-eclampsia, Eclampsia, sepsis, uterine rupture, severe complications of abortion), or critical interventions (admission UTI, intervention radiology, lapartotomy, blood transfusion) or organ dysfunction (see ANNEX 1)
- <sup>15</sup> **Post delivery duration stay:** count this in days. If admitted on 2 April and out day 3 April count this as 1 day if it is less than 24 h. If more than 24h, count this as 2 days

## DEFINITIONS (NEWBORN)

- <sup>1</sup> **Born alive=** fetus/baby of any GA and any birth weight showing any sign of vital activity (breath, cardiac, movements)
- <sup>2</sup> **Born dead=** when not born alive; it includes stillbirth
- <sup>3</sup> **Stillbirth =** macerated are fresh are based on clinical evaluation; intrapartum is a fetus where heart rate was perceived before delivery (and than lost after delivery)
- <sup>4</sup> **Birth weight=** avoid approximation (use weight in grams)
- <sup>5</sup> **Ventilated in delivery room=** not just stimulated, but ventilated (with bag or CPAP) for more than *10 seconds*
- <sup>6</sup> **Asphyxia=** no spontaneous start of breathing, ventilation for at least *30 sec* and/or thoracic compressions as in international guidelines or any drug
- <sup>7</sup> **RDS (Respiratory Distress Syndrome)=** tick this box for a baby with respiratory distress lasting more than 24 hours
- <sup>8</sup> **Major birth trauma=** include here brachial plexus injury/arm palsy, fractures at any site, sub-aponeurotic (subgaleal) hemorrhage. Do NOT include here cephaloematoma and caput succedaneum
- <sup>9</sup> **Major Malformation=** do not include here minor malformation such as skin tags and pits, syndactyly, polydactyly, additional finger, PDA even if persistent.
- <sup>10</sup> **Day of death=** for still birth use day zero

## <sup>12</sup> ANNEX 1 DEFINITIONS ORGAN DYSFUNCTION (SOURCE: WHO MANUAL)

### Organ dysfunction / life-threatening conditions

- C0 Cardiovascular dysfunction**  
[shock, use of continuous vasoactive drugs, cardiac arrest, cardio-pulmonary resuscitation, severe hypoperfusion (lactate  $>5$  mmol/L or  $>45$ mg/dL) or severe acidosis (pH $<7.1$ )]
- C1 Respiratory dysfunction**  
[acute cyanosis, gasping, severe tachypnea (respiratory rate $>40$  bpm), severe bradypnea (respiratory rate $<6$  bpm), severe hypoxemia (PAO<sub>2</sub>/F<sub>i</sub>O<sub>2</sub> $<200$  O<sub>2</sub> saturation  $<90\%$  for  $\geq 60$ min) or intubation and ventilation not related to anaesthesia]
- C2 Renal dysfunction**  
[oliguria non responsive to fluids or diuretics, dialysis for acute renal failure or severe acute azotemia (creatinine  $\geq 300$ umol/ml or  $\geq 3.5$ mg/dL)]
- C3 Coagulation/hematologic dysfunction**  
[failure to form clots, massive transfusion of blood or red cells ( $\geq 5$  units) or severe acute thrombocytopenia ( $<50,000$  platelets/ml)]
- C4 Hepatic dysfunction**  
[jaundice in the presence of pre-eclampsia, severe acute hyperbilirubinemia (bilirubin $>100$ umol/L or  $>6.0$ mg/dL)]
- C5 Neurologic dysfunction**  
[prolonged unconsciousness / coma (lasting  $>12$  hours), stroke, status epilepticus / uncontrollable fits, total paralysis]
- C6 Uterine dysfunction / Hysterectomy**  
[haemorrhage or infection leading to hysterectomy]

## Appendix 2. Missing variables

|                                               | Total | Missing | % Missing |
|-----------------------------------------------|-------|---------|-----------|
| <b>Maternal variables</b>                     |       |         |           |
| Age                                           | 7504  | 34      | 0.4       |
| Work                                          | 7504  | 38      | 0.5       |
| Education                                     | 7504  | 37      | 0.4       |
| Para (number of children)                     | 7504  | 34      | 0.4       |
| Marital status                                | 7504  | 38      | 0.5       |
| Gravidas (pregnancies, including the ongoing) | 7504  | 34      | 0.4       |
| Born alive                                    | 7504  | 34      | 0.4       |
| Gestational age at delivery                   | 7504  | 47      | 0.6       |
| Gestational age estimated with ultrasounds    | 7504  | 53      | 0.7       |
| BMI                                           | 7504  | 53      | 0.7       |
| Discharge                                     | 7504  | 35      | 0.4       |
| Delivery                                      | 7504  | 32      | 0.4       |
| Multiple pregnancies                          | 7504  | 34      | 0.4       |
| Pregestetional hypertension                   | 7504  | 33      | 0.4       |
| Gestetional hypertension (no proteinuria)     | 7504  | 35      | 0.4       |
| Pre-eclampsia not severe                      | 7504  | 35      | 0.4       |
| Pre-eclampsia severe                          | 7504  | 35      | 0.4       |
| Eclampsia                                     | 7504  | 34      | 0.4       |
| Chorionamnionitis                             | 7504  | 36      | 0.4       |
| Major fetal malformation                      | 7504  | 36      | 0.4       |
| IUGR/SGA                                      | 7504  | 36      | 0.4       |
| Pregestetional diabetes                       | 7504  | 35      | 0.4       |
| Gestetional diabetes mellitus in diet         | 7504  | 35      | 0.4       |
| Gestetional diabetes mellitus in drug therapy | 7504  | 36      | 0.4       |
| Maternal cardiac disease                      | 7504  | 34      | 0.4       |
| Maternal hypothyroidism                       | 7504  | 37      | 0.4       |
| Polihydramnios                                | 7504  | 36      | 0.4       |
| Oligohydramnios                               | 7504  | 38      | 0.4       |
| APH/major placentia previa                    | 7504  | 37      | 0.4       |
| Severe anaemia                                | 7504  | 38      | 0.5       |
| Other (risk factors)                          | 7504  | 63      | 0.8       |
| Steroids                                      | 7504  | 37      | 0.4       |

|                                   |      |    |     |
|-----------------------------------|------|----|-----|
| Previous CS                       | 7504 | 38 | 0.5 |
| If previous CS, trial of labour   | 7504 | 39 | 0.4 |
| Presentation                      | 7504 | 37 | 0.4 |
| Labour onset                      | 7504 | 36 | 0.4 |
| Delivery mode                     | 7504 | 37 | 0.4 |
| If CS, type                       | 7504 | 37 | 0.4 |
| Indication of labour              | 7504 | 36 | 0.4 |
| Mode of induction                 | 7504 | 42 | 0.5 |
| If operative delivery, indication | 7504 | 38 | 0.5 |
| Episiotomy                        | 7504 | 43 | 0.5 |
| Analgesia in labour               | 7504 | 43 | 0.5 |
| 3 <sup>rd</sup> stage management  | 7504 | 39 | 0.5 |
| Removal of placenta               | 7504 | 39 | 0.5 |
| Operator delivery                 | 7504 | 41 | 0.5 |
| Perineal tears                    | 7504 | 36 | 0.4 |
| PPH                               | 7504 | 38 | 0.5 |
| Blood transfusion                 | 7504 | 36 | 0.4 |
| Cord collapse                     | 7504 | 42 | 0.5 |
| Uterine rupture                   | 7504 | 42 | 0.5 |
| Admission to ICU                  | 7504 | 22 | 0.2 |
| OT after delivery                 | 7504 | 43 | 0.5 |
| Sepsis/several infections         | 7504 | 44 | 0.5 |
| Other complications               | 7504 | 45 | 0.6 |
| Abruption placentae               | 7504 | 42 | 0.5 |
| Amniotic fluid embolism           | 7504 | 42 | 0.5 |
| Major organ dysfunction           | 7504 | 37 | 0.4 |
| Hysterectomy                      | 7504 | 36 | 0.4 |
| DVT                               | 7504 | 46 | 0.6 |
| Final outcome                     | 7504 | 42 | 0.5 |
| Near miss                         | 7504 | 20 | 0.2 |
| <b>Newborn variables ¶</b>        |      |    |     |
| Born                              | 7504 | 43 | 0.5 |
| If stillbirth, fresh or macerated | 7504 | 75 | 1.0 |

|                                                |      |     |     |
|------------------------------------------------|------|-----|-----|
| Sex                                            | 7504 | 51  | 0.6 |
| Birth weight                                   | 7504 | 68  | 0.9 |
| Apgar at 1'                                    | 7504 | 168 | 2.2 |
| Apgar at 5'                                    | 7504 | 168 | 2.2 |
| Apgar at 10'                                   | 7504 | 166 | 2.2 |
| Ventilated in delivery room                    | 7504 | 119 | 1.5 |
| Asphyxia                                       | 7504 | 124 | 1.6 |
| Post-delivery                                  | 7504 | 44  | 0.5 |
| Respiratory distress syndrome                  | 7504 | 114 | 1.5 |
| Other infections                               | 7504 | 110 | 1.4 |
| Neurological complications (seizure, IVH, HIE) | 7504 | 114 | 1.5 |
| Jaundice with ET                               | 7504 | 112 | 1.4 |
| Major birth trauma                             | 7504 | 120 | 1.6 |
| Phototherapy for over 24 hours                 | 7504 | 121 | 1.6 |
| Sepsis                                         | 7504 | 113 | 1.5 |
| Major malformation                             | 7504 | 120 | 1.6 |
| Other complications                            | 7504 | 172 | 2.3 |
| Final                                          | 7504 | 108 | 1.4 |

Abbreviations: APH= ante-partum haemorrhage; BMI= body Mass index; CS= caesarian section; DVT= deep vein thrombosis; ET= exchange transfusion; HIE= Hypoxic Ischemic Encephalopathy; ICU= Intensive care unit; IUGR=Intra-uterine growth restriction; IVH= intra-ventricular haemorrhage; OT=operating theatre; PPH= post-partum haemorrhage; SGA= small for gestational age.

<sup>†</sup> For multiple pregnancies, only data on the first newborn provided
